# Supplementary material
Source: ML conference proceedings conference paper supplement (https://proceedings.neurips.cc/paper_files/paper/2022/hash/66562bf632d45e83232437afaf2aa92b-Abstract.html)
Supplement: Supplementary file 1 [file 66562bf632d45e83232437afaf2aa92b-Supplemental-Conference.zip]

Archive with 9 entries (9 files):
- __pycache__/algorithms.cpython-39.pyc
- __pycache__/examples.cpython-39.pyc
- __pycache__/experiments.cpython-39.pyc
- algorithms.py
- examples.py
- experiments.py
- full paper.pdf
- nlsym.csv
- README.txt
