# Supplementary material
Source: ML conference proceedings conference paper supplement (https://proceedings.neurips.cc/paper_files/paper/2022/hash/66562bf632d45e83232437afaf2aa92b-Abstract.html)
Supplement: Supplementary file 1 [file 66562bf632d45e83232437afaf2aa92b-Supplemental-Conference.zip › nlsym.csv]

	id	nearc2	nearc4	educ	age	fatheduc	motheduc	weight	momdad14	sinmom14	step14	reg661	reg662	reg663	reg664	reg665	reg666	reg667	reg668	reg669	south66	black	smsa	south	smsa66	wage	enroll	KWW	IQ	married	libcrd14	exper	lwage	expersq	region
1	2	0	0	7	29	NA	NA	158413	1	0	0	1	0	0	0	0	0	0	0	0	0	1	1	0	1	548	0	15	NA	1	0	16	6.30627536773682	256	661
2	3	0	0	12	27	8	8	380166	1	0	0	1	0	0	0	0	0	0	0	0	0	0	1	0	1	481	0	35	93	1	1	9	6.17586708068848	81	661
3	4	0	0	12	34	14	12	367470	1	0	0	1	0	0	0	0	0	0	0	0	0	0	1	0	1	721	0	42	103	1	1	16	6.58063936233521	256	661
4	5	1	1	11	27	11	12	380166	1	0	0	0	1	0	0	0	0	0	0	0	0	0	1	0	1	250	0	25	88	1	1	10	5.52146100997925	100	662
5	6	1	1	12	34	8	7	367470	1	0	0	0	1	0	0	0	0	0	0	0	0	0	1	0	1	729	0	34	108	1	0	16	6.59167385101318	256	662
6	7	1	1	12	26	9	12	380166	1	0	0	0	1	0	0	0	0	0	0	0	0	0	1	0	1	500	0	38	85	1	1	8	6.21460819244385	64	662
7	8	1	1	18	33	14	14	367470	1	0	0	0	1	0	0	0	0	0	0	0	0	0	1	0	1	565	0	41	119	1	1	9	6.33682584762573	81	662
8	9	1	1	14	29	14	14	496635	1	0	0	0	1	0	0	0	0	0	0	0	0	0	1	0	1	608	0	46	108	1	1	9	6.41017484664917	81	662
9	10	1	1	12	28	12	12	367772	1	0	0	0	1	0	0	0	0	0	0	0	0	0	1	0	1	425	0	32	96	4	0	10	6.05208921432495	100	662
10	11	1	1	12	29	12	12	480445	1	0	0	0	1	0	0	0	0	0	0	0	0	0	1	0	1	515	0	34	97	1	1	11	6.2441668510437	121	662
11	12	1	1	9	28	11	12	380166	1	0	0	0	0	0	0	0	0	0	0	1	0	0	1	0	1	225	0	29	84	1	0	13	5.41610050201416	169	669
12	13	1	1	12	26	11	6	380166	1	0	0	0	1	0	0	0	0	0	0	0	0	0	1	0	1	400	0	34	89	1	1	8	5.99146461486816	64	662
13	14	1	1	11	24	11	6	369567	1	0	0	0	1	0	0	0	0	0	0	0	0	0	1	0	1	417	0	22	93	1	1	7	6.03308629989624	49	662
14	15	1	1	11	30	11	6	496635	1	0	0	0	1	0	0	0	0	0	0	0	0	0	1	0	1	217	0	27	74	1	0	13	5.37989711761475	169	662
15	16	1	1	16	31	NA	8	648053	0	1	0	0	1	0	0	0	0	0	0	0	0	1	1	0	1	894	0	43	116	1	1	9	6.79570579528809	81	662
16	17	1	1	14	24	15	12	357519	1	0	0	0	1	0	0	0	0	0	0	0	0	0	1	0	1	300	0	36	NA	6	1	4	5.70378255844116	16	662
17	19	1	1	12	34	12	8	367470	1	0	0	0	1	0	0	0	0	0	0	0	0	0	1	0	1	346	0	40	93	1	1	16	5.84643888473511	256	662
18	20	1	1	14	29	NA	12	496635	0	1	0	0	1	0	0	0	0	0	0	0	0	0	1	0	1	658	0	35	100	1	1	9	6.48920488357544	81	662
19	22	1	1	10	26	8	8	367772	1	0	0	0	1	0	0	0	0	0	0	0	0	0	1	0	1	575	0	24	91	6	0	10	6.3543701171875	100	662
20	25	1	1	12	32	8	8	355491	1	0	0	0	1	0	0	0	0	0	0	0	0	0	1	0	1	649	0	35	88	1	0	14	6.47543287277222	196	662
21	26	1	1	18	32	12	13	367470	1	0	0	1	0	0	0	0	0	0	0	0	0	0	1	1	1	944	0	43	NA	1	1	8	6.85012626647949	64	661
22	29	1	1	18	34	NA	8	408301	1	0	0	1	0	0	0	0	0	0	0	0	0	0	1	0	1	614	0	50	114	1	1	10	6.41999483108521	100	661
23	30	1	1	15	32	5	14	367470	1	0	0	1	0	0	0	0	0	0	0	0	0	0	0	0	1	726	0	37	111	1	1	11	6.58755016326904	121	661
24	31	0	1	12	28	14	12	380166	1	0	0	1	0	0	0	0	0	0	0	0	0	0	1	0	1	604	0	44	NA	1	1	10	6.40357398986816	100	661
25	32	0	1	12	32	11	12	367470	1	0	0	1	0	0	0	0	0	0	0	0	0	0	1	0	1	693	0	44	95	1	1	14	6.54102993011475	196	661
26	35	0	1	18	34	14	13	367470	1	0	0	1	0	0	0	0	0	0	0	0	0	0	0	0	1	1400	0	44	132	1	1	10	7.24422740936279	100	661
27	36	0	1	12	26	7	12	367772	1	0	0	1	0	0	0	0	0	0	0	0	0	0	1	0	1	300	0	27	NA	6	1	8	5.70378255844116	64	661
28	37	0	1	18	32	16	16	355491	1	0	0	0	1	0	0	0	0	0	0	0	0	0	1	0	1	1800	0	38	109	5	1	8	7.49554204940796	64	662
29	38	0	1	12	25	11	12	357519	1	0	0	1	0	0	0	0	0	0	0	0	0	0	1	0	1	413	0	43	108	1	1	7	6.02344751358032	49	661
30	39	0	1	14	29	NA	16	496635	0	1	0	1	0	0	0	0	0	0	0	0	0	0	0	0	0	632	0	45	102	1	1	9	6.44888925552368	81	661
31	47	1	1	12	25	12	12	90339	1	0	0	0	1	0	0	0	0	0	0	0	0	0	1	0	1	208	0	30	106	1	1	7	5.33753824234009	49	662
32	48	1	1	12	25	NA	11	102031	0	1	0	0	1	0	0	0	0	0	0	0	0	1	1	0	1	457	0	40	104	6	1	7	6.12468338012695	49	662
33	53	1	1	16	24	10	10	369567	1	0	0	0	1	0	0	0	0	0	0	0	0	0	1	0	1	824	0	24	119	1	1	2	6.71417045593262	4	662
34	54	1	1	18	34	NA	12	408301	0	1	0	0	1	0	0	0	0	0	0	0	0	0	1	0	1	577	0	47	122	1	1	10	6.35784244537354	100	662
35	55	1	1	11	28	6	10	380166	0	0	1	0	1	0	0	0	0	0	0	0	0	0	1	0	1	255	0	32	90	1	1	11	5.54126358032227	121	662
36	62	1	1	16	30	12	12	496635	1	0	0	0	1	0	0	0	0	0	0	0	0	0	1	0	1	962	0	47	118	1	1	8	6.86901426315308	64	662
37	63	1	1	10	31	8	6	496635	1	0	0	0	1	0	0	0	0	0	0	0	0	0	1	0	1	944	0	37	105	1	0	15	6.85012626647949	225	662
38	64	1	1	18	34	8	11	367470	1	0	0	0	1	0	0	0	0	0	0	0	0	0	1	0	1	1146	1	43	115	1	1	10	7.04403305053711	100	662
39	77	1	1	6	27	2	6	104596	1	0	0	0	1	0	0	0	0	0	0	0	0	0	1	0	1	324	0	16	NA	1	1	15	5.78074359893799	225	662
40	79	1	1	11	24	6	12	102031	1	0	0	0	1	0	0	0	0	0	0	0	0	1	1	0	1	235	0	27	65	5	1	7	5.45958566665649	49	662
41	80	1	1	12	34	11	10	367470	1	0	0	0	1	0	0	0	0	0	0	0	0	0	1	0	1	1000	0	45	120	1	0	16	6.90775537490845	256	662
42	81	1	1	9	26	NA	12	422407	0	1	0	0	1	0	0	0	0	0	0	0	0	0	1	0	1	481	0	31	86	4	1	11	6.17586708068848	121	662
43	82	1	1	15	32	10	12	89826	1	0	0	0	1	0	0	0	0	0	0	0	0	0	1	0	1	624	0	39	109	1	1	11	6.43615055084229	121	662
44	83	1	1	11	34	8	10	89826	1	0	0	0	1	0	0	0	0	0	0	0	0	0	1	0	1	650	0	36	72	1	0	17	6.47697257995605	289	662
45	87	1	1	12	24	NA	10	102031	0	1	0	0	1	0	0	0	0	0	0	0	0	1	1	0	1	344	0	31	NA	6	0	6	5.84064149856567	36	662
46	90	1	1	16	24	12	10	369567	1	0	0	0	1	0	0	0	0	0	0	0	0	0	1	1	1	380	0	NA	NA	6	0	2	5.94017124176025	4	662
47	91	1	1	12	24	12	11	369567	1	0	0	0	1	0	0	0	0	0	0	0	0	0	1	0	1	353	0	25	101	1	1	6	5.86646795272827	36	662
48	92	1	1	13	25	NA	12	369567	0	1	0	0	1	0	0	0	0	0	0	0	0	0	1	0	1	659	0	29	105	6	1	6	6.49072360992432	36	662
49	93	1	1	17	28	10	10	380166	1	0	0	0	1	0	0	0	0	0	0	0	0	0	1	0	1	621	1	48	136	1	1	5	6.43133115768433	25	662
50	97	1	1	12	25	10	11	369567	1	0	0	0	1	0	0	0	0	0	0	0	0	0	1	0	1	440	0	40	101	1	1	7	6.0867748260498	49	662
51	98	1	1	12	26	12	10	104596	1	0	0	0	1	0	0	0	0	0	0	0	0	1	1	0	1	738	0	34	96	6	1	8	6.60394382476807	64	662
52	102	1	1	11	31	5	5	158413	1	0	0	0	1	0	0	0	0	0	0	0	0	1	0	1	1	280	0	36	NA	1	0	14	5.63478946685791	196	662
53	107	1	1	10	24	5	NA	369567	0	0	0	0	1	0	0	0	0	0	0	0	0	0	1	0	1	434	0	34	NA	1	1	8	6.07304430007935	64	662
54	108	1	1	12	27	NA	8	380166	0	1	0	0	1	0	0	0	0	0	0	0	0	0	1	0	1	705	0	34	101	1	1	9	6.55819797515869	81	662
55	110	1	1	12	27	10	12	380166	1	0	0	0	1	0	0	0	0	0	0	0	0	0	1	0	1	425	0	32	91	1	1	9	6.05208921432495	81	662
56	111	1	1	12	24	NA	4	369567	0	1	0	0	1	0	0	0	0	0	0	0	0	0	1	0	1	571	0	35	NA	1	1	6	6.34738922119141	36	662
57	112	1	1	16	30	12	12	496635	1	0	0	0	1	0	0	0	0	0	0	0	0	0	1	0	1	538	0	52	115	6	1	8	6.28785848617554	64	662
58	115	1	1	16	32	12	12	408301	1	0	0	0	1	0	0	0	0	0	0	0	0	0	1	0	1	740	0	49	113	1	1	10	6.60665035247803	100	662
59	116	1	1	13	32	10	12	367470	1	0	0	0	1	0	0	0	0	0	0	0	0	0	1	0	1	673	1	43	123	1	1	13	6.51174545288086	169	662
60	119	1	1	12	34	10	10	89826	1	0	0	0	1	0	0	0	0	0	0	0	0	0	1	0	1	769	0	36	95	1	1	16	6.64509105682373	256	662
61	121	1	1	12	24	10	10	90339	0	0	0	0	1	0	0	0	0	0	0	0	0	0	1	0	1	592	0	26	102	1	1	6	6.38350677490234	36	662
62	125	1	1	9	24	12	11	102031	1	0	0	0	1	0	0	0	0	0	0	0	0	1	1	0	1	213	0	15	NA	6	1	9	5.36129236221313	81	662
63	127	1	1	16	34	12	12	367470	1	0	0	0	1	0	0	0	0	0	0	0	0	0	1	0	1	1563	0	50	145	1	1	12	7.35436248779297	144	662
64	129	1	1	16	28	11	11	380166	1	0	0	0	1	0	0	0	0	0	0	0	0	0	1	0	1	774	0	35	114	1	1	6	6.65157175064087	36	662
65	131	1	1	12	26	8	9	380166	1	0	0	0	1	0	0	0	0	0	0	0	0	0	1	1	1	600	0	35	113	1	0	8	6.39692974090576	64	662
66	133	1	1	18	24	16	16	369567	1	0	0	0	1	0	0	0	0	0	0	0	0	0	1	0	1	693	0	24	NA	6	1	0	6.54102993011475	0	662
67	135	1	1	13	31	8	12	496635	1	0	0	0	1	0	0	0	0	0	0	0	0	0	1	0	1	570	0	40	93	5	1	12	6.34563636779785	144	662
68	136	1	1	14	28	12	12	380166	1	0	0	0	1	0	0	0	0	0	0	0	0	0	1	0	1	433	0	38	NA	5	1	8	6.07073783874512	64	662
69	137	1	1	15	28	12	12	380166	1	0	0	0	1	0	0	0	0	0	0	0	0	0	1	0	1	538	0	37	119	2	0	7	6.28785848617554	49	662
70	138	1	1	12	25	12	9	369567	0	0	0	0	1	0	0	0	0	0	0	0	0	0	1	0	1	627	0	35	108	6	1	7	6.44094657897949	49	662
71	139	1	1	8	31	12	11	496635	1	0	0	0	1	0	0	0	0	0	0	0	0	0	1	0	1	481	0	35	NA	1	1	17	6.17586708068848	289	662
72	141	1	1	12	26	6	11	380166	1	0	0	0	1	0	0	0	0	0	0	0	0	0	1	0	1	545	0	26	72	1	1	8	6.30078601837158	64	662
73	142	1	1	12	25	12	9	369567	1	0	0	0	1	0	0	0	0	0	0	0	0	0	1	0	1	576	0	34	86	1	1	7	6.35610771179199	49	662
74	144	1	1	16	25	14	12	90339	1	0	0	0	1	0	0	0	0	0	0	0	0	0	1	0	1	700	0	42	123	1	1	3	6.55108022689819	9	662
75	147	1	1	16	28	12	12	367772	1	0	0	0	1	0	0	0	0	0	0	0	0	0	1	0	1	788	0	38	103	1	1	6	6.66949796676636	36	662
76	148	1	1	17	27	12	12	367772	1	0	0	0	1	0	0	0	0	0	0	0	0	0	1	0	1	1012	0	42	101	1	1	4	6.91968393325806	16	662
77	149	1	1	12	24	12	10	357519	1	0	0	0	1	0	0	0	0	0	0	0	0	0	1	0	1	758	0	30	NA	1	1	6	6.63068342208862	36	662
78	150	1	1	14	29	12	16	480445	1	0	0	0	1	0	0	0	0	0	0	0	0	0	1	0	1	601	1	41	105	6	1	9	6.39859485626221	81	662
79	151	1	1	12	24	NA	12	357519	0	1	0	0	1	0	0	0	0	0	0	0	0	0	1	0	1	283	0	34	NA	6	1	6	5.64544677734375	36	662
80	154	1	1	12	24	12	12	397244	0	0	1	0	1	0	0	0	0	0	0	0	0	0	1	0	1	250	0	29	NA	6	1	6	5.52146100997925	36	662
81	156	1	1	12	26	10	12	367772	1	0	0	0	1	0	0	0	0	0	0	0	0	0	1	0	1	500	0	33	95	1	1	8	6.21460819244385	64	662
82	157	1	1	11	31	8	6	480445	1	0	0	0	1	0	0	0	0	0	0	0	0	0	1	0	1	550	0	41	98	1	1	14	6.30991840362549	196	662
83	158	1	1	12	25	8	6	357519	1	0	0	0	1	0	0	0	0	0	0	0	0	0	1	0	1	1143	0	27	NA	1	1	7	7.04141187667847	49	662
84	159	1	1	18	31	8	8	480445	1	0	0	0	1	0	0	0	0	0	0	0	0	0	1	1	1	810	0	39	115	4	0	7	6.69703435897827	49	662
85	164	1	1	12	28	NA	9	104596	0	1	0	0	1	0	0	0	0	0	0	0	0	1	1	0	1	313	0	20	60	6	1	10	5.74620342254639	100	662
86	166	1	1	18	25	NA	4	369567	0	1	0	0	1	0	0	0	0	0	0	0	0	0	1	0	1	731	0	36	135	1	1	1	6.59441328048706	1	662
87	168	1	1	16	25	9	10	369567	1	0	0	0	1	0	0	0	0	0	0	0	0	0	1	0	1	625	1	35	132	1	1	3	6.43775177001953	9	662
88	169	1	1	14	24	16	12	369567	1	0	0	0	1	0	0	0	0	0	0	0	0	0	1	0	1	588	1	33	106	1	1	4	6.37672710418701	16	662
89	170	1	1	14	26	12	12	380166	1	0	0	0	1	0	0	0	0	0	0	0	0	0	1	0	1	375	1	28	113	1	1	6	5.92692613601685	36	662
90	173	1	1	16	29	14	11	496635	1	0	0	0	1	0	0	0	0	0	0	0	0	0	1	1	0	817	0	43	102	6	1	7	6.70563888549805	49	662
91	175	1	1	14	30	15	12	496635	1	0	0	0	1	0	0	0	0	0	0	0	0	0	1	0	1	865	0	32	91	1	1	10	6.76272964477539	100	662
92	176	1	1	15	28	12	12	380166	1	0	0	0	1	0	0	0	0	0	0	0	0	0	1	1	0	350	0	30	104	1	1	7	5.85793304443359	49	662
93	177	1	1	13	24	12	12	369567	1	0	0	0	1	0	0	0	0	0	0	0	0	0	1	1	1	202	0	22	NA	1	1	5	5.30826759338379	25	662
94	178	1	1	13	32	16	16	367470	0	0	1	0	1	0	0	0	0	0	0	0	0	0	1	1	1	505	0	43	97	1	1	13	6.22455835342407	169	662
95	179	1	1	17	30	12	13	480445	1	0	0	0	1	0	0	0	0	0	0	0	0	0	1	0	1	816	0	41	125	1	1	7	6.70441436767578	49	662
96	181	1	1	18	26	14	12	380166	1	0	0	0	1	0	0	0	0	0	0	0	0	0	1	0	1	625	0	41	123	6	1	2	6.43775177001953	4	662
97	182	1	1	18	32	16	16	367470	1	0	0	0	1	0	0	0	0	0	0	0	0	0	1	0	0	769	0	35	128	6	1	8	6.64509105682373	64	662
98	183	1	1	17	27	16	17	380166	1	0	0	0	1	0	0	0	0	0	0	0	0	0	1	0	1	500	1	38	133	6	1	4	6.21460819244385	16	662
99	188	1	1	17	27	12	8	380166	1	0	0	0	1	0	0	0	0	0	0	0	0	0	1	0	0	619	1	32	114	1	1	4	6.42810535430908	16	662
100	192	1	1	12	30	NA	8	480445	0	1	0	0	1	0	0	0	0	0	0	0	0	0	1	0	1	650	0	40	103	1	1	12	6.47697257995605	144	662
101	194	0	1	18	28	10	12	380166	1	0	0	0	1	0	0	0	0	0	0	0	0	0	1	0	1	769	0	36	130	1	1	4	6.64509105682373	16	662
102	195	0	1	12	26	10	12	380166	1	0	0	0	1	0	0	0	0	0	0	0	0	0	1	0	1	512	0	33	97	1	1	8	6.2383246421814	64	662
103	196	0	1	18	31	12	13	496635	1	0	0	0	1	0	0	0	0	0	0	0	0	0	1	0	1	625	0	46	132	1	1	7	6.43775177001953	49	662
104	197	0	1	14	31	12	12	496635	1	0	0	0	1	0	0	0	0	0	0	0	0	0	1	0	1	1111	0	41	98	1	1	11	7.01301574707031	121	662
105	198	0	1	13	28	12	12	380166	1	0	0	0	1	0	0	0	0	0	0	0	0	0	1	0	1	721	0	41	108	1	1	9	6.58063936233521	81	662
106	199	0	1	14	32	13	12	367470	1	0	0	0	1	0	0	0	0	0	0	0	0	0	1	0	1	1154	0	44	107	1	1	12	7.05098962783813	144	662
107	201	0	1	18	34	18	18	367470	1	0	0	0	1	0	0	0	0	0	0	0	0	0	0	0	1	827	0	40	129	6	1	10	6.71780490875244	100	662
108	204	0	1	16	34	14	12	367470	1	0	0	0	1	0	0	0	0	0	0	0	0	0	1	0	1	923	0	56	NA	1	1	12	6.82762908935547	144	662
109	205	0	1	17	28	14	17	380166	1	0	0	0	1	0	0	0	0	0	0	0	0	0	1	0	0	1076	0	42	132	1	1	5	6.98100566864014	25	662
110	209	0	1	12	33	NA	8	367470	1	0	0	0	1	0	0	0	0	0	0	0	0	0	1	0	1	625	0	37	101	1	1	15	6.43775177001953	225	662
111	210	0	1	13	27	NA	8	380166	0	1	0	0	1	0	0	0	0	0	0	0	0	0	1	0	1	460	0	24	92	1	1	8	6.13122653961182	64	662
112	213	0	1	14	24	8	12	102031	1	0	0	0	1	0	0	0	0	0	0	0	0	1	1	0	1	900	0	39	108	6	1	4	6.80239486694336	16	662
113	214	0	1	18	29	8	9	496635	1	0	0	0	1	0	0	0	0	0	0	0	0	0	1	0	0	682	0	NA	132	1	1	5	6.52502965927124	25	662
114	217	0	1	12	24	10	12	369567	1	0	0	0	1	0	0	0	0	0	0	0	0	0	1	0	1	411	0	20	NA	1	1	6	6.01859331130981	36	662
115	218	0	1	13	27	12	15	380166	1	0	0	0	1	0	0	0	0	0	0	0	0	0	1	0	1	625	0	35	106	1	0	8	6.43775177001953	64	662
116	222	0	1	18	32	12	12	355491	1	0	0	0	1	0	0	0	0	0	0	0	0	0	1	0	1	1005	0	46	123	1	1	8	6.91274261474609	64	662
117	225	0	1	11	24	9	11	357519	1	0	0	0	1	0	0	0	0	0	0	0	0	0	1	0	1	725	0	24	109	1	1	7	6.58617162704468	49	662
118	226	0	1	15	27	8	11	367772	1	0	0	0	1	0	0	0	0	0	0	0	0	0	1	0	1	750	0	35	103	1	1	6	6.62007331848145	36	662
119	228	0	1	14	29	NA	8	533828	1	0	0	0	1	0	0	0	0	0	0	0	0	0	1	0	0	529	0	33	108	1	0	9	6.27098846435547	81	662
120	229	0	1	17	29	8	12	496635	1	0	0	0	1	0	0	0	0	0	0	0	0	0	1	0	1	972	0	47	122	1	1	6	6.87935590744019	36	662
121	232	0	1	12	26	12	12	380166	0	0	1	0	1	0	0	0	0	0	0	0	0	0	0	0	1	472	0	36	109	1	1	8	6.15697908401489	64	662
122	233	0	1	12	24	12	12	369567	0	0	1	0	1	0	0	0	0	0	0	0	0	0	1	0	1	325	0	35	102	6	1	6	5.78382539749146	36	662
123	234	0	1	12	34	NA	12	367470	1	0	0	0	1	0	0	0	0	0	0	0	0	0	1	0	1	875	0	44	109	1	1	16	6.77422380447388	256	662
124	237	0	1	13	34	9	10	367470	1	0	0	0	1	0	0	0	0	0	0	0	0	0	1	0	1	625	0	40	100	1	1	15	6.43775177001953	225	662
125	239	0	1	12	26	8	10	380166	1	0	0	0	1	0	0	0	0	0	0	0	0	0	1	0	1	337	0	29	93	1	1	8	5.8200831413269	64	662
126	240	0	1	16	27	5	5	380166	1	0	0	0	1	0	0	0	0	0	0	0	0	0	1	0	1	481	0	37	115	1	1	5	6.17586708068848	25	662
127	241	0	1	9	29	5	NA	551817	1	0	0	0	1	0	0	0	0	0	0	0	0	0	1	0	1	650	0	NA	NA	6	0	14	6.47697257995605	196	662
128	242	0	1	16	25	5	4	369567	1	0	0	0	1	0	0	0	0	0	0	0	0	0	1	0	1	383	0	39	NA	6	0	3	5.94803476333618	9	662
129	244	0	1	18	30	15	14	533828	1	0	0	0	1	0	0	0	0	0	0	0	0	0	1	0	1	962	0	50	125	1	1	6	6.86901426315308	36	662
130	245	0	1	16	29	13	12	496635	1	0	0	0	1	0	0	0	0	0	0	0	0	0	0	0	1	615	0	31	106	6	1	7	6.42162227630615	49	662
131	247	0	1	14	28	12	12	380166	1	0	0	0	1	0	0	0	0	0	0	0	0	0	1	0	1	702	0	43	113	1	1	8	6.55393362045288	64	662
132	249	0	1	14	31	NA	12	551817	1	0	0	0	1	0	0	0	0	0	0	0	0	0	1	0	1	635	0	41	122	6	1	11	6.45362520217896	121	662
133	250	0	1	12	28	10	11	422407	1	0	0	0	1	0	0	0	0	0	0	0	0	0	1	0	1	200	0	35	NA	4	0	10	5.29831743240356	100	662
134	252	0	1	12	27	10	10	380166	1	0	0	0	1	0	0	0	0	0	0	0	0	0	1	0	1	817	0	43	116	1	1	9	6.70563888549805	81	662
135	253	0	1	14	26	NA	12	380166	0	1	0	0	1	0	0	0	0	0	0	0	0	0	1	0	1	577	0	39	116	1	1	6	6.35784244537354	36	662
136	254	0	1	17	26	12	12	760332	1	0	0	0	1	0	0	0	0	0	0	0	0	0	1	0	1	466	0	34	105	1	1	3	6.1441855430603	9	662
137	255	0	1	16	29	NA	12	993271	0	1	0	0	1	0	0	0	0	0	0	0	0	0	1	0	1	924	0	39	NA	1	1	7	6.82871198654175	49	662
138	256	0	1	16	31	12	12	993271	1	0	0	0	1	0	0	0	0	0	0	0	0	0	1	1	0	793	1	38	112	1	0	9	6.67582321166992	81	662
139	257	0	1	14	28	12	12	760332	1	0	0	0	1	0	0	0	0	0	0	0	0	0	1	0	1	635	0	32	113	1	1	8	6.45362520217896	64	662
140	259	0	1	12	25	NA	NA	369567	0	0	0	0	1	0	0	0	0	0	0	0	0	0	1	0	1	570	0	22	NA	6	1	7	6.34563636779785	49	662
141	260	0	1	16	29	12	12	496635	1	0	0	0	1	0	0	0	0	0	0	0	0	0	1	0	1	705	0	37	94	1	1	7	6.55819797515869	49	662
142	261	0	1	14	28	12	9	380166	1	0	0	0	1	0	0	0	0	0	0	0	0	0	1	0	1	635	0	40	103	1	1	8	6.45362520217896	64	662
143	263	0	1	12	30	NA	12	496635	0	0	1	0	1	0	0	0	0	0	0	0	0	0	1	0	1	694	0	36	102	1	0	12	6.54247188568115	144	662
144	264	0	1	13	34	10	12	367470	1	0	0	0	1	0	0	0	0	0	0	0	0	0	1	0	1	615	0	47	109	1	1	15	6.42162227630615	225	662
145	265	0	1	16	26	15	10	380166	1	0	0	0	1	0	0	0	0	0	0	0	0	0	1	0	1	462	0	34	130	6	1	4	6.13556480407715	16	662
146	266	0	1	12	34	12	12	408301	1	0	0	0	1	0	0	0	0	0	0	0	0	0	1	0	1	865	0	45	105	1	1	16	6.76272964477539	256	662
147	267	0	1	18	33	12	12	367470	1	0	0	0	1	0	0	0	0	0	0	0	0	0	1	1	0	737	0	46	134	1	1	9	6.60258769989014	81	662
148	268	0	1	12	25	8	14	357519	1	0	0	0	1	0	0	0	0	0	0	0	0	0	1	0	1	1400	0	39	NA	1	1	7	7.24422740936279	49	662
149	270	0	1	12	31	NA	7	496635	0	1	0	0	1	0	0	0	0	0	0	0	0	0	1	0	1	808	0	43	105	1	0	13	6.69456195831299	169	662
150	272	0	1	16	26	11	12	380166	1	0	0	0	1	0	0	0	0	0	0	0	0	0	1	0	1	654	0	36	104	1	0	4	6.4831075668335	16	662
151	273	0	1	12	25	NA	12	369567	0	1	0	0	1	0	0	0	0	0	0	0	0	0	1	0	1	300	0	35	112	1	1	7	5.70378255844116	49	662
152	275	0	1	16	30	8	10	496635	1	0	0	0	1	0	0	0	0	0	0	0	0	0	1	0	1	577	0	37	115	4	1	8	6.35784244537354	64	662
153	279	0	1	16	24	10	12	410630	1	0	0	0	1	0	0	0	0	0	0	0	0	0	1	0	1	265	0	44	NA	6	1	2	5.57973003387451	4	662
154	280	0	1	18	31	8	8	496635	1	0	0	0	1	0	0	0	0	0	0	0	0	0	0	0	1	594	0	33	117	1	1	7	6.38687944412231	49	662
155	282	0	1	17	26	12	8	380166	1	0	0	0	1	0	0	0	0	0	0	0	0	0	1	0	1	325	0	29	114	1	1	3	5.78382539749146	9	662
156	283	0	1	16	24	12	8	369567	1	0	0	0	1	0	0	0	0	0	0	0	0	0	0	0	1	385	1	37	118	6	1	2	5.95324325561523	4	662
157	284	0	1	18	25	12	12	369567	1	0	0	0	1	0	0	0	0	0	0	0	0	0	1	0	1	1000	0	32	107	1	1	1	6.90775537490845	1	662
158	285	0	1	18	28	8	11	367772	1	0	0	0	1	0	0	0	0	0	0	0	0	0	1	0	1	465	0	49	120	6	1	4	6.1420373916626	16	662
159	286	0	1	16	28	16	18	367772	1	0	0	0	1	0	0	0	0	0	0	0	0	0	1	0	0	440	0	43	131	6	1	6	6.0867748260498	36	662
160	287	0	1	16	27	16	17	367772	1	0	0	0	1	0	0	0	0	0	0	0	0	0	1	0	0	625	0	40	124	6	1	5	6.43775177001953	25	662
161	288	0	1	17	27	11	12	92929	1	0	0	0	1	0	0	0	0	0	0	0	0	0	1	0	1	285	0	36	121	1	1	4	5.65248918533325	16	662
162	290	0	1	14	27	10	12	92929	1	0	0	0	1	0	0	0	0	0	0	0	0	0	1	0	1	650	0	35	110	1	1	7	6.47697257995605	49	662
163	291	0	1	13	25	10	12	90339	1	0	0	0	1	0	0	0	0	0	0	0	0	0	1	0	1	808	0	34	103	1	1	6	6.69456195831299	36	662
164	292	0	1	12	24	10	12	90339	1	0	0	0	1	0	0	0	0	0	0	0	0	0	1	0	1	500	0	26	NA	1	1	6	6.21460819244385	36	662
165	293	0	1	16	26	14	12	367772	1	0	0	0	1	0	0	0	0	0	0	0	0	0	1	0	1	831	0	45	115	1	1	4	6.7226300239563	16	662
166	295	0	1	12	31	8	6	480445	1	0	0	0	1	0	0	0	0	0	0	0	0	0	1	0	1	500	0	33	96	1	1	13	6.21460819244385	169	662
167	297	0	1	17	32	12	12	355491	1	0	0	0	1	0	0	0	0	0	0	0	0	0	1	0	1	693	0	48	123	1	0	9	6.54102993011475	81	662
168	298	0	1	12	27	12	10	367772	1	0	0	0	1	0	0	0	0	0	0	0	0	0	1	0	1	1100	0	37	101	1	1	9	7.00306558609009	81	662
169	300	0	1	12	25	8	12	357519	1	0	0	0	1	0	0	0	0	0	0	0	0	0	1	0	1	763	0	34	98	1	1	7	6.63725805282593	49	662
170	302	1	1	12	27	8	9	422407	1	0	0	1	0	0	0	0	0	0	0	0	0	0	1	0	1	795	0	28	NA	1	1	9	6.67834234237671	81	661
171	304	1	1	16	25	7	8	369567	1	0	0	1	0	0	0	0	0	0	0	0	0	0	1	0	1	333	0	31	108	6	1	3	5.80814266204834	9	661
172	306	1	1	18	30	16	12	551817	1	0	0	1	0	0	0	0	0	0	0	0	0	0	1	0	1	409	0	39	138	1	1	6	6.0137152671814	36	661
173	307	1	1	16	27	NA	12	380166	1	0	0	1	0	0	0	0	0	0	0	0	0	0	1	0	1	865	0	37	121	1	1	5	6.76272964477539	25	661
174	308	1	1	12	31	8	12	496635	1	0	0	1	0	0	0	0	0	0	0	0	0	0	1	0	1	888	0	34	96	1	1	13	6.78897190093994	169	661
175	309	1	1	12	34	NA	12	367470	1	0	0	1	0	0	0	0	0	0	0	0	0	0	1	0	1	673	0	47	89	1	1	16	6.51174545288086	256	661
176	312	1	1	12	33	7	NA	367470	1	0	0	1	0	0	0	0	0	0	0	0	0	0	0	0	1	700	0	43	109	6	1	15	6.55108022689819	225	661
177	313	1	1	18	33	16	16	367470	1	0	0	1	0	0	0	0	0	0	0	0	0	0	1	1	1	250	0	44	133	6	1	9	5.52146100997925	81	661
178	314	1	1	11	27	11	9	380166	1	0	0	1	0	0	0	0	0	0	0	0	0	0	1	0	1	625	0	32	84	6	1	10	6.43775177001953	100	661
179	315	1	1	13	31	8	12	496635	1	0	0	1	0	0	0	0	0	0	0	0	0	0	1	0	1	417	0	37	NA	4	1	12	6.03308629989624	144	661
180	316	1	1	13	28	8	12	380166	1	0	0	1	0	0	0	0	0	0	0	0	0	0	1	0	1	576	0	51	98	1	1	9	6.35610771179199	81	661
181	317	1	1	12	26	12	9	104596	1	0	0	1	0	0	0	0	0	0	0	0	0	1	1	0	1	613	0	27	85	6	1	8	6.41836500167847	64	661
182	318	1	1	12	31	11	9	496635	1	0	0	1	0	0	0	0	0	0	0	0	0	0	1	0	1	700	0	NA	105	1	1	13	6.55108022689819	169	661
183	320	1	1	12	24	11	9	369567	1	0	0	1	0	0	0	0	0	0	0	0	0	0	1	0	1	450	0	20	93	6	1	6	6.10924768447876	36	661
184	322	1	1	16	28	NA	12	380166	0	1	0	1	0	0	0	0	0	0	0	0	0	0	1	0	1	500	0	38	115	1	1	6	6.21460819244385	36	661
185	323	1	1	12	25	12	NA	369567	1	0	0	1	0	0	0	0	0	0	0	0	0	0	0	0	1	514	0	36	NA	1	1	7	6.24222326278687	49	661
186	324	1	1	16	25	12	12	369567	1	0	0	1	0	0	0	0	0	0	0	0	0	0	1	0	1	250	0	45	146	6	1	3	5.52146100997925	9	661
187	325	1	1	12	24	12	12	369567	1	0	0	1	0	0	0	0	0	0	0	0	0	0	0	0	1	315	0	32	NA	6	1	6	5.75257253646851	36	661
188	326	1	1	12	29	9	12	496635	1	0	0	1	0	0	0	0	0	0	0	0	0	0	1	0	1	375	0	32	82	1	1	11	5.92692613601685	121	661
189	330	1	1	15	34	NA	12	408301	0	1	0	1	0	0	0	0	0	0	0	0	0	0	0	0	1	457	0	45	120	1	1	13	6.12468338012695	169	661
190	331	1	1	12	27	NA	NA	104596	0	0	0	1	0	0	0	0	0	0	0	0	0	1	1	0	1	275	0	26	NA	6	0	9	5.61677122116089	81	661
191	332	1	1	12	28	NA	12	92929	0	1	0	1	0	0	0	0	0	0	0	0	0	0	1	0	1	951	0	38	122	1	1	10	6.85751390457153	100	661
192	333	1	1	16	32	8	9	367470	1	0	0	1	0	0	0	0	0	0	0	0	0	0	1	0	0	1115	0	49	NA	1	1	10	7.01660966873169	100	661
193	335	1	1	16	25	12	14	369567	1	0	0	1	0	0	0	0	0	0	0	0	0	0	0	0	1	289	1	31	128	6	1	3	5.66642665863037	9	661
194	336	1	1	16	25	NA	NA	369567	0	0	0	1	0	0	0	0	0	0	0	0	0	0	1	0	1	500	0	34	110	1	1	3	6.21460819244385	9	661
195	339	1	1	18	32	16	12	367470	1	0	0	1	0	0	0	0	0	0	0	0	0	0	1	0	1	726	0	46	114	1	1	8	6.58755016326904	64	661
196	340	1	1	18	29	18	12	480445	1	0	0	1	0	0	0	0	0	0	0	0	0	0	1	0	1	1265	0	48	117	1	1	5	7.14282751083374	25	661
197	341	1	1	17	26	18	18	104596	1	0	0	1	0	0	0	0	0	0	0	0	0	1	1	0	1	613	0	40	109	6	1	3	6.41836500167847	9	661
198	345	0	1	12	28	10	11	380166	1	0	0	1	0	0	0	0	0	0	0	0	0	0	1	0	1	545	0	35	91	6	0	10	6.30078601837158	100	661
199	346	0	1	13	28	12	8	380166	1	0	0	1	0	0	0	0	0	0	0	0	0	0	1	0	1	278	1	32	107	1	1	9	5.62762117385864	81	661
200	348	0	1	18	34	16	12	367470	1	0	0	1	0	0	0	0	0	0	0	0	0	0	1	0	1	1442	0	55	114	1	1	10	7.2737865447998	100	661
201	349	0	1	16	27	16	12	380166	1	0	0	1	0	0	0	0	0	0	0	0	0	0	1	0	1	995	0	40	126	1	1	5	6.90274286270142	25	661
202	350	0	1	12	29	11	11	496635	1	0	0	1	0	0	0	0	0	0	0	0	0	0	1	0	1	700	0	45	82	1	1	11	6.55108022689819	121	661
203	352	0	1	16	28	9	12	380166	1	0	0	1	0	0	0	0	0	0	0	0	0	0	1	0	1	577	0	45	119	1	1	6	6.35784244537354	36	661
204	353	0	1	16	31	6	12	496635	1	0	0	1	0	0	0	0	0	0	0	0	0	0	1	0	1	858	0	37	104	1	1	9	6.75460386276245	81	661
205	355	0	1	12	28	12	NA	380166	0	0	0	1	0	0	0	0	0	0	0	0	0	0	1	0	1	686	0	35	97	1	1	10	6.53087759017944	100	661
206	356	0	1	15	31	11	NA	496635	1	0	0	1	0	0	0	0	0	0	0	0	0	0	1	0	1	832	0	49	115	1	1	10	6.72383260726929	100	661
207	358	1	1	13	33	13	8	367470	1	0	0	1	0	0	0	0	0	0	0	0	0	0	1	0	1	633	1	45	83	1	1	14	6.45047044754028	196	661
208	359	1	1	12	32	12	12	367470	1	0	0	1	0	0	0	0	0	0	0	0	0	0	1	0	1	689	0	45	97	1	1	14	6.53524112701416	196	661
209	360	1	1	14	30	8	8	496635	1	0	0	1	0	0	0	0	0	0	0	0	0	0	1	0	1	769	0	43	119	1	1	10	6.64509105682373	100	661
210	363	1	1	15	27	12	14	367772	1	0	0	1	0	0	0	0	0	0	0	0	0	0	1	0	1	385	0	27	105	6	1	6	5.95324325561523	36	661
211	364	1	1	12	24	12	14	357519	1	0	0	1	0	0	0	0	0	0	0	0	0	0	1	0	1	450	1	29	NA	6	1	6	6.10924768447876	36	661
212	366	1	1	12	27	10	12	380166	1	0	0	1	0	0	0	0	0	0	0	0	0	0	1	0	1	615	0	41	114	1	1	9	6.42162227630615	81	661
213	367	1	1	12	34	NA	8	408301	0	1	0	1	0	0	0	0	0	0	0	0	0	0	1	0	1	682	0	47	93	1	1	16	6.52502965927124	256	661
214	368	1	1	10	32	NA	NA	367470	0	1	0	1	0	0	0	0	0	0	0	0	0	0	1	0	1	670	0	28	73	5	1	16	6.5072774887085	256	661
215	370	1	1	11	33	8	8	367470	1	0	0	1	0	0	0	0	0	0	0	0	0	0	1	0	1	800	0	48	96	1	1	16	6.68461179733276	256	661
216	372	1	1	14	34	8	8	367470	1	0	0	1	0	0	0	0	0	0	0	0	0	0	1	0	1	505	0	48	NA	1	1	14	6.22455835342407	196	661
217	374	1	1	18	30	12	16	496635	1	0	0	1	0	0	0	0	0	0	0	0	0	0	1	0	1	1026	0	48	117	5	1	6	6.93342304229736	36	661
218	375	1	1	15	25	16	12	357519	1	0	0	1	0	0	0	0	0	0	0	0	0	0	1	0	1	769	0	30	113	6	1	4	6.64509105682373	16	661
219	377	1	1	10	32	10	14	408301	1	0	0	1	0	0	0	0	0	0	0	0	0	0	1	1	1	290	0	38	106	1	1	16	5.66988086700439	256	661
220	378	1	1	13	28	NA	8	422407	0	1	0	1	0	0	0	0	0	0	0	0	0	0	1	0	1	529	0	37	104	1	1	9	6.27098846435547	81	661
221	379	1	1	16	29	12	12	496635	1	0	0	1	0	0	0	0	0	0	0	0	0	0	1	0	0	1154	0	NA	NA	1	1	7	7.05098962783813	49	661
222	380	1	1	10	29	12	NA	496635	0	0	0	1	0	0	0	0	0	0	0	0	0	0	1	0	1	549	0	39	80	1	1	13	6.30809831619263	169	661
223	381	1	1	12	26	8	12	380166	1	0	0	1	0	0	0	0	0	0	0	0	0	0	1	0	1	475	0	30	104	1	1	8	6.16331481933594	64	661
224	382	1	1	12	26	12	12	380166	1	0	0	1	0	0	0	0	0	0	0	0	0	0	1	0	1	450	0	36	102	1	1	8	6.10924768447876	64	661
225	383	1	1	17	27	10	NA	380166	0	0	0	1	0	0	0	0	0	0	0	0	0	0	1	0	1	875	0	43	114	6	1	4	6.77422380447388	16	661
226	384	1	1	15	25	10	NA	369567	0	0	0	1	0	0	0	0	0	0	0	0	0	0	1	0	1	200	1	33	93	6	1	4	5.29831743240356	16	661
227	385	1	1	13	26	16	16	380166	1	0	0	1	0	0	0	0	0	0	0	0	0	0	0	0	1	300	0	36	122	6	1	7	5.70378255844116	49	661
228	386	1	1	16	25	16	NA	357519	1	0	0	1	0	0	0	0	0	0	0	0	0	0	0	0	1	462	0	28	117	6	1	3	6.13556480407715	9	661
229	387	1	1	12	30	13	12	496635	1	0	0	1	0	0	0	0	0	0	0	0	0	0	1	0	1	385	0	38	96	1	1	12	5.95324325561523	144	661
230	388	1	1	15	32	16	16	355491	1	0	0	1	0	0	0	0	0	0	0	0	0	0	1	0	1	1282	0	51	95	1	1	11	7.15617656707764	121	661
231	390	1	1	16	25	12	12	357519	1	0	0	1	0	0	0	0	0	0	0	0	0	0	1	0	1	588	0	29	117	6	1	3	6.37672710418701	9	661
232	391	1	1	12	27	17	16	408636	1	0	0	1	0	0	0	0	0	0	0	0	0	0	1	0	1	600	0	24	105	6	1	9	6.39692974090576	81	661
233	393	1	1	16	30	6	NA	121400	0	0	0	1	0	0	0	0	0	0	0	0	0	0	1	0	0	500	1	43	NA	1	0	8	6.21460819244385	64	661
234	396	1	1	12	33	8	8	149854	1	0	0	1	0	0	0	0	0	0	0	0	0	1	1	0	1	440	0	18	94	1	0	15	6.0867748260498	225	661
235	397	0	1	18	26	13	16	380166	1	0	0	0	1	0	0	0	0	0	0	0	0	0	1	1	1	467	1	43	139	6	1	2	6.14632940292358	4	662
236	398	0	1	17	29	14	12	496635	1	0	0	0	1	0	0	0	0	0	0	0	0	0	1	0	1	929	0	41	91	1	1	6	6.83410882949829	36	662
237	399	0	1	16	27	14	12	380166	1	0	0	0	1	0	0	0	0	0	0	0	0	0	1	0	1	556	0	37	96	1	1	5	6.32076835632324	25	662
238	400	0	1	13	24	14	12	369567	1	0	0	0	1	0	0	0	0	0	0	0	0	0	1	0	1	438	0	32	114	6	0	5	6.08221912384033	25	662
239	402	0	1	12	29	9	10	648053	0	0	1	0	1	0	0	0	0	0	0	0	0	1	1	0	1	600	0	31	54	1	0	11	6.39692974090576	121	662
240	403	0	1	12	26	9	10	427892	1	0	0	0	1	0	0	0	0	0	0	0	0	1	1	0	1	575	0	37	69	1	0	8	6.3543701171875	64	662
241	404	0	1	12	26	9	10	427892	1	0	0	0	1	0	0	0	0	0	0	0	0	1	1	0	1	389	0	17	67	6	0	8	5.96357917785645	64	662
242	410	0	1	12	34	12	NA	408207	0	0	1	0	1	0	0	0	0	0	0	0	0	0	0	0	0	795	0	37	110	1	0	16	6.67834234237671	256	662
243	411	0	1	18	27	18	16	422310	1	0	0	0	1	0	0	0	0	0	0	0	0	0	1	0	1	471	0	41	125	1	1	3	6.15485811233521	9	662
244	412	0	1	17	26	18	16	422310	1	0	0	0	1	0	0	0	0	0	0	0	0	0	1	0	1	202	1	38	124	6	1	3	5.30826759338379	9	662
245	413	0	1	17	24	18	16	410536	1	0	0	0	1	0	0	0	0	0	0	0	0	0	1	0	1	200	1	35	NA	6	1	1	5.29831743240356	1	662
246	415	0	1	17	24	15	17	410536	0	0	1	0	1	0	0	0	0	0	0	0	0	0	1	0	1	350	0	35	113	6	1	1	5.85793304443359	1	662
247	416	0	1	14	24	10	12	410536	1	0	0	0	1	0	0	0	0	0	0	0	0	0	0	0	1	375	0	40	100	6	1	4	5.92692613601685	16	662
248	419	0	1	16	25	12	9	410536	1	0	0	0	1	0	0	0	0	0	0	0	0	0	1	0	1	481	0	37	97	1	1	3	6.17586708068848	9	662
249	420	0	1	18	31	8	8	551690	1	0	0	0	1	0	0	0	0	0	0	0	0	0	1	0	1	962	0	44	125	6	1	7	6.86901426315308	49	662
250	421	0	1	15	27	12	12	422310	0	0	1	0	1	0	0	0	0	0	0	0	0	0	1	0	1	423	0	42	106	6	1	6	6.04737234115601	36	662
251	423	0	1	15	27	11	12	422310	1	0	0	0	1	0	0	0	0	0	0	0	0	0	1	0	1	500	0	28	101	6	1	6	6.21460819244385	36	662
252	424	0	1	9	30	NA	11	551690	1	0	0	0	1	0	0	0	0	0	0	0	0	0	1	0	1	450	0	37	NA	1	1	15	6.10924768447876	225	662
253	425	0	1	8	28	8	9	327808	1	0	0	0	1	0	0	0	0	0	0	0	0	0	1	0	1	476	0	27	NA	1	0	14	6.16541767120361	196	662
254	426	0	1	12	24	8	9	318670	1	0	0	0	1	0	0	0	0	0	0	0	0	0	1	0	1	136	0	21	NA	6	0	6	4.91265487670898	36	662
255	427	0	1	12	32	10	9	345723	1	0	0	0	1	0	0	0	0	0	0	0	0	0	1	0	0	575	0	39	91	1	1	14	6.3543701171875	196	662
256	428	0	1	12	33	10	8	345723	0	0	0	0	1	0	0	0	0	0	0	0	0	0	1	0	0	577	0	28	86	1	1	15	6.35784244537354	225	662
257	429	0	1	12	31	8	9	475820	1	0	0	0	1	0	0	0	0	0	0	0	0	0	1	0	1	310	0	32	110	1	1	13	5.736572265625	169	662
258	430	0	1	9	30	12	12	428238	1	0	0	0	1	0	0	0	0	0	0	0	0	0	1	0	1	700	0	38	NA	1	0	15	6.55108022689819	225	662
259	433	0	1	14	32	NA	12	453563	1	0	0	1	0	0	0	0	0	0	0	0	0	0	1	0	0	1322	0	47	92	1	1	12	7.1869010925293	144	661
260	434	0	1	10	34	12	9	408207	1	0	0	1	0	0	0	0	0	0	0	0	0	0	1	0	0	551	0	41	85	1	0	18	6.31173467636108	324	661
261	435	0	1	17	30	8	8	551690	1	0	0	1	0	0	0	0	0	0	0	0	0	0	1	0	1	881	0	36	120	1	1	7	6.78105783462524	49	661
262	439	0	1	12	25	7	12	410536	1	0	0	1	0	0	0	0	0	0	0	0	0	0	1	0	1	760	0	27	NA	1	1	7	6.63331842422485	49	661
263	441	0	1	12	32	8	11	453563	1	0	0	1	0	0	0	0	0	0	0	0	0	0	1	0	1	708	0	52	NA	1	1	14	6.56244421005249	196	661
264	442	0	1	12	26	8	8	422310	1	0	0	1	0	0	0	0	0	0	0	0	0	0	1	0	1	425	0	24	NA	1	1	8	6.05208921432495	64	661
265	443	0	1	12	26	NA	9	422310	0	1	0	1	0	0	0	0	0	0	0	0	0	0	1	0	1	427	0	35	107	6	1	8	6.05678415298462	64	661
266	444	0	1	16	24	NA	9	410536	0	1	0	1	0	0	0	0	0	0	0	0	0	0	1	0	1	576	0	43	116	6	1	2	6.35610771179199	4	661
267	446	0	1	9	32	NA	4	453563	1	0	0	1	0	0	0	0	0	0	0	0	0	0	1	0	1	400	0	34	NA	4	1	17	5.99146461486816	289	661
268	449	0	1	12	31	8	5	551690	1	0	0	1	0	0	0	0	0	0	0	0	0	0	0	0	1	500	0	30	NA	1	0	13	6.21460819244385	169	661
269	450	0	1	12	28	8	5	422310	1	0	0	1	0	0	0	0	0	0	0	0	0	0	0	0	1	531	0	29	NA	1	0	10	6.27476215362549	100	661
270	453	0	1	16	28	12	12	422310	1	0	0	1	0	0	0	0	0	0	0	0	0	0	1	0	0	673	1	43	121	1	1	6	6.51174545288086	36	661
271	454	0	1	16	27	12	12	422310	1	0	0	1	0	0	0	0	0	0	0	0	0	0	1	1	0	577	0	41	112	6	1	5	6.35784244537354	25	661
272	458	0	1	16	24	16	12	410536	1	0	0	1	0	0	0	0	0	0	0	0	0	0	1	0	1	325	0	39	NA	6	1	2	5.78382539749146	4	661
273	461	0	1	11	29	7	11	428238	1	0	0	1	0	0	0	0	0	0	0	0	0	0	0	0	0	500	0	40	NA	1	1	12	6.21460819244385	144	661
274	462	0	1	12	25	7	11	318670	1	0	0	1	0	0	0	0	0	0	0	0	0	0	0	0	0	770	0	43	100	1	1	7	6.64639043807983	49	661
275	464	0	1	12	26	7	12	327808	1	0	0	1	0	0	0	0	0	0	0	0	0	0	1	0	0	500	0	37	112	1	0	8	6.21460819244385	64	661
276	467	0	1	16	28	14	12	327808	1	0	0	1	0	0	0	0	0	0	0	0	0	0	1	0	1	391	0	41	108	1	1	6	5.96870756149292	36	661
277	468	0	1	12	34	12	10	352069	1	0	0	1	0	0	0	0	0	0	0	0	0	0	1	0	1	810	0	42	90	1	1	16	6.69703435897827	256	661
278	469	1	1	9	34	12	NA	166467	1	0	0	0	1	0	0	0	0	0	0	0	0	1	0	0	0	543	0	39	86	1	1	19	6.29710912704468	361	662
279	473	1	1	9	34	12	12	196733	1	0	0	0	1	0	0	0	0	0	0	0	0	1	0	0	0	593	0	37	NA	5	1	19	6.38519430160522	361	662
280	474	1	1	17	25	12	12	100353	1	0	0	0	1	0	0	0	0	0	0	0	0	0	1	0	0	864	0	40	127	6	1	2	6.76157283782959	4	662
281	475	1	1	10	28	NA	8	116191	1	0	0	0	1	0	0	0	0	0	0	0	0	1	0	0	0	700	0	32	86	1	1	12	6.55108022689819	144	662
282	477	1	1	12	25	12	12	410536	1	0	0	0	1	0	0	0	0	0	0	0	0	0	0	0	0	510	0	27	113	1	1	7	6.23441076278687	49	662
283	479	1	1	13	34	9	12	316862	1	0	0	0	1	0	0	0	0	0	0	0	0	0	1	0	1	615	0	51	111	4	1	15	6.42162227630615	225	662
284	481	1	1	14	29	9	8	428238	1	0	0	0	1	0	0	0	0	0	0	0	0	0	1	0	0	761	0	41	113	1	0	9	6.63463354110718	81	662
285	484	1	1	10	31	NA	NA	551817	1	0	0	0	1	0	0	0	0	0	0	0	0	0	1	0	1	493	0	32	81	1	1	15	6.2005090713501	225	662
286	485	1	1	16	24	12	12	369567	1	0	0	0	1	0	0	0	0	0	0	0	0	0	1	0	1	445	0	34	111	1	1	2	6.09807443618774	4	662
287	486	1	1	12	25	8	9	369567	1	0	0	0	1	0	0	0	0	0	0	0	0	0	1	0	1	425	0	20	NA	1	1	7	6.05208921432495	49	662
288	487	1	1	16	24	12	12	357519	1	0	0	0	1	0	0	0	0	0	0	0	0	0	1	0	1	750	1	24	112	6	1	2	6.62007331848145	4	662
289	488	1	1	16	24	12	12	357519	1	0	0	0	1	0	0	0	0	0	0	0	0	0	1	0	1	700	0	30	114	1	1	2	6.55108022689819	4	662
290	489	1	1	12	24	9	9	357519	1	0	0	0	1	0	0	0	0	0	0	0	0	0	1	0	1	438	0	33	NA	1	1	6	6.08221912384033	36	662
291	490	1	1	12	29	12	12	480445	1	0	0	0	1	0	0	0	0	0	0	0	0	0	1	0	1	608	0	30	111	1	1	11	6.41017484664917	121	662
292	491	1	1	13	24	7	8	357519	1	0	0	0	1	0	0	0	0	0	0	0	0	0	1	0	1	450	0	32	106	1	0	5	6.10924768447876	25	662
293	492	1	1	3	26	4	0	422407	1	0	0	0	1	0	0	0	0	0	0	0	0	0	1	0	1	313	0	6	NA	1	0	17	5.74620342254639	289	662
294	494	1	1	7	33	6	5	177101	1	0	0	0	1	0	0	0	0	0	0	0	0	1	1	0	1	250	0	NA	NA	1	0	20	5.52146100997925	400	662
295	496	1	1	14	33	12	12	367470	1	0	0	0	1	0	0	0	0	0	0	0	0	0	1	0	1	500	0	26	79	1	0	13	6.21460819244385	169	662
296	497	0	0	12	26	11	12	422310	1	0	0	0	1	0	0	0	0	0	0	0	0	0	1	0	0	365	0	28	98	6	1	8	5.89989757537842	64	662
297	499	0	0	12	26	10	12	364232	1	0	0	0	1	0	0	0	0	0	0	0	0	0	1	0	0	813	0	28	105	1	1	8	6.70073127746582	64	662
298	500	0	0	12	25	10	12	354077	1	0	0	0	1	0	0	0	0	0	0	0	0	0	0	0	0	326	0	33	NA	4	1	7	5.7868971824646	49	662
299	501	0	0	12	29	NA	10	428238	0	1	0	0	1	0	0	0	0	0	0	0	0	0	0	0	0	524	0	29	105	1	0	11	6.2614917755127	121	662
300	502	0	0	13	28	9	12	327808	1	0	0	0	1	0	0	0	0	0	0	0	0	0	1	0	0	815	0	44	118	1	1	9	6.70318794250488	81	662
301	504	0	0	12	28	11	12	327808	0	0	1	0	1	0	0	0	0	0	0	0	0	0	1	0	1	750	0	35	100	1	1	10	6.62007331848145	100	662
302	505	0	0	17	24	9	10	318670	1	0	0	0	1	0	0	0	0	0	0	0	0	0	1	0	1	525	0	36	NA	1	1	1	6.26339817047119	1	662
303	506	0	0	12	32	8	12	316862	1	0	0	0	1	0	0	0	0	0	0	0	0	0	1	0	1	1125	0	38	90	1	1	14	7.02553844451904	196	662
304	508	0	0	12	28	8	9	327808	1	0	0	0	1	0	0	0	0	0	0	0	0	0	1	0	1	625	0	34	95	6	1	10	6.43775177001953	100	662
305	509	0	0	14	25	12	12	354077	1	0	0	0	1	0	0	0	0	0	0	0	0	0	1	0	1	715	0	24	112	1	1	5	6.57228231430054	25	662
306	510	0	0	12	31	8	12	428238	1	0	0	0	1	0	0	0	0	0	0	0	0	0	0	0	0	591	0	32	96	1	1	13	6.38181591033936	169	662
307	512	0	0	17	27	12	12	321899	1	0	0	0	1	0	0	0	0	0	0	0	0	0	1	0	1	404	1	37	127	6	1	4	6.00141477584839	16	662
308	514	0	1	12	28	10	12	422310	1	0	0	1	0	0	0	0	0	0	0	0	0	0	1	0	1	675	0	39	120	1	1	10	6.51471281051636	100	661
309	515	0	1	12	25	10	12	410536	1	0	0	1	0	0	0	0	0	0	0	0	0	0	1	0	1	444	0	41	123	6	1	7	6.09582471847534	49	661
310	516	0	1	12	24	10	12	410536	1	0	0	1	0	0	0	0	0	0	0	0	0	0	1	0	1	488	0	34	NA	1	1	6	6.19031524658203	36	661
311	517	0	1	9	34	10	6	408207	1	0	0	1	0	0	0	0	0	0	0	0	0	0	1	0	1	695	0	42	NA	1	1	19	6.54391193389893	361	661
312	518	0	1	12	25	10	12	410536	1	0	0	1	0	0	0	0	0	0	0	0	0	0	1	1	1	700	1	25	98	1	0	7	6.55108022689819	49	661
313	519	0	1	12	24	7	10	410536	1	0	0	1	0	0	0	0	0	0	0	0	0	0	1	1	1	325	0	24	NA	1	0	6	5.78382539749146	36	661
314	520	0	1	9	25	12	11	410536	1	0	0	1	0	0	0	0	0	0	0	0	0	0	1	0	1	556	0	30	NA	1	1	10	6.32076835632324	100	661
315	522	1	1	12	26	8	12	380166	1	0	0	0	1	0	0	0	0	0	0	0	0	0	1	0	1	325	0	25	114	6	1	8	5.78382539749146	64	662
316	523	1	1	13	26	15	16	380166	1	0	0	0	1	0	0	0	0	0	0	0	0	0	1	0	1	668	0	32	103	1	1	7	6.50428819656372	49	662
317	524	1	1	18	31	18	16	496635	1	0	0	0	1	0	0	0	0	0	0	0	0	0	1	0	0	2404	0	40	121	1	1	7	7.78488922119141	49	662
318	525	1	1	16	25	12	14	410630	1	0	0	0	1	0	0	0	0	0	0	0	0	0	1	0	1	758	1	38	117	6	0	3	6.63068342208862	9	662
319	526	1	1	16	34	12	12	367470	1	0	0	0	1	0	0	0	0	0	0	0	0	0	1	0	1	986	0	44	90	1	1	12	6.8936562538147	144	662
320	527	1	1	12	25	12	12	410630	1	0	0	0	1	0	0	0	0	0	0	0	0	0	1	0	1	577	0	32	125	1	1	7	6.35784244537354	49	662
321	529	1	1	17	29	12	12	496635	1	0	0	0	1	0	0	0	0	0	0	0	0	0	0	0	1	286	0	39	104	1	1	6	5.65599203109741	36	662
322	531	1	1	14	28	18	16	380166	1	0	0	0	1	0	0	0	0	0	0	0	0	0	1	1	1	231	0	40	106	6	1	8	5.44241762161255	64	662
323	532	1	1	12	25	7	10	369567	1	0	0	0	1	0	0	0	0	0	0	0	0	0	1	0	1	513	0	33	NA	1	1	7	6.24027585983276	49	662
324	533	1	1	15	28	9	10	380166	1	0	0	0	1	0	0	0	0	0	0	0	0	0	1	0	1	615	0	36	122	4	1	7	6.42162227630615	49	662
325	534	1	1	15	25	9	10	369567	1	0	0	0	1	0	0	0	0	0	0	0	0	0	1	0	1	700	0	43	120	1	1	4	6.55108022689819	16	662
326	537	1	1	18	33	12	7	408301	1	0	0	0	1	0	0	0	0	0	0	0	0	0	1	0	1	714	0	41	112	1	1	9	6.57088279724121	81	662
327	539	1	1	9	30	8	8	121400	1	0	0	0	1	0	0	0	0	0	0	0	0	0	1	0	1	701	0	31	NA	1	0	15	6.55250787734985	225	662
328	540	1	1	12	24	7	9	102031	1	0	0	0	1	0	0	0	0	0	0	0	0	1	1	0	1	462	0	29	NA	1	1	6	6.13556480407715	36	662
329	542	1	1	18	28	8	9	380166	1	0	0	0	1	0	0	0	0	0	0	0	0	0	1	0	1	868	0	34	109	6	1	4	6.76619148254395	16	662
330	544	1	1	16	29	9	10	496635	1	0	0	0	1	0	0	0	0	0	0	0	0	0	0	0	1	917	0	46	128	6	1	7	6.82110738754272	49	662
331	545	1	1	12	27	12	12	380166	1	0	0	0	1	0	0	0	0	0	0	0	0	0	1	0	1	1065	0	35	97	1	1	9	6.97073030471802	81	662
332	546	0	1	12	29	12	12	496635	1	0	0	1	0	0	0	0	0	0	0	0	0	0	1	1	1	400	0	35	96	4	1	11	5.99146461486816	121	661
333	547	0	1	12	27	12	12	367772	1	0	0	1	0	0	0	0	0	0	0	0	0	0	1	0	1	640	0	41	103	1	1	9	6.46146821975708	81	661
334	548	0	1	13	24	8	8	357519	1	0	0	1	0	0	0	0	0	0	0	0	0	0	1	0	1	285	0	16	NA	6	0	5	5.65248918533325	25	661
335	551	0	1	17	27	12	12	367772	1	0	0	1	0	0	0	0	0	0	0	0	0	0	1	1	1	641	1	38	127	6	1	4	6.46302938461304	16	661
336	561	1	1	13	32	NA	4	367470	1	0	0	0	1	0	0	0	0	0	0	0	0	0	1	0	1	389	0	21	NA	1	0	13	5.96357917785645	169	662
337	562	1	1	12	25	12	10	369567	1	0	0	0	1	0	0	0	0	0	0	0	0	0	1	0	1	1010	0	29	NA	1	1	7	6.91770553588867	49	662
338	564	1	1	12	24	8	12	90339	1	0	0	0	1	0	0	0	0	0	0	0	0	0	0	0	1	817	0	44	97	1	1	6	6.70563888549805	36	662
339	565	1	1	17	27	10	9	92929	1	0	0	0	1	0	0	0	0	0	0	0	0	0	1	0	1	975	0	43	120	1	1	4	6.88243770599365	16	662
340	567	1	1	12	29	6	7	158413	1	0	0	0	1	0	0	0	0	0	0	0	0	1	1	0	1	750	0	21	78	4	1	11	6.62007331848145	121	662
341	570	1	1	15	24	7	8	90339	1	0	0	0	1	0	0	0	0	0	0	0	0	0	0	0	1	463	0	46	118	1	1	3	6.1377272605896	9	662
342	571	1	1	12	28	12	NA	380166	1	0	0	0	1	0	0	0	0	0	0	0	0	0	1	0	1	1387	0	NA	NA	1	1	10	7.23489856719971	100	662
343	572	1	1	12	25	12	NA	369567	1	0	0	0	1	0	0	0	0	0	0	0	0	0	1	0	1	577	0	41	NA	6	1	7	6.35784244537354	49	662
344	575	1	1	12	27	11	9	380166	1	0	0	0	1	0	0	0	0	0	0	0	0	0	1	0	1	401	0	27	89	6	1	9	5.99396133422852	81	662
345	576	1	1	10	26	11	9	380166	1	0	0	0	1	0	0	0	0	0	0	0	0	0	1	0	1	320	0	24	NA	1	1	10	5.76832103729248	100	662
346	581	1	1	12	27	14	12	422407	1	0	0	0	1	0	0	0	0	0	0	0	0	0	1	0	1	514	0	36	NA	1	1	9	6.24222326278687	81	662
347	582	1	1	11	25	14	12	410630	1	0	0	0	1	0	0	0	0	0	0	0	0	0	1	0	1	208	0	NA	NA	6	1	8	5.33753824234009	64	662
348	583	1	1	17	27	8	6	380166	1	0	0	0	1	0	0	0	0	0	0	0	0	0	1	0	1	1192	1	50	122	1	1	4	7.08338785171509	16	662
349	584	1	1	14	26	7	6	380166	1	0	0	0	1	0	0	0	0	0	0	0	0	0	1	0	1	625	0	33	98	6	0	6	6.43775177001953	36	662
350	585	1	1	17	34	7	7	367470	1	0	0	0	1	0	0	0	0	0	0	0	0	0	1	0	1	481	0	44	NA	1	0	11	6.17586708068848	121	662
351	588	1	1	13	27	12	12	380166	1	0	0	0	1	0	0	0	0	0	0	0	0	0	1	0	1	714	1	18	101	1	1	8	6.57088279724121	64	662
352	590	1	1	11	27	1	4	380166	1	0	0	0	1	0	0	0	0	0	0	0	0	0	1	0	1	625	0	30	NA	1	1	10	6.43775177001953	100	662
353	591	1	1	12	30	NA	7	496635	1	0	0	0	1	0	0	0	0	0	0	0	0	0	1	0	1	553	0	39	112	1	1	12	6.31535816192627	144	662
354	592	1	1	12	34	5	2	367470	1	0	0	0	1	0	0	0	0	0	0	0	0	0	1	0	1	579	0	32	88	1	1	16	6.36130237579346	256	662
355	593	1	1	18	28	12	16	380166	1	0	0	0	1	0	0	0	0	0	0	0	0	0	1	0	1	841	0	52	NA	6	0	4	6.73459148406982	16	662
356	594	1	1	18	33	12	12	367470	1	0	0	0	1	0	0	0	0	0	0	0	0	0	1	0	1	1923	0	48	136	1	1	9	7.56164169311523	81	662
357	598	1	1	16	26	13	10	380166	1	0	0	0	1	0	0	0	0	0	0	0	0	0	1	0	1	806	0	50	124	1	1	4	6.69208383560181	16	662
358	601	1	1	12	29	NA	6	158413	0	1	0	0	1	0	0	0	0	0	0	0	0	1	1	0	1	344	0	31	96	1	0	11	5.84064149856567	121	662
359	605	1	1	12	32	11	14	367470	1	0	0	0	1	0	0	0	0	0	0	0	0	0	1	0	1	962	0	39	97	1	1	14	6.86901426315308	196	662
360	612	1	1	12	32	10	10	367470	1	0	0	0	1	0	0	0	0	0	0	0	0	0	0	0	1	600	0	40	NA	1	1	14	6.39692974090576	196	662
361	615	1	1	18	34	12	10	408301	1	0	0	0	1	0	0	0	0	0	0	0	0	0	1	0	1	837	0	49	107	1	1	10	6.72982406616211	100	662
362	616	1	1	16	24	NA	NA	410630	0	0	0	0	1	0	0	0	0	0	0	0	0	0	1	0	1	625	0	41	NA	6	1	2	6.43775177001953	4	662
363	617	1	1	16	28	NA	NA	422407	1	0	0	0	1	0	0	0	0	0	0	0	0	0	1	0	1	563	0	41	111	1	1	6	6.33327960968018	36	662
364	618	1	1	16	28	10	10	380166	1	0	0	0	1	0	0	0	0	0	0	0	0	0	1	0	1	1410	0	43	102	1	1	6	7.25134515762329	36	662
365	619	1	1	12	25	NA	12	90339	1	0	0	0	1	0	0	0	0	0	0	0	0	0	1	0	1	480	0	30	115	1	1	7	6.17378616333008	49	662
366	621	1	1	12	24	7	8	90339	1	0	0	0	1	0	0	0	0	0	0	0	0	0	1	0	1	600	1	32	94	6	1	6	6.39692974090576	36	662
367	623	1	1	9	28	NA	0	92929	0	1	0	0	1	0	0	0	0	0	0	0	0	0	1	0	1	300	0	30	NA	1	0	13	5.70378255844116	169	662
368	624	1	1	9	25	NA	0	90339	0	1	0	0	1	0	0	0	0	0	0	0	0	0	1	0	1	505	0	20	NA	1	0	10	6.22455835342407	100	662
369	626	1	1	14	25	7	12	102031	1	0	0	0	1	0	0	0	0	0	0	0	0	1	1	0	1	417	0	31	92	6	1	5	6.03308629989624	25	662
370	627	1	1	12	24	7	12	102031	1	0	0	0	1	0	0	0	0	0	0	0	0	1	1	0	1	300	0	27	NA	1	1	6	5.70378255844116	36	662
371	628	1	1	18	27	14	14	380166	1	0	0	0	1	0	0	0	0	0	0	0	0	0	1	0	1	865	0	37	NA	6	1	3	6.76272964477539	9	662
372	629	1	1	16	25	16	13	369567	1	0	0	0	1	0	0	0	0	0	0	0	0	0	1	0	1	300	0	33	116	6	1	3	5.70378255844116	9	662
373	635	1	1	12	32	9	6	367470	1	0	0	0	1	0	0	0	0	0	0	0	0	0	1	0	1	721	0	41	101	1	1	14	6.58063936233521	196	662
374	640	1	1	12	34	8	NA	367470	1	0	0	0	1	0	0	0	0	0	0	0	0	0	1	0	1	856	0	32	99	1	1	16	6.75227022171021	256	662
375	641	1	1	10	30	10	7	496635	1	0	0	0	1	0	0	0	0	0	0	0	0	0	1	0	1	738	0	42	106	1	1	14	6.60394382476807	196	662
376	644	1	1	17	31	15	12	648053	0	0	0	0	1	0	0	0	0	0	0	0	0	1	1	0	1	1058	0	40	NA	1	1	8	6.96413564682007	64	662
377	647	1	1	12	32	6	8	681157	1	0	0	0	1	0	0	0	0	0	0	0	0	1	1	0	1	529	0	25	NA	6	0	14	6.27098846435547	196	662
378	648	1	1	11	34	6	NA	367470	0	0	1	0	1	0	0	0	0	0	0	0	0	0	1	0	1	572	0	30	122	1	1	17	6.34913921356201	289	662
379	649	1	1	12	32	NA	9	367470	1	0	0	0	1	0	0	0	0	0	0	0	0	0	0	0	1	805	0	32	88	1	1	14	6.69084215164185	196	662
380	651	1	1	10	30	6	8	496635	1	0	0	0	1	0	0	0	0	0	0	0	0	0	1	0	1	400	0	28	59	6	1	14	5.99146461486816	196	662
381	652	1	1	18	29	12	16	496635	1	0	0	0	1	0	0	0	0	0	0	0	0	0	1	0	1	962	0	48	126	1	1	5	6.86901426315308	25	662
382	653	1	1	18	27	13	16	380166	1	0	0	0	1	0	0	0	0	0	0	0	0	0	1	0	1	817	0	40	126	6	1	3	6.70563888549805	9	662
383	654	1	1	13	28	14	12	380166	1	0	0	0	1	0	0	0	0	0	0	0	0	0	1	0	1	740	0	47	NA	1	1	9	6.60665035247803	81	662
384	655	1	1	18	30	12	12	496635	1	0	0	0	1	0	0	0	0	0	0	0	0	0	1	0	1	721	0	54	105	1	1	6	6.58063936233521	36	662
385	658	1	1	18	24	16	16	369567	1	0	0	0	1	0	0	0	0	0	0	0	0	0	1	0	1	913	0	29	123	6	1	0	6.81673574447632	0	662
386	662	1	1	17	27	8	12	380166	1	0	0	0	1	0	0	0	0	0	0	0	0	0	1	0	1	379	0	30	119	6	1	4	5.93753623962402	16	662
387	663	1	1	14	26	8	12	380166	0	0	0	0	1	0	0	0	0	0	0	0	0	0	1	0	1	350	0	35	108	6	1	6	5.85793304443359	36	662
388	667	1	1	11	33	8	8	367470	1	0	0	0	1	0	0	0	0	0	0	0	0	0	1	0	1	694	0	36	93	6	1	16	6.54247188568115	256	662
389	669	1	1	12	32	NA	12	367470	1	0	0	0	1	0	0	0	0	0	0	0	0	0	1	1	1	1014	0	38	82	4	1	14	6.92165803909302	196	662
390	671	1	1	18	34	16	16	613041	1	0	0	0	1	0	0	0	0	0	0	0	0	0	1	0	1	1136	0	49	123	1	1	10	7.03526878356934	100	662
391	673	1	1	18	30	16	16	648053	1	0	0	0	1	0	0	0	0	0	0	0	0	0	1	0	1	1709	0	45	134	1	1	6	7.44366359710693	36	662
392	675	1	1	12	26	12	8	109826	1	0	0	0	1	0	0	0	0	0	0	0	0	0	1	0	1	529	0	29	84	1	1	8	6.27098846435547	64	662
393	676	1	1	17	32	12	16	149854	1	0	0	0	1	0	0	0	0	0	0	0	0	1	1	0	1	673	0	38	101	6	1	9	6.51174545288086	81	662
394	677	1	1	17	28	16	13	380166	1	0	0	0	1	0	0	0	0	0	0	0	0	0	1	0	1	1010	1	45	125	4	1	5	6.91770553588867	25	662
395	679	1	1	18	28	17	12	380166	1	0	0	0	1	0	0	0	0	0	0	0	0	0	1	0	0	846	0	43	117	1	1	4	6.74051952362061	16	662
396	680	1	1	11	27	12	12	380166	1	0	0	0	1	0	0	0	0	0	0	0	0	0	1	0	1	710	0	36	98	1	1	10	6.56526517868042	100	662
397	681	1	1	16	26	12	13	380166	1	0	0	0	1	0	0	0	0	0	0	0	0	0	0	0	1	820	0	41	118	1	1	4	6.70930433273315	16	662
398	682	1	1	12	24	12	13	369567	1	0	0	0	1	0	0	0	0	0	0	0	0	0	1	0	1	447	0	NA	NA	6	1	6	6.10255861282349	36	662
399	685	1	1	15	25	9	10	369567	1	0	0	0	1	0	0	0	0	0	0	0	0	0	1	0	1	500	0	26	129	1	1	4	6.21460819244385	16	662
400	686	1	1	16	31	12	12	551817	1	0	0	0	1	0	0	0	0	0	0	0	0	0	1	0	1	1049	0	44	96	1	1	9	6.9555926322937	81	662
401	687	1	1	18	29	16	12	496635	1	0	0	0	1	0	0	0	0	0	0	0	0	0	1	0	1	1202	0	40	124	1	1	5	7.09174203872681	25	662
402	689	1	1	12	33	8	NA	367470	1	0	0	0	1	0	0	0	0	0	0	0	0	0	1	0	1	690	0	27	NA	1	1	15	6.53669166564941	225	662
403	692	1	1	16	28	8	10	380166	1	0	0	0	1	0	0	0	0	0	0	0	0	0	1	0	1	648	0	42	122	1	1	6	6.47389078140259	36	662
404	695	1	1	13	30	12	12	496635	1	0	0	0	1	0	0	0	0	0	0	0	0	0	1	0	1	875	0	37	85	1	1	11	6.77422380447388	121	662
405	703	1	1	17	25	12	12	369567	1	0	0	0	1	0	0	0	0	0	0	0	0	0	1	0	1	548	1	39	112	1	1	2	6.30627536773682	4	662
406	704	1	1	7	28	8	9	380166	1	0	0	0	1	0	0	0	0	0	0	0	0	0	1	0	1	600	0	30	NA	1	0	15	6.39692974090576	225	662
407	705	1	1	15	34	12	8	367470	1	0	0	0	1	0	0	0	0	0	0	0	0	0	1	0	1	2244	0	45	111	1	1	13	7.71601533889771	169	662
408	706	1	1	12	31	12	8	496635	1	0	0	0	1	0	0	0	0	0	0	0	0	0	1	0	1	1442	0	42	90	1	1	13	7.2737865447998	169	662
409	708	1	1	12	34	NA	NA	149854	0	0	0	0	1	0	0	0	0	0	0	0	0	1	1	0	1	320	0	38	NA	1	1	16	5.76832103729248	256	662
410	709	1	1	18	33	10	16	367470	1	0	0	0	1	0	0	0	0	0	0	0	0	0	1	0	1	1262	0	43	101	1	1	9	7.14045286178589	81	662
411	710	1	1	12	24	11	9	369567	0	0	1	0	1	0	0	0	0	0	0	0	0	0	1	0	1	600	0	18	100	1	1	6	6.39692974090576	36	662
412	711	1	1	11	26	NA	10	475436	1	0	0	0	1	0	0	0	0	0	0	0	0	1	1	0	1	300	0	25	95	6	0	9	5.70378255844116	81	662
413	714	1	1	16	24	12	12	369567	1	0	0	0	1	0	0	0	0	0	0	0	0	0	1	0	1	538	0	44	120	6	1	2	6.28785848617554	4	662
414	715	1	1	12	33	11	NA	408301	1	0	0	0	1	0	0	0	0	0	0	0	0	0	0	0	1	744	0	44	NA	1	1	15	6.61204099655151	225	662
415	717	1	1	12	33	NA	12	367470	0	1	0	0	1	0	0	0	0	0	0	0	0	0	1	0	1	846	1	36	101	1	1	15	6.74051952362061	225	662
416	719	1	1	16	29	12	12	480445	1	0	0	0	1	0	0	0	0	0	0	0	0	0	1	0	1	813	0	44	NA	1	1	7	6.70073127746582	49	662
417	721	1	1	12	28	NA	8	380166	1	0	0	0	1	0	0	0	0	0	0	0	0	0	1	0	1	1000	0	34	90	1	0	10	6.90775537490845	100	662
418	727	1	1	16	26	12	15	380166	1	0	0	0	1	0	0	0	0	0	0	0	0	0	1	0	1	561	0	34	122	1	1	4	6.32972097396851	16	662
419	729	1	1	18	26	18	18	380166	1	0	0	0	1	0	0	0	0	0	0	0	0	0	1	0	1	285	0	41	140	6	1	2	5.65248918533325	4	662
420	732	1	1	16	27	16	12	380166	1	0	0	0	1	0	0	0	0	0	0	0	0	0	1	0	1	437	0	37	106	1	1	5	6.07993316650391	25	662
421	733	1	1	13	25	12	12	369567	1	0	0	0	1	0	0	0	0	0	0	0	0	0	1	0	1	325	0	27	93	6	0	6	5.78382539749146	36	662
422	734	1	1	16	28	10	12	380166	1	0	0	0	1	0	0	0	0	0	0	0	0	0	1	0	1	580	0	30	119	1	1	6	6.36302804946899	36	662
423	735	1	1	16	26	12	12	104596	1	0	0	0	1	0	0	0	0	0	0	0	0	1	1	0	1	588	0	33	95	4	1	4	6.37672710418701	16	662
424	742	1	1	18	29	14	12	496635	1	0	0	0	1	0	0	0	0	0	0	0	0	0	1	0	1	801	0	44	115	1	1	5	6.68586111068726	25	662
425	747	1	1	14	25	8	10	369567	1	0	0	0	1	0	0	0	0	0	0	0	0	0	1	0	1	312	0	32	119	6	1	5	5.74300336837769	25	662
426	749	1	1	12	29	4	11	158413	0	0	1	0	1	0	0	0	0	0	0	0	0	1	1	0	1	250	0	19	67	6	0	11	5.52146100997925	121	662
427	750	1	1	15	27	4	11	104596	0	0	1	0	1	0	0	0	0	0	0	0	0	1	1	0	1	500	0	34	97	5	0	6	6.21460819244385	36	662
428	751	1	1	12	33	NA	12	149854	0	1	0	0	1	0	0	0	0	0	0	0	0	1	1	0	1	750	0	28	111	1	1	15	6.62007331848145	225	662
429	752	1	1	13	31	11	11	496635	1	0	0	0	1	0	0	0	0	0	0	0	0	0	1	1	1	343	1	41	101	1	1	12	5.83773040771484	144	662
430	753	1	1	15	28	11	11	380166	1	0	0	0	1	0	0	0	0	0	0	0	0	0	1	0	1	250	0	32	112	4	NA	7	5.52146100997925	49	662
431	754	1	1	16	24	12	10	369567	1	0	0	0	1	0	0	0	0	0	0	0	0	0	1	0	1	700	1	26	107	1	1	2	6.55108022689819	4	662
432	756	1	1	12	25	8	8	369567	1	0	0	0	1	0	0	0	0	0	0	0	0	0	1	0	1	400	0	22	93	6	0	7	5.99146461486816	49	662
433	757	1	1	17	27	14	12	380166	1	0	0	0	1	0	0	0	0	0	0	0	0	0	1	0	1	555	0	37	122	1	1	4	6.31896829605103	16	662
434	758	1	1	15	28	12	12	380166	1	0	0	0	1	0	0	0	0	0	0	0	0	0	1	0	1	699	0	38	106	1	1	7	6.5496506690979	49	662
435	759	1	1	14	24	12	12	369567	1	0	0	0	1	0	0	0	0	0	0	0	0	0	1	0	1	1923	0	31	NA	1	1	4	7.56164169311523	16	662
436	762	1	1	18	32	NA	10	367470	1	0	0	0	1	0	0	0	0	0	0	0	0	0	1	0	1	1216	0	49	127	6	1	8	7.10332202911377	64	662
437	763	1	1	16	29	12	12	496635	1	0	0	0	1	0	0	0	0	0	0	0	0	0	1	0	1	615	0	35	113	1	1	7	6.42162227630615	49	662
438	764	1	1	14	25	12	12	369567	1	0	0	0	1	0	0	0	0	0	0	0	0	0	1	0	1	745	0	36	115	6	1	5	6.61338424682617	25	662
439	765	1	1	16	24	18	14	410630	1	0	0	0	1	0	0	0	0	0	0	0	0	0	1	0	1	458	0	37	NA	6	1	2	6.12686920166016	4	662
440	767	1	1	18	25	16	10	369567	1	0	0	0	1	0	0	0	0	0	0	0	0	0	1	0	1	647	0	45	118	6	1	1	6.47234630584717	1	662
441	768	1	1	12	25	8	12	369567	1	0	0	0	1	0	0	0	0	0	0	0	0	0	1	0	1	745	0	37	106	1	1	7	6.61338424682617	49	662
442	770	1	1	16	25	17	12	369567	1	0	0	0	1	0	0	0	0	0	0	0	0	0	1	1	1	815	0	40	118	1	1	3	6.70318794250488	9	662
443	772	1	1	16	31	13	10	496635	1	0	0	0	1	0	0	0	0	0	0	0	0	0	1	0	1	865	0	46	126	1	1	9	6.76272964477539	81	662
444	773	1	1	12	28	7	8	367772	1	0	0	0	1	0	0	0	0	0	0	0	0	0	1	0	1	542	0	40	95	1	1	10	6.29526615142822	100	662
445	774	1	1	13	27	18	12	367772	1	0	0	0	1	0	0	0	0	0	0	0	0	0	1	0	1	365	0	35	107	1	1	8	5.89989757537842	64	662
446	775	1	1	10	24	18	12	357519	1	0	0	0	1	0	0	0	0	0	0	0	0	0	1	0	1	417	0	32	100	1	1	8	6.03308629989624	64	662
447	776	1	1	16	27	NA	12	735544	0	1	0	0	1	0	0	0	0	0	0	0	0	0	1	0	1	657	0	40	102	6	1	5	6.48768424987793	25	662
448	777	1	1	15	26	NA	12	735544	0	1	0	0	1	0	0	0	0	0	0	0	0	0	1	0	1	529	0	43	113	6	1	5	6.27098846435547	25	662
449	778	1	1	17	29	8	12	960890	1	0	0	0	1	0	0	0	0	0	0	0	0	0	1	0	1	851	0	46	96	1	1	6	6.74641227722168	36	662
450	779	1	1	12	25	12	9	715038	1	0	0	0	1	0	0	0	0	0	0	0	0	0	1	0	1	663	0	32	106	1	1	7	6.49677515029907	49	662
451	781	1	1	16	24	12	12	715038	1	0	0	0	1	0	0	0	0	0	0	0	0	0	1	0	1	529	1	33	NA	1	1	2	6.27098846435547	4	662
452	784	1	1	18	28	9	12	380166	1	0	0	0	1	0	0	0	0	0	0	0	0	0	1	0	1	889	0	47	111	1	0	4	6.7900972366333	16	662
453	785	1	1	17	28	NA	12	380166	1	0	0	0	1	0	0	0	0	0	0	0	0	0	1	1	1	865	1	43	113	1	1	5	6.76272964477539	25	662
454	786	1	1	18	26	18	12	380166	1	0	0	0	1	0	0	0	0	0	0	0	0	0	1	1	1	231	0	46	138	1	1	2	5.44241762161255	4	662
455	791	1	1	12	32	10	9	367470	1	0	0	0	1	0	0	0	0	0	0	0	0	0	0	1	1	802	0	NA	110	1	1	14	6.68710851669312	196	662
456	792	1	1	13	27	12	12	380166	1	0	0	0	0	0	0	0	0	0	0	1	0	0	1	0	1	533	1	50	105	1	1	8	6.27852153778076	64	669
457	798	1	1	15	25	12	14	102031	1	0	0	0	1	0	0	0	0	0	0	0	0	1	1	0	1	775	0	29	85	1	1	4	6.65286302566528	16	662
458	799	1	1	14	24	12	14	102031	1	0	0	0	1	0	0	0	0	0	0	0	0	1	1	0	1	476	1	26	NA	6	1	4	6.16541767120361	16	662
459	800	1	1	16	33	16	NA	367470	1	0	0	0	1	0	0	0	0	0	0	0	0	0	1	0	1	865	0	46	113	1	1	11	6.76272964477539	121	662
460	801	1	1	16	28	10	12	422407	1	0	0	0	1	0	0	0	0	0	0	0	0	0	0	0	0	1014	0	51	117	1	1	6	6.92165803909302	36	662
461	802	1	1	18	32	16	16	367470	1	0	0	0	1	0	0	0	0	0	0	0	0	0	1	0	1	641	0	56	126	1	1	8	6.46302938461304	64	662
462	803	1	1	16	24	10	10	369567	1	0	0	0	1	0	0	0	0	0	0	0	0	0	1	0	1	333	0	34	125	1	1	2	5.80814266204834	4	662
463	804	1	1	11	34	8	9	149854	1	0	0	0	1	0	0	0	0	0	0	0	0	1	1	0	1	556	0	18	NA	1	NA	17	6.32076835632324	289	662
464	805	1	1	18	26	8	12	380166	1	0	0	0	1	0	0	0	0	0	0	0	0	0	1	0	1	528	0	37	125	5	1	2	6.26909637451172	4	662
465	807	1	1	12	26	12	12	380166	1	0	0	0	1	0	0	0	0	0	0	0	0	0	1	0	1	635	1	32	NA	1	1	8	6.45362520217896	64	662
466	809	1	1	11	27	3	NA	123613	0	0	0	0	1	0	0	0	0	0	0	0	0	1	1	1	1	500	0	37	NA	1	0	10	6.21460819244385	100	662
467	810	1	1	16	34	NA	12	149854	1	0	0	0	1	0	0	0	0	0	0	0	0	1	1	0	1	1154	1	49	89	1	1	12	7.05098962783813	144	662
468	813	1	1	18	26	NA	NA	380166	1	0	0	0	1	0	0	0	0	0	0	0	0	0	1	0	1	855	0	40	NA	1	1	2	6.75110149383545	4	662
469	814	1	1	12	28	16	12	422407	1	0	0	0	1	0	0	0	0	0	0	0	0	0	0	0	1	479	0	38	NA	1	1	10	6.1717004776001	100	662
470	815	1	1	18	25	12	11	369567	1	0	0	0	1	0	0	0	0	0	0	0	0	0	1	1	1	817	0	31	125	1	1	1	6.70563888549805	1	662
471	816	1	1	18	29	18	12	496635	1	0	0	0	1	0	0	0	0	0	0	0	0	0	1	0	0	692	0	47	129	1	1	5	6.53958606719971	25	662
472	817	1	1	16	33	12	8	408301	1	0	0	0	1	0	0	0	0	0	0	0	0	0	0	0	1	989	0	47	118	1	1	11	6.89669418334961	121	662
473	818	1	1	16	31	NA	12	551817	1	0	0	0	1	0	0	0	0	0	0	0	0	0	1	1	1	447	1	34	114	1	1	9	6.10255861282349	81	662
474	819	1	1	18	34	16	12	408301	1	0	0	0	1	0	0	0	0	0	0	0	0	0	1	0	1	1002	0	40	121	1	1	10	6.90975332260132	100	662
475	820	1	1	18	34	12	12	408301	1	0	0	0	1	0	0	0	0	0	0	0	0	0	1	0	1	1241	0	51	115	5	1	10	7.12367296218872	100	662
476	821	1	1	14	32	NA	12	408301	0	0	1	0	1	0	0	0	0	0	0	0	0	0	0	0	1	921	0	44	120	1	1	12	6.8254599571228	144	662
477	822	1	1	12	28	7	8	92929	1	0	0	0	1	0	0	0	0	0	0	0	0	0	1	0	1	571	0	37	85	6	NA	10	6.34738922119141	100	662
478	824	1	1	12	31	6	11	121400	1	0	0	0	1	0	0	0	0	0	0	0	0	0	1	0	1	525	0	43	109	1	1	13	6.26339817047119	169	662
479	827	1	1	12	28	8	12	380166	1	0	0	0	1	0	0	0	0	0	0	0	0	0	1	0	1	1154	0	42	117	1	1	10	7.05098962783813	100	662
480	832	1	1	12	24	5	10	102031	1	0	0	0	1	0	0	0	0	0	0	0	0	1	1	0	1	480	0	31	NA	1	0	6	6.17378616333008	36	662
481	836	1	1	11	24	NA	10	369567	0	1	0	0	1	0	0	0	0	0	0	0	0	0	1	0	1	839	0	29	NA	1	1	7	6.73221063613892	49	662
482	838	1	1	14	33	10	10	408301	1	0	0	0	1	0	0	0	0	0	0	0	0	0	1	0	1	1402	0	42	NA	1	1	13	7.24565505981445	169	662
483	840	1	1	13	27	NA	NA	427892	1	0	0	0	1	0	0	0	0	0	0	0	0	1	1	0	1	400	0	21	NA	6	1	8	5.99146461486816	64	662
484	841	1	1	12	33	12	8	367470	1	0	0	0	1	0	0	0	0	0	0	0	0	0	1	0	1	710	0	43	NA	6	1	15	6.56526517868042	225	662
485	845	1	1	14	24	10	12	369567	1	0	0	0	1	0	0	0	0	0	0	0	0	0	1	0	1	635	0	29	104	1	1	4	6.45362520217896	16	662
486	846	1	1	13	26	11	12	380166	1	0	0	0	1	0	0	0	0	0	0	0	0	0	1	0	1	388	0	28	109	6	1	7	5.96100521087646	49	662
487	847	1	1	12	26	8	10	380166	1	0	0	0	1	0	0	0	0	0	0	0	0	0	1	0	1	688	0	28	105	1	1	8	6.53378868103027	64	662
488	850	1	1	12	34	NA	NA	367470	1	0	0	0	1	0	0	0	0	0	0	0	0	0	1	0	1	630	0	36	85	1	1	16	6.44571971893311	256	662
489	851	0	1	15	34	12	8	367470	1	0	0	0	1	0	0	0	0	0	0	0	0	0	1	0	1	1044	0	38	115	6	1	13	6.95081472396851	169	662
490	857	0	1	12	24	NA	12	369567	0	1	0	0	1	0	0	0	0	0	0	0	0	0	1	0	1	577	0	41	NA	1	1	6	6.35784244537354	36	662
491	862	0	1	12	25	NA	12	369567	0	1	0	0	1	0	0	0	0	0	0	0	0	0	1	0	1	500	0	38	89	6	1	7	6.21460819244385	49	662
492	863	1	1	12	34	NA	12	367470	0	1	0	0	0	1	0	0	0	0	0	0	0	0	0	0	0	781	0	50	85	1	0	16	6.6605749130249	256	663
493	864	1	1	13	26	12	11	380166	1	0	0	0	1	0	0	0	0	0	0	0	0	0	1	0	1	577	0	34	102	1	1	7	6.35784244537354	49	662
494	865	1	1	13	25	12	11	369567	1	0	0	0	1	0	0	0	0	0	0	0	0	0	1	0	1	525	1	39	109	5	1	6	6.26339817047119	36	662
495	867	1	1	17	28	12	12	380166	1	0	0	0	1	0	0	0	0	0	0	0	0	0	1	0	1	385	1	39	107	1	1	5	5.95324325561523	25	662
496	870	0	1	12	29	8	NA	496635	1	0	0	0	1	0	0	0	0	0	0	0	0	0	1	0	1	625	0	35	NA	1	NA	11	6.43775177001953	121	662
497	871	0	1	16	28	11	11	380166	1	0	0	0	1	0	0	0	0	0	0	0	0	0	1	0	1	625	1	32	103	1	1	6	6.43775177001953	36	662
498	872	0	1	13	26	10	12	380166	1	0	0	0	1	0	0	0	0	0	0	0	0	0	1	0	1	475	1	34	83	1	1	7	6.16331481933594	49	662
499	875	0	1	14	25	12	12	357519	1	0	0	0	1	0	0	0	0	0	0	0	0	0	1	0	1	659	1	32	112	1	1	5	6.49072360992432	25	662
500	876	0	1	16	24	12	12	357519	1	0	0	0	1	0	0	0	0	0	0	0	0	0	1	0	1	425	0	30	NA	6	1	2	6.05208921432495	4	662
501	878	0	1	14	25	10	11	410630	1	0	0	0	1	0	0	0	0	0	0	0	0	0	1	0	1	524	0	32	106	1	1	5	6.2614917755127	25	662
502	879	0	0	12	26	10	10	422310	1	0	0	0	1	0	0	0	0	0	0	0	0	0	1	0	1	625	0	30	101	1	0	8	6.43775177001953	64	662
503	880	0	0	16	31	9	12	551690	1	0	0	0	1	0	0	0	0	0	0	0	0	0	1	0	1	1010	0	47	105	1	1	9	6.91770553588867	81	662
504	881	0	0	12	26	9	12	422310	1	0	0	0	1	0	0	0	0	0	0	0	0	0	1	0	1	601	0	40	116	1	1	8	6.39859485626221	64	662
505	882	0	0	12	27	NA	11	422310	0	0	1	0	1	0	0	0	0	0	0	0	0	0	1	0	1	808	0	22	NA	1	0	9	6.69456195831299	81	662
506	883	0	0	12	28	7	7	422310	1	0	0	0	1	0	0	0	0	0	0	0	0	0	1	0	1	426	0	22	90	1	1	10	6.05443954467773	100	662
507	885	0	0	12	30	5	11	551690	1	0	0	0	1	0	0	0	0	0	0	0	0	0	1	0	1	1060	0	28	91	1	1	12	6.96602439880371	144	662
508	886	0	0	12	26	5	11	422310	1	0	0	0	1	0	0	0	0	0	0	0	0	0	1	0	1	414	0	41	128	1	1	8	6.02586603164673	64	662
509	887	0	0	12	30	NA	7	551690	0	1	0	0	1	0	0	0	0	0	0	0	0	0	1	0	1	492	0	34	110	1	1	12	6.19847869873047	144	662
510	888	0	0	12	27	NA	7	422310	0	1	0	0	1	0	0	0	0	0	0	0	0	0	1	0	1	325	0	28	93	1	1	9	5.78382539749146	81	662
511	889	0	0	12	28	12	7	422310	1	0	0	0	1	0	0	0	0	0	0	0	0	0	1	0	1	275	0	33	75	4	1	10	5.61677122116089	100	662
512	891	0	0	12	25	8	12	410536	1	0	0	0	1	0	0	0	0	0	0	0	0	0	1	0	1	291	0	17	94	6	1	7	5.67332315444946	49	662
513	892	0	0	18	31	16	NA	551690	0	0	0	0	1	0	0	0	0	0	0	0	0	0	1	1	1	731	0	39	NA	1	1	7	6.59441328048706	49	662
514	893	0	0	14	26	12	12	327808	1	0	0	0	1	0	0	0	0	0	0	0	0	0	1	1	1	488	0	38	112	1	1	6	6.19031524658203	36	662
515	894	0	0	14	24	12	12	318670	1	0	0	0	1	0	0	0	0	0	0	0	0	0	1	0	1	337	0	32	121	6	1	4	5.8200831413269	16	662
516	895	0	0	12	27	12	12	422310	1	0	0	0	1	0	0	0	0	0	0	0	0	0	1	0	1	725	0	33	100	1	1	9	6.58617162704468	81	662
517	897	0	0	13	25	12	12	318670	1	0	0	0	1	0	0	0	0	0	0	0	0	0	0	0	1	440	0	27	109	1	1	6	6.0867748260498	36	662
518	899	0	0	16	27	8	8	327808	1	0	0	0	1	0	0	0	0	0	0	0	0	0	0	0	1	641	0	38	122	1	0	5	6.46302938461304	25	662
519	900	0	0	12	28	8	11	422310	1	0	0	0	1	0	0	0	0	0	0	0	0	0	1	0	1	375	0	26	102	6	0	10	5.92692613601685	100	662
520	901	0	0	12	25	NA	NA	456151	0	0	0	0	1	0	0	0	0	0	0	0	0	0	1	0	1	481	0	34	131	1	1	7	6.17586708068848	49	662
521	902	0	0	14	29	10	8	551690	1	0	0	0	1	0	0	0	0	0	0	0	0	0	1	0	1	925	0	38	122	1	0	9	6.82979393005371	81	662
522	904	0	0	12	26	12	12	422310	1	0	0	0	1	0	0	0	0	0	0	0	0	0	1	0	1	514	0	NA	NA	4	1	8	6.24222326278687	64	662
523	905	0	0	12	33	10	10	453563	1	0	0	0	1	0	0	0	0	0	0	0	0	0	1	0	1	1065	0	38	105	1	0	15	6.97073030471802	225	662
524	908	0	0	12	28	NA	10	327808	1	0	0	0	1	0	0	0	0	0	0	0	0	0	1	0	1	638	0	36	103	1	1	10	6.45833826065063	100	662
525	909	0	0	12	32	9	9	316862	0	1	0	0	1	0	0	0	0	0	0	0	0	0	1	0	1	739	0	37	113	1	1	14	6.60529804229736	196	662
526	910	0	0	12	26	12	8	327808	0	0	1	0	1	0	0	0	0	0	0	0	0	0	1	0	1	493	0	34	104	1	0	8	6.2005090713501	64	662
527	911	0	0	10	24	12	9	318670	0	0	1	0	1	0	0	0	0	0	0	0	0	0	1	1	1	650	0	26	NA	1	0	8	6.47697257995605	64	662
528	912	0	0	7	31	5	8	428238	1	0	0	0	1	0	0	0	0	0	0	0	0	0	1	0	1	308	0	33	NA	4	0	18	5.73009967803955	324	662
529	913	0	0	16	30	11	9	551690	1	0	0	0	1	0	0	0	0	0	0	0	0	0	1	0	0	629	0	43	124	1	1	8	6.44413137435913	64	662
530	914	0	0	13	28	8	12	422310	1	0	0	0	1	0	0	0	0	0	0	0	0	0	0	0	0	409	0	31	110	1	1	9	6.0137152671814	81	662
531	915	0	0	18	33	NA	NA	408207	1	0	0	0	1	0	0	0	0	0	0	0	0	0	1	0	0	600	0	39	112	6	1	9	6.39692974090576	81	662
532	916	0	0	12	28	11	12	422310	1	0	0	0	1	0	0	0	0	0	0	0	0	0	0	0	1	745	0	34	104	1	1	10	6.61338424682617	100	662
533	917	0	0	17	31	NA	NA	551690	1	0	0	0	1	0	0	0	0	0	0	0	0	0	1	0	0	625	1	37	96	1	1	8	6.43775177001953	64	662
534	919	0	0	12	29	12	12	475820	1	0	0	1	0	0	0	0	0	0	0	0	0	0	0	0	1	549	0	37	95	1	1	11	6.30809831619263	121	661
535	920	0	0	15	24	12	12	354077	1	0	0	0	1	0	0	0	0	0	0	0	0	0	0	0	0	326	1	32	95	6	1	3	5.7868971824646	9	662
536	921	0	0	9	26	7	NA	327808	0	0	0	0	1	0	0	0	0	0	0	0	0	0	0	0	0	258	0	20	NA	1	1	11	5.55295944213867	121	662
537	924	0	1	12	26	12	12	380166	1	0	0	0	1	0	0	0	0	0	0	0	0	0	1	0	0	875	0	40	103	1	1	8	6.77422380447388	64	662
538	925	0	1	12	25	12	12	369567	1	0	0	0	1	0	0	0	0	0	0	0	0	0	0	0	0	639	0	48	116	1	1	7	6.45990467071533	49	662
539	927	0	1	11	33	7	7	316862	1	0	0	0	1	0	0	0	0	0	0	0	0	0	0	0	0	667	0	37	NA	1	1	16	6.50278997421265	256	662
540	928	0	1	14	29	12	12	428238	1	0	0	0	1	0	0	0	0	0	0	0	0	0	1	1	0	504	0	45	95	1	1	9	6.22257614135742	81	662
541	929	0	1	17	25	12	12	318670	1	0	0	0	1	0	0	0	0	0	0	0	0	0	1	1	0	313	1	38	101	6	1	2	5.74620342254639	4	662
542	931	0	1	18	27	NA	12	422310	1	0	0	0	1	0	0	0	0	0	0	0	0	0	1	1	0	1010	0	44	NA	1	1	3	6.91770553588867	9	662
543	932	0	1	10	33	8	9	408207	1	0	0	0	1	0	0	0	0	0	0	0	0	0	0	0	0	1000	0	34	NA	1	1	17	6.90775537490845	289	662
544	933	0	1	16	28	NA	18	422310	0	1	0	0	1	0	0	0	0	0	0	0	0	0	0	0	0	721	0	39	120	1	1	6	6.58063936233521	36	662
545	935	0	1	12	27	8	8	422310	1	0	0	0	1	0	0	0	0	0	0	0	0	0	0	0	0	785	0	39	102	1	0	9	6.66568374633789	81	662
546	936	0	1	12	34	8	12	77455	1	0	0	0	1	0	0	0	0	0	0	0	0	0	0	0	0	546	0	39	105	1	1	16	6.30261898040771	256	662
547	938	0	1	12	25	8	8	77897	1	0	0	0	1	0	0	0	0	0	0	0	0	0	0	0	0	828	0	28	103	4	1	7	6.71901321411133	49	662
548	939	0	1	12	25	10	10	77897	1	0	0	0	1	0	0	0	0	0	0	0	0	0	0	0	0	159	0	30	94	1	1	7	5.06890439987183	49	662
549	940	0	1	10	27	10	6	94700	1	0	0	0	1	0	0	0	0	0	0	0	0	0	0	0	0	700	0	22	NA	1	0	11	6.55108022689819	121	662
550	941	0	1	13	28	10	12	327808	1	0	0	0	1	0	0	0	0	0	0	0	0	0	0	0	0	721	0	36	102	1	0	9	6.58063936233521	81	662
551	942	0	1	12	24	10	12	318670	1	0	0	0	1	0	0	0	0	0	0	0	0	0	0	0	0	304	0	14	NA	1	1	6	5.71702766418457	36	662
552	944	0	1	16	25	12	16	318670	1	0	0	0	1	0	0	0	0	0	0	0	0	0	1	0	0	553	0	31	112	6	1	3	6.31535816192627	9	662
553	945	0	1	14	26	7	6	327808	1	0	0	0	1	0	0	0	0	0	0	0	0	0	1	1	0	542	0	35	101	1	1	6	6.29526615142822	36	662
554	947	0	1	16	24	12	12	318670	1	0	0	0	1	0	0	0	0	0	0	0	0	0	0	0	0	509	0	30	121	1	1	2	6.2324481010437	4	662
555	948	0	1	16	24	12	12	312925	1	0	0	0	1	0	0	0	0	0	0	0	0	0	0	0	0	385	0	40	105	1	1	2	5.95324325561523	4	662
556	949	1	0	12	32	10	8	367470	1	0	0	0	1	0	0	0	0	0	0	0	0	0	1	0	1	1442	0	42	96	1	1	14	7.2737865447998	196	662
557	951	1	0	16	32	14	14	408301	0	0	1	0	1	0	0	0	0	0	0	0	0	0	1	0	1	879	0	45	128	1	1	10	6.77878475189209	100	662
558	953	1	0	13	24	16	14	369567	1	0	0	0	1	0	0	0	0	0	0	0	0	0	1	0	1	1000	0	37	NA	6	1	5	6.90775537490845	25	662
559	954	1	0	12	28	12	9	380166	1	0	0	0	1	0	0	0	0	0	0	0	0	0	0	0	0	863	0	26	110	1	0	10	6.76041460037231	100	662
560	956	1	0	12	27	11	12	367772	1	0	0	0	1	0	0	0	0	0	0	0	0	0	0	0	0	740	0	32	92	1	1	9	6.60665035247803	81	662
561	957	1	0	12	34	NA	NA	355491	1	0	0	0	1	0	0	0	0	0	0	0	0	0	0	0	0	889	0	39	87	1	1	16	6.7900972366333	256	662
562	958	1	0	15	29	9	10	480445	1	0	0	0	1	0	0	0	0	0	0	0	0	0	1	0	1	458	1	34	126	1	1	8	6.12686920166016	64	662
563	961	0	1	12	34	NA	9	367470	1	0	0	1	0	0	0	0	0	0	0	0	0	0	1	0	1	450	0	34	98	1	1	16	6.10924768447876	256	661
564	963	0	1	12	34	NA	NA	408301	1	0	0	1	0	0	0	0	0	0	0	0	0	0	1	0	1	700	0	39	103	1	1	16	6.55108022689819	256	661
565	965	0	1	14	33	8	12	367470	1	0	0	1	0	0	0	0	0	0	0	0	0	0	1	0	1	744	0	49	122	1	1	13	6.61204099655151	169	661
566	967	0	1	16	32	12	11	408207	1	0	0	0	1	0	0	0	0	0	0	0	0	0	1	0	0	889	0	43	109	1	1	10	6.7900972366333	100	662
567	969	0	1	18	32	12	12	408207	1	0	0	0	1	0	0	0	0	0	0	0	0	0	1	0	0	692	0	37	125	1	1	8	6.53958606719971	64	662
568	971	0	1	18	33	12	12	316862	1	0	0	0	1	0	0	0	0	0	0	0	0	0	0	0	0	604	0	38	119	1	0	9	6.40357398986816	81	662
569	972	0	1	18	30	NA	14	551690	0	1	0	0	1	0	0	0	0	0	0	0	0	0	1	0	1	625	0	42	97	1	1	6	6.43775177001953	36	662
570	973	0	1	14	33	8	12	408207	1	0	0	0	1	0	0	0	0	0	0	0	0	0	1	0	1	746	0	36	103	1	1	13	6.6147255897522	169	662
571	974	0	1	18	33	8	16	408207	1	0	0	0	1	0	0	0	0	0	0	0	0	0	1	0	1	726	0	42	95	1	1	9	6.58755016326904	81	662
572	975	0	1	12	30	8	10	612989	1	0	0	0	1	0	0	0	0	0	0	0	0	0	1	0	1	560	0	40	99	1	1	12	6.32793664932251	144	662
573	976	0	1	12	26	12	10	422310	1	0	0	0	1	0	0	0	0	0	0	0	0	0	0	0	0	424	0	31	106	1	1	8	6.04973363876343	64	662
574	977	0	1	12	26	NA	12	422310	0	1	0	0	1	0	0	0	0	0	0	0	0	0	0	0	0	400	0	33	117	1	1	8	5.99146461486816	64	662
575	978	0	1	14	26	12	12	422310	1	0	0	0	1	0	0	0	0	0	0	0	0	0	1	0	0	250	0	40	112	5	1	6	5.52146100997925	36	662
576	979	0	1	13	26	8	12	422310	1	0	0	0	1	0	0	0	0	0	0	0	0	0	1	0	1	646	0	30	136	1	1	7	6.47079944610596	49	662
577	980	0	1	12	24	12	12	318670	1	0	0	0	1	0	0	0	0	0	0	0	0	0	1	0	1	598	0	35	NA	1	1	6	6.39359092712402	36	662
578	981	0	1	12	27	8	8	327808	1	0	0	0	1	0	0	0	0	0	0	0	0	0	1	0	1	1000	0	33	110	5	1	9	6.90775537490845	81	662
579	983	1	1	12	28	12	13	422310	1	0	0	0	1	0	0	0	0	0	0	0	0	0	0	0	0	528	0	26	111	1	1	10	6.26909637451172	100	662
580	984	1	1	12	26	12	13	422310	1	0	0	0	1	0	0	0	0	0	0	0	0	0	0	0	0	481	0	32	115	4	1	8	6.17586708068848	64	662
581	985	1	1	12	33	6	12	408207	1	0	0	0	1	0	0	0	0	0	0	0	0	0	0	0	0	850	0	47	90	1	1	15	6.74523639678955	225	662
582	986	1	1	14	30	NA	NA	428238	1	0	0	0	1	0	0	0	0	0	0	0	0	0	0	0	1	506	0	45	98	1	1	10	6.22653675079346	100	662
583	987	1	1	12	29	8	8	428238	1	0	0	0	1	0	0	0	0	0	0	0	0	0	1	0	1	512	0	41	106	1	0	11	6.2383246421814	121	662
584	988	1	1	11	26	NA	9	364232	0	0	0	0	1	0	0	0	0	0	0	0	0	0	1	0	1	220	0	20	NA	6	0	9	5.39362764358521	81	662
585	989	1	1	16	24	NA	NA	118599	0	0	0	0	1	0	0	0	0	0	0	0	0	0	1	0	1	154	1	38	NA	6	1	2	5.03695249557495	4	662
586	990	1	1	12	31	11	12	134858	1	0	0	0	1	0	0	0	0	0	0	0	0	0	1	0	1	240	0	44	95	1	1	13	5.48063898086548	169	662
587	991	1	1	12	28	11	12	103231	1	0	0	0	1	0	0	0	0	0	0	0	0	0	1	0	1	557	0	43	115	1	1	10	6.32256507873535	100	662
588	996	1	1	15	27	12	12	327808	0	0	1	0	1	0	0	0	0	0	0	0	0	0	1	0	1	500	0	40	106	6	0	6	6.21460819244385	36	662
589	997	1	1	16	26	NA	NA	327808	1	0	0	0	1	0	0	0	0	0	0	0	0	0	1	0	1	372	0	34	102	1	1	4	5.91889381408691	16	662
590	998	1	1	10	25	8	8	312925	1	0	0	0	1	0	0	0	0	0	0	0	0	0	0	0	0	350	0	26	91	5	0	9	5.85793304443359	81	662
591	999	1	1	12	26	8	8	327808	1	0	0	0	1	0	0	0	0	0	0	0	0	0	0	0	0	584	0	26	114	1	0	8	6.36990118026733	64	662
592	1004	1	1	13	26	10	12	327808	1	0	0	0	1	0	0	0	0	0	0	0	0	0	0	0	0	515	0	34	92	5	1	7	6.2441668510437	49	662
593	1006	0	0	12	29	NA	NA	428238	1	0	0	1	0	0	0	0	0	0	0	0	0	0	0	0	0	390	0	43	111	5	1	11	5.96614694595337	121	661
594	1008	0	0	16	25	12	12	318670	1	0	0	1	0	0	0	0	0	0	0	0	0	0	0	0	0	280	0	34	111	4	1	3	5.63478946685791	9	661
595	1009	0	0	12	33	NA	12	316862	1	0	0	1	0	0	0	0	0	0	0	0	0	0	0	0	0	690	0	38	NA	1	1	15	6.53669166564941	225	661
596	1010	0	0	12	26	NA	12	327808	1	0	0	1	0	0	0	0	0	0	0	0	0	0	0	0	0	300	0	30	96	1	1	8	5.70378255844116	64	661
597	1011	0	0	17	27	12	13	327808	1	0	0	1	0	0	0	0	0	0	0	0	0	0	0	0	0	635	0	36	119	1	1	4	6.45362520217896	16	661
598	1012	0	0	13	26	12	13	327808	1	0	0	1	0	0	0	0	0	0	0	0	0	0	0	0	0	342	0	32	85	1	1	7	5.83481073379517	49	661
599	1013	0	0	16	26	12	12	327808	1	0	0	1	0	0	0	0	0	0	0	0	0	0	0	0	0	505	0	34	98	1	1	4	6.22455835342407	16	661
600	1014	0	0	13	24	12	12	318670	1	0	0	1	0	0	0	0	0	0	0	0	0	0	0	0	0	356	0	30	114	1	1	5	5.87493085861206	25	661
601	1015	0	0	12	33	NA	NA	352069	0	0	0	1	0	0	0	0	0	0	0	0	0	0	0	0	0	262	0	39	79	1	1	15	5.5683445930481	225	661
602	1017	0	0	10	32	NA	NA	316862	0	0	0	1	0	0	0	0	0	0	0	0	0	0	0	0	0	400	0	30	NA	1	1	16	5.99146461486816	256	661
603	1020	0	0	13	29	16	16	475820	1	0	0	1	0	0	0	0	0	0	0	0	0	0	0	0	0	740	0	42	108	1	1	10	6.60665035247803	100	661
604	1021	0	0	12	34	8	12	316862	0	0	1	1	0	0	0	0	0	0	0	0	0	0	0	0	0	342	0	NA	NA	1	1	16	5.83481073379517	256	661
605	1023	0	0	15	29	8	12	428238	1	0	0	1	0	0	0	0	0	0	0	0	0	0	0	0	0	276	0	39	121	6	1	8	5.62040090560913	64	661
606	1024	0	0	9	24	10	12	318670	1	0	0	1	0	0	0	0	0	0	0	0	0	0	0	0	0	427	1	36	NA	6	1	9	6.05678415298462	81	661
607	1026	0	0	12	25	12	NA	312925	0	0	0	1	0	0	0	0	0	0	0	0	0	0	0	0	0	239	0	40	117	1	0	7	5.47646331787109	49	661
608	1027	0	0	13	24	12	NA	312925	0	0	0	1	0	0	0	0	0	0	0	0	0	0	0	0	0	385	0	21	NA	1	0	5	5.95324325561523	25	661
609	1028	0	0	12	29	4	8	475820	1	0	0	1	0	0	0	0	0	0	0	0	0	0	0	0	0	350	0	32	107	1	0	11	5.85793304443359	121	661
610	1030	0	0	12	29	NA	NA	551690	0	0	0	1	0	0	0	0	0	0	0	0	0	0	0	0	0	599	1	40	103	1	1	11	6.39526176452637	121	661
611	1031	0	0	15	31	10	12	612989	1	0	0	1	0	0	0	0	0	0	0	0	0	0	1	0	0	750	0	45	105	1	1	10	6.62007331848145	100	661
612	1033	0	0	16	33	12	9	316862	1	0	0	1	0	0	0	0	0	0	0	0	0	0	0	0	0	692	0	41	105	1	1	11	6.53958606719971	121	661
613	1034	0	0	12	34	12	14	316862	1	0	0	1	0	0	0	0	0	0	0	0	0	0	0	0	0	147	0	43	88	1	1	16	4.99043273925781	256	661
614	1036	1	1	12	26	12	10	364232	1	0	0	0	1	0	0	0	0	0	0	0	0	0	1	0	0	280	0	34	96	1	1	8	5.63478946685791	64	662
615	1037	1	1	18	32	NA	7	316862	1	0	0	0	1	0	0	0	0	0	0	0	0	0	1	0	0	769	0	46	105	1	1	8	6.64509105682373	64	662
616	1038	1	1	13	32	7	12	316862	1	0	0	0	1	0	0	0	0	0	0	0	0	0	1	0	0	1010	0	41	NA	4	0	13	6.91770553588867	169	662
617	1040	1	1	14	26	16	14	327808	1	0	0	0	1	0	0	0	0	0	0	0	0	0	0	0	0	517	0	34	100	1	1	6	6.24804306030273	36	662
618	1041	1	1	16	26	16	14	327808	1	0	0	0	1	0	0	0	0	0	0	0	0	0	0	0	0	400	0	43	116	6	1	4	5.99146461486816	16	662
619	1046	1	1	12	25	12	10	318670	1	0	0	0	1	0	0	0	0	0	0	0	0	0	0	0	0	375	0	22	86	1	1	7	5.92692613601685	49	662
620	1047	0	1	12	31	12	10	551690	1	0	0	1	0	0	0	0	0	0	0	0	0	0	0	0	0	596	0	27	88	1	1	13	6.39024066925049	169	661
621	1049	0	1	7	31	NA	NA	475820	1	0	0	1	0	0	0	0	0	0	0	0	0	0	0	0	0	350	0	34	NA	1	0	18	5.85793304443359	324	661
622	1050	0	1	11	33	NA	NA	316862	0	0	0	1	0	0	0	0	0	0	0	0	0	0	0	0	0	417	0	34	97	1	1	16	6.03308629989624	256	661
623	1051	0	1	16	29	NA	12	428238	0	1	0	1	0	0	0	0	0	0	0	0	0	0	0	0	0	338	0	43	112	5	1	7	5.82304573059082	49	661
624	1052	0	1	18	26	18	14	327808	1	0	0	1	0	0	0	0	0	0	0	0	0	0	0	0	0	481	0	35	125	6	1	2	6.17586708068848	4	661
625	1053	0	1	12	28	11	11	327808	1	0	0	1	0	0	0	0	0	0	0	0	0	0	0	0	0	500	0	12	NA	1	1	10	6.21460819244385	100	661
626	1054	0	1	12	27	NA	NA	327808	0	0	0	1	0	0	0	0	0	0	0	0	0	0	0	0	0	305	0	37	NA	4	1	9	5.72031164169312	81	661
627	1056	0	1	10	34	9	NA	316862	1	0	0	1	0	0	0	0	0	0	0	0	0	0	0	0	0	450	0	31	84	1	1	18	6.10924768447876	324	661
628	1058	1	1	16	29	14	12	484311	1	0	0	0	0	1	0	0	0	0	0	0	0	0	1	0	1	769	0	45	117	1	1	7	6.64509105682373	49	663
629	1059	1	1	16	26	14	12	370732	1	0	0	0	0	1	0	0	0	0	0	0	0	0	1	0	1	721	0	42	110	6	1	4	6.58063936233521	16	663
630	1060	1	1	13	29	NA	9	484311	1	0	0	0	0	1	0	0	0	0	0	0	0	0	1	0	1	1000	0	32	104	1	1	10	6.90775537490845	100	663
631	1062	1	1	14	30	12	12	484311	1	0	0	0	0	1	0	0	0	0	0	0	0	0	1	0	1	625	0	35	101	1	1	10	6.43775177001953	100	663
632	1063	1	1	16	26	12	11	370732	1	0	0	0	0	1	0	0	0	0	0	0	0	0	1	0	1	817	0	33	99	1	1	4	6.70563888549805	16	663
633	1064	1	1	12	34	8	NA	358351	0	0	0	0	0	1	0	0	0	0	0	0	0	0	1	0	1	377	0	35	87	1	1	16	5.9322452545166	256	663
634	1067	1	1	12	33	NA	NA	358351	1	0	0	0	0	1	0	0	0	0	0	0	0	0	1	0	1	708	0	43	101	1	0	15	6.56244421005249	225	663
635	1068	1	1	14	24	12	12	360396	1	0	0	0	0	1	0	0	0	0	0	0	0	0	1	0	1	411	0	31	117	1	1	4	6.01859331130981	16	663
636	1070	1	1	13	32	NA	NA	358351	0	0	0	0	0	1	0	0	0	0	0	0	0	0	1	0	1	1339	0	41	108	1	1	13	7.19967842102051	169	663
637	1071	1	1	12	34	NA	1	358351	0	1	0	0	0	1	0	0	0	0	0	0	0	0	0	0	1	716	0	42	NA	1	0	16	6.57368040084839	256	663
638	1075	1	1	10	32	NA	9	141996	1	0	0	0	0	1	0	0	0	0	0	0	0	1	1	0	1	192	0	37	86	4	1	16	5.25749540328979	256	663
639	1076	1	1	16	32	8	NA	141996	0	0	0	0	0	1	0	0	0	0	0	0	0	1	1	0	1	797	0	43	NA	6	0	10	6.68085479736328	100	663
640	1077	1	1	16	34	10	10	141996	1	0	0	0	0	1	0	0	0	0	0	0	0	1	1	0	1	924	0	33	69	1	1	12	6.82871198654175	144	663
641	1078	1	1	15	26	18	16	99110	1	0	0	0	0	1	0	0	0	0	0	0	0	1	1	0	1	240	1	30	105	6	1	5	5.48063898086548	25	663
642	1079	1	1	13	25	12	12	360396	1	0	0	0	0	1	0	0	0	0	0	0	0	0	1	0	1	625	0	39	104	1	0	6	6.43775177001953	36	663
643	1080	1	1	8	24	7	10	360396	1	0	0	0	0	1	0	0	0	0	0	0	0	0	1	0	1	1025	0	34	NA	1	0	10	6.93244791030884	100	663
644	1081	1	1	12	28	9	11	99110	1	0	0	0	0	1	0	0	0	0	0	0	0	1	0	1	1	503	0	38	109	1	1	10	6.22059011459351	100	663
645	1089	1	1	16	28	8	8	370732	1	0	0	0	0	0	1	0	0	0	0	0	0	0	1	0	0	462	0	39	85	1	1	6	6.13556480407715	36	664
646	1090	1	1	16	25	9	11	360396	1	0	0	0	0	0	1	0	0	0	0	0	0	0	0	0	1	476	0	36	114	1	1	3	6.16541767120361	9	664
647	1091	1	1	15	26	8	13	370732	1	0	0	0	0	0	1	0	0	0	0	0	0	0	1	1	1	500	0	33	99	4	1	5	6.21460819244385	25	664
648	1094	1	1	12	34	NA	NA	358351	1	0	0	0	0	0	1	0	0	0	0	0	0	0	0	0	1	1000	0	42	NA	1	1	16	6.90775537490845	256	664
649	1095	1	1	13	34	NA	NA	358351	1	0	0	0	0	0	1	0	0	0	0	0	0	0	0	0	1	663	0	46	90	1	1	15	6.49677515029907	225	664
650	1097	1	1	15	34	12	12	358351	1	0	0	0	0	0	1	0	0	0	0	0	0	0	1	0	1	707	0	46	119	1	1	13	6.56103086471558	169	664
651	1098	1	1	16	31	NA	NA	520447	1	0	0	0	0	0	1	0	0	0	0	0	0	0	1	1	1	928	0	42	120	1	1	9	6.83303165435791	81	664
652	1099	1	1	12	24	NA	NA	360396	1	0	0	0	0	0	1	0	0	0	0	0	0	0	0	0	1	300	0	36	NA	1	1	6	5.70378255844116	36	664
653	1100	1	1	15	27	18	12	370732	1	0	0	0	0	0	1	0	0	0	0	0	0	0	1	0	0	365	0	46	112	1	1	6	5.89989757537842	36	664
654	1101	1	1	12	30	NA	NA	468402	1	0	0	0	0	0	1	0	0	0	0	0	0	0	1	0	1	645	0	NA	97	1	1	12	6.46925020217896	144	664
655	1104	0	1	18	25	14	12	360396	1	0	0	0	0	0	1	0	0	0	0	0	0	0	0	0	1	462	0	30	107	1	1	1	6.13556480407715	1	664
656	1105	0	1	18	33	8	12	358351	1	0	0	0	0	0	1	0	0	0	0	0	0	0	1	0	1	1026	0	41	117	1	1	9	6.93342304229736	81	664
657	1107	0	1	12	24	12	12	360396	1	0	0	0	0	0	1	0	0	0	0	0	0	0	1	0	1	525	0	34	NA	1	1	6	6.26339817047119	36	664
658	1110	0	1	18	29	16	16	484311	1	0	0	0	0	0	1	0	0	0	0	0	0	0	1	0	1	375	0	41	125	6	1	5	5.92692613601685	25	664
659	1111	0	1	18	34	18	16	358351	1	0	0	0	0	0	1	0	0	0	0	0	0	0	1	0	1	1538	0	47	112	1	1	10	7.33823823928833	100	664
660	1112	0	1	18	33	18	14	358351	1	0	0	0	0	0	1	0	0	0	0	0	0	0	1	0	1	923	0	46	106	5	1	9	6.82762908935547	81	664
661	1113	0	1	13	26	8	12	370732	1	0	0	0	0	0	1	0	0	0	0	0	0	0	1	0	1	568	0	40	104	4	1	7	6.34212160110474	49	664
662	1114	0	1	14	25	8	12	360396	1	0	0	0	0	0	1	0	0	0	0	0	0	0	1	0	1	600	0	23	89	6	1	5	6.39692974090576	25	664
663	1115	0	1	15	27	17	12	370732	1	0	0	0	0	0	1	0	0	0	0	0	0	0	1	0	1	721	0	38	116	1	1	6	6.58063936233521	36	664
664	1116	0	1	17	24	18	12	360396	1	0	0	0	0	0	1	0	0	0	0	0	0	0	1	0	1	1116	1	46	NA	6	1	1	7.01750612258911	1	664
665	1121	0	1	14	27	NA	8	370732	0	1	0	0	0	0	1	0	0	0	0	0	0	0	1	0	1	712	0	44	123	1	1	7	6.56807804107666	49	664
666	1122	0	1	16	29	NA	8	484311	1	0	0	0	0	0	1	0	0	0	0	0	0	0	1	0	1	808	0	40	118	1	1	7	6.69456195831299	49	664
667	1124	0	1	11	27	8	12	370732	1	0	0	0	0	0	1	0	0	0	0	0	0	0	1	0	1	925	0	31	106	1	1	10	6.82979393005371	100	664
668	1126	0	1	9	25	NA	NA	360396	0	0	0	0	0	0	1	0	0	0	0	0	0	0	1	0	1	550	0	22	NA	4	1	10	6.30991840362549	100	664
669	1127	0	1	12	26	NA	NA	358554	0	1	0	0	0	0	1	0	0	0	0	0	0	0	1	0	1	271	0	20	91	6	1	8	5.60211896896362	64	664
670	1129	1	1	7	32	8	11	398168	1	0	0	0	0	1	0	0	0	0	0	0	0	0	1	0	1	833	0	22	NA	1	1	19	6.7250337600708	361	663
671	1130	1	1	12	30	7	12	484311	1	0	0	0	0	1	0	0	0	0	0	0	0	0	1	0	1	1200	0	29	103	1	1	12	7.09007692337036	144	663
672	1131	1	1	14	33	6	8	358351	1	0	0	0	0	1	0	0	0	0	0	0	0	0	1	0	1	581	0	40	114	1	0	13	6.36475086212158	169	663
673	1132	1	1	17	34	12	8	141996	1	0	0	0	0	1	0	0	0	0	0	0	0	1	1	0	1	686	0	41	105	1	1	11	6.53087759017944	121	663
674	1133	1	1	18	32	12	8	141996	1	0	0	0	0	1	0	0	0	0	0	0	0	1	1	0	1	1000	0	34	84	1	1	8	6.90775537490845	64	663
675	1134	1	1	13	24	9	8	96681	1	0	0	0	0	1	0	0	0	0	0	0	0	1	1	0	1	537	0	31	NA	6	1	5	6.28599786758423	25	663
676	1135	1	1	12	28	NA	11	99110	0	0	0	0	0	1	0	0	0	0	0	0	0	1	1	0	1	690	1	32	89	1	0	10	6.53669166564941	100	663
677	1139	1	1	12	28	12	16	370732	1	0	0	0	0	1	0	0	0	0	0	0	0	0	1	0	1	500	0	36	81	6	1	10	6.21460819244385	100	663
678	1141	0	1	13	33	3	12	358351	1	0	0	0	0	1	0	0	0	0	0	0	0	0	1	0	1	750	0	36	118	1	1	14	6.62007331848145	196	663
679	1142	0	1	17	29	8	16	484311	1	0	0	0	0	1	0	0	0	0	0	0	0	0	1	1	1	913	1	38	91	1	1	6	6.81673574447632	36	663
680	1144	0	1	15	24	8	16	360396	1	0	0	0	0	1	0	0	0	0	0	0	0	0	1	0	1	600	0	19	NA	6	1	3	6.39692974090576	9	663
681	1145	0	1	16	24	12	12	348558	1	0	0	0	0	1	0	0	0	0	0	0	0	0	1	0	1	577	0	29	113	6	1	2	6.35784244537354	4	663
682	1146	0	1	12	26	8	12	358554	1	0	0	0	0	1	0	0	0	0	0	0	0	0	1	0	1	601	0	38	121	1	1	8	6.39859485626221	64	663
683	1147	0	1	12	31	6	12	468402	1	0	0	0	0	1	0	0	0	0	0	0	0	0	1	0	1	577	0	36	102	1	1	13	6.35784244537354	169	663
684	1148	0	1	12	32	NA	6	346581	1	0	0	0	0	1	0	0	0	0	0	0	0	0	1	0	1	677	0	36	104	5	1	14	6.51767110824585	196	663
685	1150	0	1	18	27	9	10	405452	1	0	0	0	0	1	0	0	0	0	0	0	0	1	1	0	1	473	0	31	106	1	1	3	6.159095287323	9	663
686	1152	0	1	14	24	8	12	720791	1	0	0	0	0	1	0	0	0	0	0	0	0	0	1	0	1	350	1	39	NA	1	1	4	5.85793304443359	16	663
687	1153	0	1	15	32	9	12	716702	1	0	0	0	0	1	0	0	0	0	0	0	0	0	1	0	1	620	1	45	108	1	1	11	6.4297194480896	121	663
688	1154	0	1	16	24	12	12	360396	1	0	0	0	0	1	0	0	0	0	0	0	0	0	1	0	1	378	0	41	108	6	0	2	5.93489408493042	4	663
689	1155	0	1	16	25	16	13	360396	1	0	0	0	0	1	0	0	0	0	0	0	0	0	1	0	1	243	0	51	121	6	1	3	5.49306154251099	9	663
690	1156	0	1	12	26	7	12	358554	1	0	0	0	0	1	0	0	0	0	0	0	0	0	1	0	1	750	0	NA	87	4	0	8	6.62007331848145	64	663
691	1158	0	1	18	30	12	14	468402	1	0	0	0	0	1	0	0	0	0	0	0	0	0	0	0	1	441	0	35	107	1	1	6	6.08904504776001	36	663
692	1159	0	1	14	29	12	14	468402	1	0	0	0	0	1	0	0	0	0	0	0	0	0	1	0	1	688	0	43	112	6	1	9	6.53378868103027	81	663
693	1160	0	1	18	25	12	14	348558	1	0	0	0	0	1	0	0	0	0	0	0	0	0	0	0	1	501	0	29	116	1	1	1	6.21660614013672	1	663
694	1161	0	1	12	29	12	12	520447	1	0	0	0	0	1	0	0	0	0	0	0	0	0	1	0	1	400	0	36	115	6	1	11	5.99146461486816	121	663
695	1162	0	1	12	26	12	12	398393	1	0	0	0	0	1	0	0	0	0	0	0	0	0	1	0	1	981	0	39	107	1	1	8	6.88857269287109	64	663
696	1163	1	1	14	30	12	12	484311	1	0	0	0	0	0	1	0	0	0	0	0	0	0	1	1	1	649	0	36	117	1	1	10	6.47543287277222	100	664
697	1168	1	1	12	32	NA	NA	358351	0	1	0	0	0	0	1	0	0	0	0	0	0	0	1	0	1	625	0	36	110	1	1	14	6.43775177001953	196	664
698	1169	1	1	16	28	12	11	99110	1	0	0	0	0	0	1	0	0	0	0	0	0	1	1	0	0	707	1	35	97	1	1	6	6.56103086471558	36	664
699	1172	1	1	12	29	11	12	538123	1	0	0	0	0	0	1	0	0	0	0	0	0	0	1	0	1	1043	0	42	96	4	1	11	6.94985628128052	121	664
700	1173	1	1	12	27	8	8	370732	1	0	0	0	0	0	1	0	0	0	0	0	0	0	1	0	1	761	0	45	NA	1	1	9	6.63463354110718	81	664
701	1177	1	1	13	25	14	12	360396	0	0	1	0	0	0	1	0	0	0	0	0	0	0	0	0	1	524	0	28	NA	1	1	6	6.2614917755127	36	664
702	1179	1	1	13	27	6	6	99110	1	0	0	0	0	0	1	0	0	0	0	0	0	1	1	0	1	575	0	34	91	1	1	8	6.3543701171875	64	664
703	1180	1	1	14	26	NA	6	99110	0	1	0	0	0	0	1	0	0	0	0	0	0	1	1	0	1	865	0	31	97	6	1	6	6.76272964477539	36	664
704	1183	1	1	12	28	12	8	99110	1	0	0	0	0	0	1	0	0	0	0	0	0	1	1	0	1	713	0	38	90	1	1	10	6.56948137283325	100	664
705	1184	1	1	16	27	7	8	370732	1	0	0	0	0	0	1	0	0	0	0	0	0	0	1	0	1	673	0	NA	112	1	1	5	6.51174545288086	25	664
706	1185	1	1	12	25	7	8	360396	1	0	0	0	0	0	1	0	0	0	0	0	0	0	1	0	1	662	0	27	97	1	1	7	6.4952654838562	49	664
707	1186	1	1	14	29	11	8	484311	1	0	0	0	0	0	1	0	0	0	0	0	0	0	1	0	1	543	0	45	120	1	1	9	6.29710912704468	81	664
708	1187	1	1	13	25	12	12	360396	1	0	0	0	0	0	1	0	0	0	0	0	0	0	1	0	1	525	1	40	109	6	1	6	6.26339817047119	36	664
709	1188	1	1	12	28	NA	8	370732	0	1	0	0	0	0	1	0	0	0	0	0	0	0	1	0	1	640	0	36	NA	1	1	10	6.46146821975708	100	664
710	1189	1	1	12	26	NA	8	370732	0	1	0	0	0	0	1	0	0	0	0	0	0	0	1	0	1	297	0	26	NA	6	1	8	5.69373226165771	64	664
711	1191	1	1	8	33	NA	NA	141996	0	0	0	0	0	0	1	0	0	0	0	0	0	1	1	0	1	947	0	37	NA	5	0	19	6.85329914093018	361	664
712	1192	1	1	12	34	8	9	141996	1	0	0	0	0	0	1	0	0	0	0	0	0	1	1	0	1	500	0	40	99	1	1	16	6.21460819244385	256	664
713	1202	1	1	13	25	5	7	96681	1	0	0	0	0	0	1	0	0	0	0	0	0	1	1	0	1	620	0	43	NA	4	1	6	6.4297194480896	36	664
714	1203	1	1	12	25	NA	10	96681	0	1	0	0	0	0	1	0	0	0	0	0	0	1	1	0	1	277	0	31	NA	1	NA	7	5.6240177154541	49	664
715	1205	0	1	10	26	5	8	370732	1	0	0	0	0	1	0	0	0	0	0	0	0	0	0	1	1	240	0	29	99	1	1	10	5.48063898086548	100	663
716	1206	0	1	10	25	5	8	360396	1	0	0	0	0	1	0	0	0	0	0	0	0	0	0	1	1	240	0	34	NA	6	1	9	5.48063898086548	81	663
717	1207	0	1	12	33	NA	NA	398168	1	0	0	0	0	1	0	0	0	0	0	0	0	0	1	0	1	462	0	32	85	1	1	15	6.13556480407715	225	663
718	1209	0	1	12	27	NA	11	99110	0	1	0	0	0	1	0	0	0	0	0	0	0	1	1	0	1	404	0	32	97	6	1	9	6.00141477584839	81	663
719	1210	0	1	12	25	NA	11	96681	0	1	0	0	0	1	0	0	0	0	0	0	0	1	1	0	1	450	0	40	95	1	1	7	6.10924768447876	49	663
720	1213	0	1	12	24	3	2	395512	1	0	0	0	0	1	0	0	0	0	0	0	0	1	1	0	1	250	0	28	NA	6	1	6	5.52146100997925	36	663
721	1215	0	1	11	26	NA	9	450502	1	0	0	0	0	1	0	0	0	0	0	0	0	1	1	0	1	727	0	23	NA	4	1	9	6.58892631530762	81	663
722	1216	0	1	12	24	NA	9	439458	0	1	0	0	0	1	0	0	0	0	0	0	0	1	1	0	1	667	0	30	NA	1	1	6	6.50278997421265	36	663
723	1224	0	1	12	28	NA	6	117131	1	0	0	0	0	1	0	0	0	0	0	0	0	1	1	0	1	962	0	31	80	4	1	10	6.86901426315308	100	663
724	1228	0	1	14	27	NA	8	90623	0	1	0	0	0	1	0	0	0	0	0	0	0	0	1	0	1	750	0	44	126	6	1	7	6.62007331848145	49	663
725	1230	0	1	14	25	8	8	360396	1	0	0	0	0	1	0	0	0	0	0	0	0	0	1	0	1	667	0	20	NA	6	1	5	6.50278997421265	25	663
726	1231	0	1	17	34	8	12	358351	1	0	0	0	0	1	0	0	0	0	0	0	0	0	0	0	1	692	0	49	109	1	1	11	6.53958606719971	121	663
727	1233	0	1	12	25	6	12	96681	1	0	0	0	0	1	0	0	0	0	0	0	0	1	1	0	1	465	0	21	NA	1	1	7	6.1420373916626	49	663
728	1235	0	1	12	30	NA	NA	150105	0	1	0	0	0	1	0	0	0	0	0	0	0	1	1	0	1	641	0	38	NA	5	1	12	6.46302938461304	144	663
729	1236	0	1	11	29	NA	11	150105	0	1	0	0	0	1	0	0	0	0	0	0	0	1	1	0	1	710	0	22	86	1	1	12	6.56526517868042	144	663
730	1238	0	1	13	25	NA	10	96681	0	1	0	0	0	1	0	0	0	0	0	0	0	1	1	0	1	425	0	22	NA	6	1	6	6.05208921432495	36	663
731	1243	0	1	12	27	12	12	370732	0	0	1	0	0	1	0	0	0	0	0	0	0	0	1	0	1	833	0	46	112	1	1	9	6.7250337600708	81	663
732	1244	0	1	12	26	12	12	370732	0	0	1	0	0	1	0	0	0	0	0	0	0	0	1	0	1	308	1	41	98	1	1	8	5.73009967803955	64	663
733	1245	0	1	16	29	12	12	484311	1	0	0	0	0	1	0	0	0	0	0	0	0	0	1	0	1	625	0	48	119	4	1	7	6.43775177001953	49	663
734	1246	0	1	16	32	13	16	398168	1	0	0	0	0	1	0	0	0	0	0	0	0	0	1	0	1	1442	0	26	NA	1	1	10	7.2737865447998	100	663
735	1248	0	1	16	25	12	12	400440	1	0	0	0	0	1	0	0	0	0	0	0	0	0	1	0	1	673	0	38	102	1	1	3	6.51174545288086	9	663
736	1250	0	1	17	28	14	14	370732	1	0	0	0	0	1	0	0	0	0	0	0	0	0	1	0	1	1346	0	46	NA	1	1	5	7.20489263534546	25	663
737	1251	0	1	17	33	12	10	398168	1	0	0	0	0	1	0	0	0	0	0	0	0	0	1	0	1	400	0	41	128	4	1	10	5.99146461486816	100	663
738	1252	0	1	9	34	12	NA	358351	1	0	0	0	0	1	0	0	0	0	0	0	0	0	0	0	1	518	0	38	82	1	1	19	6.24997520446777	361	663
739	1253	0	1	14	26	16	16	370732	1	0	0	0	0	1	0	0	0	0	0	0	0	0	1	0	1	456	0	30	NA	1	1	6	6.12249279022217	36	663
740	1255	0	1	17	33	12	12	398168	1	0	0	0	0	1	0	0	0	0	0	0	0	0	1	1	1	409	0	42	113	1	1	10	6.0137152671814	100	663
741	1256	0	1	18	34	5	9	398168	1	0	0	0	0	1	0	0	0	0	0	0	0	0	1	0	1	559	0	45	105	6	1	10	6.32614946365356	100	663
742	1258	0	1	12	24	10	9	96681	1	0	0	0	0	1	0	0	0	0	0	0	0	1	1	0	1	230	0	32	NA	1	1	6	5.43807935714722	36	663
743	1260	1	1	17	27	18	18	370732	1	0	0	0	0	1	0	0	0	0	0	0	0	0	1	0	1	1026	1	46	124	6	1	4	6.93342304229736	16	663
744	1262	1	1	12	27	13	13	370732	1	0	0	0	0	1	0	0	0	0	0	0	0	0	1	0	1	1082	0	48	NA	1	1	9	6.9865665435791	81	663
745	1263	1	1	14	24	13	13	360396	1	0	0	0	0	1	0	0	0	0	0	0	0	0	1	0	1	1202	0	39	94	1	1	4	7.09174203872681	16	663
746	1264	1	1	17	25	NA	12	360396	1	0	0	0	0	1	0	0	0	0	0	0	0	0	0	0	1	329	0	40	117	1	1	2	5.79605770111084	4	663
747	1266	1	1	18	27	14	14	370732	1	0	0	0	0	1	0	0	0	0	0	0	0	0	1	0	1	481	0	39	116	6	1	3	6.17586708068848	9	663
748	1267	1	1	18	24	14	NA	360396	1	0	0	0	0	1	0	0	0	0	0	0	0	0	1	1	1	673	0	33	NA	6	NA	0	6.51174545288086	0	663
749	1268	1	1	17	31	12	12	538123	1	0	0	0	0	1	0	0	0	0	0	0	0	0	1	0	0	1683	0	41	NA	6	1	8	7.4283332824707	64	663
750	1269	1	1	16	34	12	12	358351	1	0	0	0	0	1	0	0	0	0	0	0	0	0	1	0	1	1282	0	40	112	1	1	12	7.15617656707764	144	663
751	1272	1	1	12	24	12	14	360396	1	0	0	0	0	1	0	0	0	0	0	0	0	0	1	0	1	577	0	23	NA	6	1	6	6.35784244537354	36	663
752	1273	1	1	18	27	9	9	411924	1	0	0	0	0	1	0	0	0	0	0	0	0	0	1	0	1	444	0	31	105	6	1	3	6.09582471847534	9	663
753	1275	1	1	16	28	NA	9	99110	0	1	0	0	0	1	0	0	0	0	0	0	0	1	1	0	1	481	0	34	87	6	1	6	6.17586708068848	36	663
754	1277	1	1	12	24	16	12	96681	1	0	0	0	0	1	0	0	0	0	0	0	0	1	1	0	1	467	0	NA	108	6	1	6	6.14632940292358	36	663
755	1279	1	1	6	31	3	3	614067	1	0	0	0	0	1	0	0	0	0	0	0	0	0	1	0	1	668	0	40	NA	1	0	19	6.50428819656372	361	663
756	1283	1	1	15	27	12	12	411924	1	0	0	0	0	1	0	0	0	0	0	0	0	0	1	0	1	286	0	36	89	1	1	6	5.65599203109741	36	663
757	1284	1	1	18	33	12	12	358351	1	0	0	0	0	1	0	0	0	0	0	0	0	0	1	0	1	577	0	NA	119	1	1	9	6.35784244537354	81	663
758	1285	1	1	14	29	12	12	484311	1	0	0	0	0	1	0	0	0	0	0	0	0	0	1	0	1	721	0	34	97	1	1	9	6.58063936233521	81	663
759	1286	1	1	12	25	6	8	360396	1	0	0	0	0	1	0	0	0	0	0	0	0	0	1	0	1	462	0	28	89	1	1	7	6.13556480407715	49	663
760	1287	1	1	15	25	12	10	360396	1	0	0	0	0	1	0	0	0	0	0	0	0	0	1	0	1	750	0	28	NA	1	0	4	6.62007331848145	16	663
761	1288	1	1	12	24	6	12	360396	1	0	0	0	0	1	0	0	0	0	0	0	0	0	1	0	1	200	0	39	131	6	1	6	5.29831743240356	36	663
762	1293	1	1	12	27	12	10	370732	1	0	0	0	0	1	0	0	0	0	0	0	0	0	1	0	1	650	0	26	NA	1	1	9	6.47697257995605	81	663
763	1295	1	1	18	28	12	11	370732	0	0	0	0	0	1	0	0	0	0	0	0	0	0	1	0	1	481	0	30	NA	6	1	4	6.17586708068848	16	663
764	1298	1	1	11	24	9	NA	360396	0	1	0	0	0	1	0	0	0	0	0	0	0	0	1	0	1	600	0	38	NA	1	0	7	6.39692974090576	49	663
765	1305	1	1	16	28	16	16	370732	1	0	0	0	0	1	0	0	0	0	0	0	0	0	1	1	1	769	0	35	85	1	1	6	6.64509105682373	36	663
766	1306	1	1	17	27	16	16	370732	1	0	0	0	0	1	0	0	0	0	0	0	0	0	1	0	1	775	1	26	132	1	1	4	6.65286302566528	16	663
767	1307	1	1	16	24	16	16	360396	1	0	0	0	0	1	0	0	0	0	0	0	0	0	1	0	1	641	0	28	114	1	1	2	6.46302938461304	4	663
768	1310	1	1	14	33	14	10	358351	1	0	0	0	0	1	0	0	0	0	0	0	0	0	1	0	1	1055	0	35	98	1	1	13	6.96129608154297	169	663
769	1311	1	1	16	31	14	12	484311	1	0	0	0	0	1	0	0	0	0	0	0	0	0	1	0	1	676	0	44	110	6	1	9	6.51619291305542	81	663
770	1312	1	1	12	28	NA	NA	370732	0	0	0	0	0	1	0	0	0	0	0	0	0	0	1	0	1	691	0	41	124	6	1	10	6.53813982009888	100	663
771	1313	1	1	17	30	14	12	484311	1	0	0	0	0	1	0	0	0	0	0	0	0	0	1	0	1	962	1	41	118	1	1	7	6.86901426315308	49	663
772	1314	1	1	13	28	14	12	370732	1	0	0	0	0	1	0	0	0	0	0	0	0	0	1	0	1	400	0	32	90	5	1	9	5.99146461486816	81	663
773	1315	1	1	16	27	14	12	370732	1	0	0	0	0	1	0	0	0	0	0	0	0	0	1	0	1	673	0	38	108	1	1	5	6.51174545288086	25	663
774	1323	1	1	18	34	10	11	141996	1	0	0	0	0	1	0	0	0	0	0	0	0	1	1	0	1	1442	0	42	112	1	1	10	7.2737865447998	100	663
775	1334	1	1	18	32	16	10	358351	1	0	0	0	0	1	0	0	0	0	0	0	0	0	1	0	1	529	0	38	100	1	1	8	6.27098846435547	64	663
776	1336	1	1	14	27	9	11	99110	1	0	0	0	0	1	0	0	0	0	0	0	0	1	1	0	1	700	0	21	84	1	1	7	6.55108022689819	49	663
777	1337	1	1	8	34	NA	4	141996	0	0	1	0	0	1	0	0	0	0	0	0	0	1	1	0	1	675	0	36	NA	1	0	20	6.51471281051636	400	663
778	1338	1	1	18	25	8	10	360396	1	0	0	0	0	1	0	0	0	0	0	0	0	0	1	0	1	494	0	34	97	1	1	1	6.20253562927246	1	663
779	1340	1	1	12	24	12	8	360396	1	0	0	0	0	1	0	0	0	0	0	0	0	0	1	0	1	500	0	26	113	1	1	6	6.21460819244385	36	663
780	1349	1	1	16	24	NA	NA	96681	1	0	0	0	0	1	0	0	0	0	0	0	0	1	1	0	1	450	0	27	NA	6	0	2	6.10924768447876	4	663
781	1350	1	1	13	25	NA	8	96681	0	1	0	0	0	1	0	0	0	0	0	0	0	1	1	0	1	601	0	27	NA	6	1	6	6.39859485626221	36	663
782	1353	1	1	13	28	9	12	99110	1	0	0	0	0	1	0	0	0	0	0	0	0	1	1	0	1	717	1	37	105	6	1	9	6.57507562637329	81	663
783	1354	1	1	12	29	9	10	150105	1	0	0	0	0	1	0	0	0	0	0	0	0	1	1	0	1	575	0	28	88	5	1	11	6.3543701171875	121	663
784	1355	1	1	12	25	9	10	96681	1	0	0	0	0	1	0	0	0	0	0	0	0	1	1	0	1	350	0	33	74	1	1	7	5.85793304443359	49	663
785	1356	1	1	12	24	9	10	96681	1	0	0	0	0	1	0	0	0	0	0	0	0	1	1	0	1	350	0	31	NA	6	0	6	5.85793304443359	36	663
786	1358	0	1	16	29	12	12	484311	1	0	0	0	0	1	0	0	0	0	0	0	0	0	1	0	1	643	0	46	115	1	1	7	6.46614456176758	49	663
787	1359	0	1	15	24	10	12	360396	1	0	0	0	0	1	0	0	0	0	0	0	0	0	1	0	1	675	0	30	NA	1	1	3	6.51471281051636	9	663
788	1360	0	1	15	28	12	12	370732	1	0	0	0	0	1	0	0	0	0	0	0	0	0	1	0	1	679	0	34	91	1	1	7	6.52062129974365	49	663
789	1361	0	1	12	27	12	9	370732	1	0	0	0	0	1	0	0	0	0	0	0	0	0	1	0	1	534	0	34	103	4	1	9	6.28039598464966	81	663
790	1362	0	1	16	31	12	10	484311	1	0	0	0	0	1	0	0	0	0	0	0	0	0	1	0	1	524	0	46	102	1	1	9	6.2614917755127	81	663
791	1363	0	1	16	28	10	10	370732	1	0	0	0	0	1	0	0	0	0	0	0	0	0	1	1	0	667	0	38	98	6	1	6	6.50278997421265	36	663
792	1364	0	1	14	26	12	NA	370732	1	0	0	0	0	1	0	0	0	0	0	0	0	0	1	0	1	370	0	35	NA	1	1	6	5.91350317001343	36	663
793	1365	0	1	15	26	12	12	370732	1	0	0	0	0	1	0	0	0	0	0	0	0	0	1	0	1	658	0	47	NA	6	1	5	6.48920488357544	25	663
794	1371	0	1	12	34	NA	NA	141996	1	0	0	0	0	1	0	0	0	0	0	0	0	1	1	0	1	700	0	39	NA	NA	0	16	6.55108022689819	256	663
795	1374	0	1	18	27	9	12	370732	1	0	0	0	0	1	0	0	0	0	0	0	0	0	1	0	1	311	0	33	82	6	1	3	5.7397928237915	9	663
796	1375	0	1	9	33	NA	9	358351	0	1	0	0	0	1	0	0	0	0	0	0	0	0	1	0	1	841	0	44	NA	1	1	18	6.73459148406982	324	663
797	1377	0	1	14	31	10	12	484311	1	0	0	0	0	1	0	0	0	0	0	0	0	0	1	0	1	660	0	47	112	1	1	11	6.4922399520874	121	663
798	1379	0	1	16	31	8	9	484311	1	0	0	0	0	1	0	0	0	0	0	0	0	0	1	0	1	692	0	41	108	1	1	9	6.53958606719971	81	663
799	1382	0	1	15	28	NA	7	370732	1	0	0	0	0	1	0	0	0	0	0	0	0	0	1	0	1	577	0	37	90	1	1	7	6.35784244537354	49	663
800	1389	0	1	17	26	9	12	370732	0	0	0	0	0	1	0	0	0	0	0	0	0	0	1	0	1	705	0	32	NA	6	1	3	6.55819797515869	9	663
801	1391	0	1	16	27	5	8	370732	1	0	0	0	0	1	0	0	0	0	0	0	0	0	1	1	1	292	0	38	111	1	1	5	5.67675399780273	25	663
802	1392	0	1	13	26	8	11	370732	1	0	0	0	0	1	0	0	0	0	0	0	0	0	1	0	1	750	0	24	96	1	1	7	6.62007331848145	49	663
803	1395	0	1	16	34	12	12	358351	1	0	0	0	0	1	0	0	0	0	0	0	0	0	1	0	1	1442	0	48	NA	1	0	12	7.2737865447998	144	663
804	1396	0	1	16	33	16	16	358351	1	0	0	0	0	1	0	0	0	0	0	0	0	0	1	0	1	1202	0	48	127	1	1	11	7.09174203872681	121	663
805	1397	0	1	15	33	NA	8	358351	1	0	0	0	0	1	0	0	0	0	0	0	0	0	1	1	1	1603	0	47	97	1	1	12	7.37963199615479	144	663
806	1399	0	1	14	32	NA	12	358351	1	0	0	0	0	1	0	0	0	0	0	0	0	0	1	1	1	769	0	50	120	4	1	12	6.64509105682373	144	663
807	1407	0	1	16	31	14	16	484311	1	0	0	0	0	1	0	0	0	0	0	0	0	0	1	0	1	513	0	41	101	6	1	9	6.24027585983276	81	663
808	1408	0	1	12	31	NA	8	484311	0	1	0	0	0	1	0	0	0	0	0	0	0	0	1	0	1	805	0	38	100	1	0	13	6.69084215164185	169	663
809	1409	0	1	17	34	8	8	358351	1	0	0	0	0	1	0	0	0	0	0	0	0	0	1	0	1	962	1	44	99	1	1	11	6.86901426315308	121	663
810	1411	0	1	12	25	16	16	360396	1	0	0	0	0	1	0	0	0	0	0	0	0	0	1	0	1	675	0	NA	104	1	1	7	6.51471281051636	49	663
811	1413	0	1	13	24	8	8	360396	1	0	0	0	0	1	0	0	0	0	0	0	0	0	1	0	1	398	0	NA	116	1	1	5	5.98645210266113	25	663
812	1416	0	1	14	33	12	12	358351	1	0	0	0	0	1	0	0	0	0	0	0	0	0	1	0	1	855	0	40	120	1	1	13	6.75110149383545	169	663
813	1421	0	1	11	25	NA	9	96681	0	1	0	0	0	1	0	0	0	0	0	0	0	1	1	0	1	693	0	27	95	1	0	8	6.54102993011475	64	663
814	1422	0	1	11	24	8	9	114259	1	0	0	0	0	1	0	0	0	0	0	0	0	1	1	0	1	641	0	27	NA	5	0	7	6.46302938461304	49	663
815	1423	0	1	13	27	10	8	99110	1	0	0	0	0	1	0	0	0	0	0	0	0	1	1	0	1	345	0	34	99	1	0	8	5.84354448318481	64	663
816	1424	0	1	12	27	NA	NA	99110	1	0	0	0	0	1	0	0	0	0	0	0	0	1	1	0	1	561	0	24	68	5	1	9	6.32972097396851	81	663
817	1425	0	1	12	24	9	11	96681	1	0	0	0	0	1	0	0	0	0	0	0	0	1	1	0	1	684	0	21	NA	1	1	6	6.52795791625977	36	663
818	1428	0	1	16	29	16	16	484311	1	0	0	0	0	1	0	0	0	0	0	0	0	0	1	1	1	469	0	49	122	1	1	7	6.1506028175354	49	663
819	1430	0	1	16	26	12	12	370732	0	0	1	0	0	1	0	0	0	0	0	0	0	0	1	0	1	300	0	37	106	6	1	4	5.70378255844116	16	663
820	1431	0	1	18	25	12	9	360396	1	0	0	0	0	1	0	0	0	0	0	0	0	0	1	0	1	673	0	37	101	1	1	1	6.51174545288086	1	663
821	1432	0	1	16	24	12	9	360396	1	0	0	0	0	1	0	0	0	0	0	0	0	0	1	0	1	385	0	29	NA	6	1	2	5.95324325561523	4	663
822	1436	0	1	16	33	8	6	358351	1	0	0	0	0	1	0	0	0	0	0	0	0	0	1	0	1	808	0	45	104	1	1	11	6.69456195831299	121	663
823	1438	0	1	17	24	12	12	360396	1	0	0	0	0	1	0	0	0	0	0	0	0	0	1	0	1	548	1	40	NA	6	1	1	6.30627536773682	1	663
824	1439	0	1	16	26	12	12	370732	1	0	0	0	0	1	0	0	0	0	0	0	0	0	1	0	1	500	0	38	NA	6	1	4	6.21460819244385	16	663
825	1440	0	1	13	29	11	12	468402	1	0	0	0	0	1	0	0	0	0	0	0	0	0	1	0	1	727	1	38	99	1	1	10	6.58892631530762	100	663
826	1441	0	1	16	28	11	12	358554	1	0	0	0	0	1	0	0	0	0	0	0	0	0	1	0	0	524	0	29	NA	1	1	6	6.2614917755127	36	663
827	1445	0	1	15	24	2	8	96681	1	0	0	0	0	1	0	0	0	0	0	0	0	1	1	0	1	450	0	36	NA	6	1	3	6.10924768447876	9	663
828	1448	0	1	12	28	6	8	99110	1	0	0	0	0	1	0	0	0	0	0	0	0	1	1	0	1	755	0	34	NA	1	0	10	6.62671756744385	100	663
829	1449	0	1	12	24	11	NA	96681	0	0	0	0	0	1	0	0	0	0	0	0	0	1	1	0	1	640	0	37	NA	1	0	6	6.46146821975708	36	663
830	1454	0	1	12	24	10	12	96681	1	0	0	0	0	1	0	0	0	0	0	0	0	1	1	0	1	313	0	30	NA	1	1	6	5.74620342254639	36	663
831	1458	0	1	12	29	12	12	484311	1	0	0	0	0	1	0	0	0	0	0	0	0	0	1	0	1	1425	0	37	101	1	0	11	7.26192712783813	121	663
832	1459	0	1	12	28	11	5	411924	1	0	0	0	0	1	0	0	0	0	0	0	0	0	1	0	1	761	0	23	110	6	1	10	6.63463354110718	100	663
833	1460	0	1	12	26	11	5	411924	1	0	0	0	0	1	0	0	0	0	0	0	0	0	1	0	1	600	0	35	94	1	1	8	6.39692974090576	64	663
834	1461	0	1	16	32	12	15	398168	1	0	0	0	0	1	0	0	0	0	0	0	0	0	1	0	1	1111	0	42	111	1	1	10	7.01301574707031	100	663
835	1462	0	1	16	33	13	17	398168	1	0	0	0	0	1	0	0	0	0	0	0	0	0	1	0	1	763	0	50	120	1	1	11	6.63725805282593	121	663
836	1463	0	1	12	32	8	8	358351	1	0	0	0	0	1	0	0	0	0	0	0	0	0	1	0	1	650	0	45	108	1	1	14	6.47697257995605	196	663
837	1464	0	1	14	27	16	16	370732	1	0	0	0	0	1	0	0	0	0	0	0	0	0	1	0	1	1155	0	39	111	1	1	7	7.05185556411743	49	663
838	1465	0	1	12	24	9	12	360396	1	0	0	0	0	1	0	0	0	0	0	0	0	0	1	0	1	600	0	25	NA	1	1	6	6.39692974090576	36	663
839	1467	0	1	12	29	11	11	468402	1	0	0	0	0	1	0	0	0	0	0	0	0	0	1	0	1	555	0	31	103	1	0	11	6.31896829605103	121	663
840	1468	0	1	11	28	11	11	358554	1	0	0	0	0	1	0	0	0	0	0	0	0	0	1	0	1	543	1	25	NA	1	0	11	6.29710912704468	121	663
841	1469	0	1	11	25	11	11	348558	1	0	0	0	0	1	0	0	0	0	0	0	0	0	1	0	1	550	1	31	NA	1	0	8	6.30991840362549	64	663
842	1470	0	1	11	31	NA	NA	520447	0	0	0	0	0	1	0	0	0	0	0	0	0	0	1	0	1	800	0	39	97	1	0	14	6.68461179733276	196	663
843	1472	0	1	11	26	10	11	358554	1	0	0	0	0	1	0	0	0	0	0	0	0	0	1	0	1	1000	0	26	97	1	0	9	6.90775537490845	81	663
844	1474	0	1	12	31	13	11	468402	1	0	0	0	0	1	0	0	0	0	0	0	0	0	1	0	1	864	0	36	106	1	0	13	6.76157283782959	169	663
845	1475	0	1	13	32	NA	6	346581	0	0	1	0	0	1	0	0	0	0	0	0	0	0	1	0	1	613	0	43	109	1	1	13	6.41836500167847	169	663
846	1476	0	1	16	24	12	12	348558	1	0	0	0	0	1	0	0	0	0	0	0	0	0	1	0	1	519	0	27	NA	1	1	2	6.25190401077271	4	663
847	1480	0	1	13	30	NA	NA	150105	1	0	0	0	0	1	0	0	0	0	0	0	0	1	1	0	1	707	0	45	96	1	1	11	6.56103086471558	121	663
848	1485	0	1	13	26	10	10	99110	1	0	0	0	0	1	0	0	0	0	0	0	0	1	1	0	1	818	1	26	79	1	1	7	6.706862449646	49	663
849	1486	0	1	10	25	10	12	96681	1	0	0	0	0	1	0	0	0	0	0	0	0	1	1	0	1	300	0	31	62	6	1	9	5.70378255844116	81	663
850	1490	1	1	16	30	9	9	484311	1	0	0	0	0	1	0	0	0	0	0	0	0	0	1	0	1	702	1	47	110	1	1	8	6.55393362045288	64	663
851	1491	1	1	16	34	NA	12	358351	0	1	0	0	0	1	0	0	0	0	0	0	0	0	1	0	1	1322	0	47	117	1	1	12	7.1869010925293	144	663
852	1492	1	1	12	27	NA	12	99110	0	1	0	0	0	1	0	0	0	0	0	0	0	1	1	0	1	380	1	25	72	1	0	9	5.94017124176025	81	663
853	1495	1	1	11	26	NA	NA	99110	0	0	0	0	0	1	0	0	0	0	0	0	0	1	1	0	1	400	0	30	83	6	1	9	5.99146461486816	81	663
854	1496	1	1	11	25	NA	NA	96681	0	1	0	0	0	1	0	0	0	0	0	0	0	1	1	0	1	498	0	22	99	1	1	8	6.21059989929199	64	663
855	1497	1	1	10	33	NA	11	167813	0	1	0	0	0	1	0	0	0	0	0	0	0	1	1	0	1	663	0	18	72	1	1	17	6.49677515029907	289	663
856	1498	1	1	10	33	8	11	141996	1	0	0	0	0	1	0	0	0	0	0	0	0	1	1	0	1	600	0	29	88	5	0	17	6.39692974090576	289	663
857	1499	1	1	18	32	16	12	358351	1	0	0	0	0	1	0	0	0	0	0	0	0	0	0	1	1	1034	0	48	123	1	1	8	6.94119024276733	64	663
858	1502	1	1	14	25	12	12	360396	1	0	0	0	0	1	0	0	0	0	0	0	0	0	1	0	1	1079	0	23	91	6	1	5	6.98378992080688	25	663
859	1503	1	1	18	24	12	12	360396	1	0	0	0	0	1	0	0	0	0	0	0	0	0	1	1	1	400	0	31	98	6	1	0	5.99146461486816	0	663
860	1504	1	1	16	33	13	12	358351	1	0	0	0	0	1	0	0	0	0	0	0	0	0	1	0	1	641	0	37	119	6	0	11	6.46302938461304	121	663
861	1506	1	1	12	32	NA	8	358351	0	0	1	0	0	1	0	0	0	0	0	0	0	0	1	0	1	620	0	33	87	1	0	14	6.4297194480896	196	663
862	1508	1	1	17	30	12	11	538123	0	0	1	0	0	1	0	0	0	0	0	0	0	0	1	0	1	481	0	49	121	4	1	7	6.17586708068848	49	663
863	1510	1	1	16	33	8	8	358351	1	0	0	0	0	1	0	0	0	0	0	0	0	0	1	0	1	1058	0	41	NA	6	1	11	6.96413564682007	121	663
864	1511	1	1	12	26	8	12	370732	1	0	0	0	0	1	0	0	0	0	0	0	0	0	1	0	1	545	0	33	112	1	1	8	6.30078601837158	64	663
865	1512	1	1	14	26	12	12	370732	1	0	0	0	0	1	0	0	0	0	0	0	0	0	1	0	1	786	0	38	113	6	1	6	6.66695690155029	36	663
866	1513	1	1	18	25	12	12	360396	1	0	0	0	0	1	0	0	0	0	0	0	0	0	1	0	1	485	0	38	125	6	1	1	6.18414878845215	1	663
867	1514	1	1	14	34	11	11	358351	1	0	0	0	0	1	0	0	0	0	0	0	0	0	1	0	1	722	1	45	121	1	1	14	6.58202505111694	196	663
868	1515	1	1	15	28	12	12	370732	1	0	0	0	0	1	0	0	0	0	0	0	0	0	1	0	1	695	0	47	128	1	1	7	6.54391193389893	49	663
869	1516	1	1	15	34	12	12	358351	1	0	0	0	0	1	0	0	0	0	0	0	0	0	1	0	1	549	0	41	NA	4	1	13	6.30809831619263	169	663
870	1517	1	1	15	32	15	12	358351	1	0	0	0	0	1	0	0	0	0	0	0	0	0	1	0	1	793	0	36	103	1	1	11	6.67582321166992	121	663
871	1518	1	1	16	33	18	16	398168	1	0	0	0	0	1	0	0	0	0	0	0	0	0	1	1	1	1923	0	48	99	1	1	11	7.56164169311523	121	663
872	1520	1	1	15	33	12	12	358351	1	0	0	0	0	1	0	0	0	0	0	0	0	0	1	0	1	793	0	40	101	1	1	12	6.67582321166992	144	663
873	1521	0	1	15	28	NA	NA	370732	0	0	0	0	0	1	0	0	0	0	0	0	0	0	1	0	1	900	0	34	117	5	1	7	6.80239486694336	49	663
874	1523	0	1	14	32	8	8	358351	1	0	0	0	0	1	0	0	0	0	0	0	0	0	1	0	1	654	0	41	109	1	1	12	6.4831075668335	144	663
875	1526	0	1	12	27	12	12	370732	1	0	0	0	0	1	0	0	0	0	0	0	0	0	1	0	1	513	0	46	73	6	1	9	6.24027585983276	81	663
876	1528	0	1	14	29	NA	12	538123	0	1	0	0	0	1	0	0	0	0	0	0	0	0	1	0	1	384	1	38	88	4	1	9	5.95064258575439	81	663
877	1529	0	1	16	27	16	16	370732	1	0	0	0	0	1	0	0	0	0	0	0	0	0	0	1	1	500	0	27	116	1	1	5	6.21460819244385	25	663
878	1530	0	1	15	25	12	11	360396	1	0	0	0	0	1	0	0	0	0	0	0	0	0	1	0	1	601	1	40	137	6	1	4	6.39859485626221	16	663
879	1531	0	1	12	27	12	12	370732	1	0	0	0	0	1	0	0	0	0	0	0	0	0	1	0	1	438	0	40	105	1	1	9	6.08221912384033	81	663
880	1532	0	1	12	25	12	12	360396	1	0	0	0	0	1	0	0	0	0	0	0	0	0	1	0	1	500	0	42	98	6	1	7	6.21460819244385	49	663
881	1535	0	1	18	33	NA	18	346581	0	1	0	0	0	1	0	0	0	0	0	0	0	0	1	0	1	1264	0	47	122	1	1	9	7.14203643798828	81	663
882	1536	0	1	14	26	12	14	358554	1	0	0	0	0	1	0	0	0	0	0	0	0	0	1	1	1	747	0	43	104	1	1	6	6.61606502532959	36	663
883	1537	0	1	14	27	12	12	358554	1	0	0	0	0	1	0	0	0	0	0	0	0	0	1	0	1	513	0	29	78	1	1	7	6.24027585983276	49	663
884	1539	0	1	12	33	NA	NA	346581	0	1	0	0	0	1	0	0	0	0	0	0	0	0	1	1	1	700	0	43	104	1	NA	15	6.55108022689819	225	663
885	1541	0	1	16	29	14	12	468402	1	0	0	0	0	1	0	0	0	0	0	0	0	0	1	0	1	672	0	38	93	1	1	7	6.51025819778442	49	663
886	1542	0	1	17	30	NA	NA	468402	1	0	0	0	0	1	0	0	0	0	0	0	0	0	1	0	1	983	1	39	87	6	1	7	6.89060926437378	49	663
887	1543	0	1	13	29	12	12	538123	1	0	0	0	0	1	0	0	0	0	0	0	0	0	0	0	1	220	1	35	101	1	1	10	5.39362764358521	100	663
888	1544	0	1	18	33	12	12	358351	1	0	0	0	0	1	0	0	0	0	0	0	0	0	1	0	1	1202	0	39	134	1	1	9	7.09174203872681	81	663
889	1545	0	1	12	30	12	12	484311	1	0	0	0	0	1	0	0	0	0	0	0	0	0	0	0	1	667	0	39	85	1	1	12	6.50278997421265	144	663
890	1548	0	1	14	28	NA	NA	117131	0	0	0	0	0	1	0	0	0	0	0	0	0	1	1	0	1	838	0	41	NA	1	1	8	6.73101806640625	64	663
891	1551	0	1	15	25	12	12	360396	1	0	0	0	0	1	0	0	0	0	0	0	0	0	1	0	1	444	1	36	104	1	1	4	6.09582471847534	16	663
892	1554	0	1	12	25	10	12	360396	1	0	0	0	0	1	0	0	0	0	0	0	0	0	1	0	1	543	0	25	104	6	1	7	6.29710912704468	49	663
893	1555	0	1	14	30	12	12	484311	1	0	0	0	0	1	0	0	0	0	0	0	0	0	1	1	1	505	0	41	NA	1	1	10	6.22455835342407	100	663
894	1556	0	1	12	31	NA	NA	484311	0	0	1	0	0	1	0	0	0	0	0	0	0	0	0	0	1	797	0	37	107	1	1	13	6.68085479736328	169	663
895	1557	0	1	9	24	10	8	360396	1	0	0	0	0	1	0	0	0	0	0	0	0	0	1	0	1	357	0	18	NA	1	1	9	5.87773561477661	81	663
896	1558	0	1	12	27	12	8	370732	1	0	0	0	0	1	0	0	0	0	0	0	0	0	1	0	1	500	0	30	93	1	1	9	6.21460819244385	81	663
897	1559	0	1	12	34	NA	8	358351	0	1	0	0	0	1	0	0	0	0	0	0	0	0	1	0	1	962	0	47	NA	1	1	16	6.86901426315308	256	663
898	1560	0	1	11	28	6	5	370732	1	0	0	0	0	1	0	0	0	0	0	0	0	0	1	0	1	350	0	31	94	6	1	11	5.85793304443359	121	663
899	1561	0	1	15	24	6	5	360396	1	0	0	0	0	1	0	0	0	0	0	0	0	0	1	0	1	313	0	35	NA	6	1	3	5.74620342254639	9	663
900	1562	0	1	16	24	17	13	360396	1	0	0	0	0	1	0	0	0	0	0	0	0	0	1	1	1	117	1	34	NA	1	1	2	4.76217412948608	4	663
901	1563	0	1	12	33	10	8	358351	1	0	0	0	0	1	0	0	0	0	0	0	0	0	1	0	1	726	0	48	109	1	1	15	6.58755016326904	225	663
902	1564	0	1	13	33	NA	11	141996	1	0	0	0	0	1	0	0	0	0	0	0	0	1	1	0	1	536	0	31	119	1	0	14	6.28413438796997	196	663
903	1565	0	1	13	26	12	12	99110	1	0	0	0	0	1	0	0	0	0	0	0	0	1	1	1	1	532	0	29	98	1	1	7	6.2766432762146	49	663
904	1566	0	1	17	28	NA	NA	99110	0	0	0	0	0	1	0	0	0	0	0	0	0	1	1	1	1	428	1	32	103	1	1	5	6.05912303924561	25	663
905	1569	0	1	16	34	15	13	398168	1	0	0	0	0	1	0	0	0	0	0	0	0	0	1	0	1	1094	0	50	NA	1	1	12	6.99759578704834	144	663
906	1570	0	1	12	33	NA	9	358351	0	1	0	0	0	1	0	0	0	0	0	0	0	0	1	0	1	1925	0	45	NA	1	1	15	7.56268119812012	225	663
907	1571	0	1	18	32	10	12	398168	1	0	0	0	0	1	0	0	0	0	0	0	0	0	1	1	1	850	0	36	112	1	1	8	6.74523639678955	64	663
908	1574	0	1	12	24	11	11	360396	1	0	0	0	0	1	0	0	0	0	0	0	0	0	1	0	1	365	0	34	NA	6	1	6	5.89989757537842	36	663
909	1575	0	1	16	26	12	8	370732	1	0	0	0	0	1	0	0	0	0	0	0	0	0	1	0	1	474	0	29	104	6	1	4	6.16120719909668	16	663
910	1576	0	1	13	26	11	10	370732	1	0	0	0	0	1	0	0	0	0	0	0	0	0	1	0	1	656	0	33	96	1	0	7	6.48616075515747	49	663
911	1577	0	1	12	25	11	10	360396	1	0	0	0	0	1	0	0	0	0	0	0	0	0	1	0	1	440	0	22	NA	6	0	7	6.0867748260498	49	663
912	1578	0	1	14	25	10	11	360396	1	0	0	0	0	1	0	0	0	0	0	0	0	0	1	0	1	462	0	38	102	1	1	5	6.13556480407715	25	663
913	1579	0	0	16	28	9	NA	358554	0	0	1	0	0	1	0	0	0	0	0	0	0	0	1	0	1	673	0	41	103	1	1	6	6.51174545288086	36	663
914	1580	0	0	12	24	12	12	348558	1	0	0	0	0	1	0	0	0	0	0	0	0	0	1	0	1	1150	0	16	NA	1	1	6	7.0475172996521	36	663
915	1582	0	0	12	31	NA	NA	139912	0	0	0	0	0	1	0	0	0	0	0	0	0	0	1	0	1	800	0	37	95	4	0	13	6.68461179733276	169	663
916	1584	0	0	12	25	NA	12	88097	0	1	0	0	0	1	0	0	0	0	0	0	0	0	1	0	1	460	0	23	NA	6	1	7	6.13122653961182	49	663
917	1586	1	0	12	26	NA	NA	358554	0	0	0	0	0	1	0	0	0	0	0	0	0	0	1	0	1	334	0	31	93	1	1	8	5.81114101409912	64	663
918	1587	1	0	13	26	6	8	358554	1	0	0	0	0	1	0	0	0	0	0	0	0	0	1	0	1	702	0	35	122	1	1	7	6.55393362045288	49	663
919	1588	1	0	12	25	6	8	348558	1	0	0	0	0	1	0	0	0	0	0	0	0	0	1	0	1	524	0	37	107	4	1	7	6.2614917755127	49	663
920	1591	0	1	7	33	NA	8	398168	0	0	1	0	0	0	1	0	0	0	0	0	0	0	0	0	1	667	0	37	NA	1	1	20	6.50278997421265	400	664
921	1594	0	1	18	26	12	12	370732	1	0	0	0	0	1	0	0	0	0	0	0	0	0	1	0	1	641	0	48	NA	1	1	2	6.46302938461304	4	663
922	1595	0	1	12	24	12	12	360396	1	0	0	0	0	1	0	0	0	0	0	0	0	0	1	0	1	800	0	40	NA	1	1	6	6.68461179733276	36	663
923	1597	1	1	12	32	NA	12	398168	1	0	0	0	0	1	0	0	0	0	0	0	0	0	1	0	1	577	0	30	97	1	0	14	6.35784244537354	196	663
924	1599	1	1	18	32	12	12	87597	1	0	0	0	0	1	0	0	0	0	0	0	0	0	0	0	1	423	0	41	115	1	1	8	6.04737234115601	64	663
925	1600	1	1	18	29	NA	NA	118387	0	0	0	0	0	1	0	0	0	0	0	0	0	0	1	0	1	874	0	42	120	1	1	5	6.77308034896851	25	663
926	1601	1	1	15	28	NA	12	90623	0	1	0	0	0	1	0	0	0	0	0	0	0	0	1	0	1	640	0	29	103	1	0	7	6.46146821975708	49	663
927	1604	0	0	16	29	12	14	484311	1	0	0	0	0	0	1	0	0	0	0	0	0	0	1	1	1	1101	0	41	106	1	1	7	7.00397396087646	49	664
928	1605	0	0	16	26	12	14	370732	1	0	0	0	0	0	1	0	0	0	0	0	0	0	1	0	1	649	0	32	96	1	1	4	6.47543287277222	16	664
929	1606	0	0	12	26	8	8	370732	1	0	0	0	0	0	1	0	0	0	0	0	0	0	1	1	1	450	0	39	114	1	1	8	6.10924768447876	64	664
930	1607	0	0	12	33	NA	9	358351	1	0	0	0	0	0	1	0	0	0	0	0	0	0	1	0	1	924	0	37	NA	4	1	15	6.82871198654175	225	664
931	1608	0	0	11	27	NA	9	370732	0	1	0	0	0	0	1	0	0	0	0	0	0	0	1	0	1	698	0	33	86	1	1	10	6.54821920394897	100	664
932	1609	0	0	15	34	NA	NA	580891	1	0	0	0	0	0	1	0	0	0	0	0	0	1	1	0	1	505	1	27	78	1	1	13	6.22455835342407	169	664
933	1610	0	0	16	28	12	13	370732	1	0	0	0	0	0	1	0	0	0	0	0	0	0	1	1	1	556	0	38	110	1	1	6	6.32076835632324	36	664
934	1611	0	0	17	25	12	13	360396	1	0	0	0	0	0	1	0	0	0	0	0	0	0	0	0	1	375	1	37	132	6	1	2	5.92692613601685	4	664
935	1612	0	0	15	28	12	12	370732	1	0	0	0	0	0	1	0	0	0	0	0	0	0	1	1	1	673	0	34	126	1	1	7	6.51174545288086	49	664
936	1613	0	0	13	30	8	8	484311	1	0	0	0	0	0	1	0	0	0	0	0	0	0	1	0	1	308	0	36	102	1	1	11	5.73009967803955	121	664
937	1614	0	0	12	34	12	12	346581	1	0	0	0	0	0	1	0	0	0	0	0	0	0	1	0	1	585	0	41	87	1	1	16	6.37161207199097	256	664
938	1615	0	0	12	24	12	13	387287	1	0	0	0	0	0	1	0	0	0	0	0	0	0	1	0	1	781	0	31	89	4	1	6	6.6605749130249	36	664
939	1620	0	1	12	27	NA	8	364640	0	1	0	0	0	1	0	0	0	0	0	0	0	0	1	0	1	656	0	40	106	1	1	9	6.48616075515747	81	663
940	1621	0	1	12	28	8	5	405155	1	0	0	0	0	1	0	0	0	0	0	0	0	0	1	0	1	423	0	43	100	1	1	10	6.04737234115601	100	663
941	1624	0	1	16	28	12	12	364640	1	0	0	0	0	1	0	0	0	0	0	0	0	0	1	0	1	1282	0	26	98	1	1	6	7.15617656707764	36	663
942	1627	0	1	12	25	11	12	354474	0	0	1	0	0	1	0	0	0	0	0	0	0	0	1	0	1	962	0	30	97	1	1	7	6.86901426315308	49	663
943	1628	0	1	12	30	4	16	476353	1	0	0	0	0	1	0	0	0	0	0	0	0	0	1	0	1	800	0	38	111	1	1	12	6.68461179733276	144	663
944	1630	0	1	12	33	12	12	352463	1	0	0	0	0	1	0	0	0	0	0	0	0	0	1	0	1	750	0	40	100	1	1	15	6.62007331848145	225	663
945	1631	0	1	18	29	12	12	476353	1	0	0	0	0	1	0	0	0	0	0	0	0	0	1	0	1	647	0	39	110	4	1	5	6.47234630584717	25	663
946	1632	0	1	12	29	10	12	476353	1	0	0	0	0	1	0	0	0	0	0	0	0	0	1	0	1	938	0	38	114	4	1	11	6.84375	121	663
947	1633	0	1	17	28	17	12	414980	1	0	0	0	0	1	0	0	0	0	0	0	0	0	1	0	0	537	1	43	135	4	1	5	6.28599786758423	25	663
948	1637	0	1	15	24	13	16	354474	1	0	0	0	0	1	0	0	0	0	0	0	0	0	1	0	1	290	1	39	121	6	1	3	5.66988086700439	9	663
949	1638	0	1	12	29	6	8	529281	1	0	0	0	0	0	0	1	0	0	0	0	1	0	0	1	0	192	0	33	95	1	0	11	5.25749540328979	121	665
950	1639	0	1	18	30	NA	NA	476353	0	0	1	0	0	1	0	0	0	0	0	0	0	0	1	0	1	818	0	35	116	1	1	6	6.706862449646	36	663
951	1640	0	1	18	30	NA	13	476353	0	0	1	0	0	1	0	0	0	0	0	0	0	0	1	0	1	813	0	45	98	1	1	6	6.70073127746582	36	663
952	1641	0	1	12	29	10	12	476353	1	0	0	0	0	1	0	0	0	0	0	0	0	0	1	0	1	727	0	28	90	1	1	11	6.58892631530762	121	663
953	1643	0	1	12	24	10	12	363070	1	0	0	0	0	1	0	0	0	0	0	0	0	0	1	0	1	1125	0	33	116	1	1	6	7.02553844451904	36	663
954	1645	0	1	17	28	14	NA	89240	0	0	0	0	0	1	0	0	0	0	0	0	0	1	1	0	1	615	1	32	110	1	1	5	6.42162227630615	25	663
955	1646	0	1	12	26	14	NA	89240	0	0	0	0	0	1	0	0	0	0	0	0	0	1	1	0	1	403	0	23	97	6	0	8	5.99893665313721	64	663
956	1647	0	1	11	26	8	9	89134	1	0	0	0	0	1	0	0	0	0	0	0	0	0	1	0	1	705	0	24	89	1	1	9	6.55819797515869	81	663
957	1648	0	1	15	27	11	12	89134	1	0	0	0	0	1	0	0	0	0	0	0	0	0	1	0	1	337	1	33	105	1	1	6	5.8200831413269	36	663
958	1649	0	1	17	28	11	12	373482	1	0	0	0	0	1	0	0	0	0	0	0	0	0	1	0	1	833	0	44	117	1	0	5	6.7250337600708	25	663
959	1650	0	1	17	26	11	12	373482	1	0	0	0	0	1	0	0	0	0	0	0	0	0	1	0	1	192	1	37	75	1	1	3	5.25749540328979	9	663
960	1653	0	1	12	26	12	12	373482	1	0	0	0	0	1	0	0	0	0	0	0	0	0	1	0	1	730	0	23	87	1	0	8	6.59304475784302	64	663
961	1654	0	1	10	26	9	11	373482	1	0	0	0	0	1	0	0	0	0	0	0	0	0	1	0	1	542	0	23	74	1	1	10	6.29526615142822	100	663
962	1655	0	1	12	28	11	11	364640	1	0	0	0	0	1	0	0	0	0	0	0	0	0	0	0	0	823	0	45	91	1	1	10	6.71295642852783	100	663
963	1656	0	1	12	26	11	11	364640	1	0	0	0	0	1	0	0	0	0	0	0	0	0	1	1	0	438	0	38	90	1	1	8	6.08221912384033	64	663
964	1657	0	1	14	24	11	11	354474	1	0	0	0	0	1	0	0	0	0	0	0	0	0	1	1	0	735	0	27	NA	1	1	4	6.5998706817627	16	663
965	1658	0	1	16	24	14	12	354474	1	0	0	0	0	1	0	0	0	0	0	0	0	0	1	0	0	427	0	31	112	6	1	2	6.05678415298462	4	663
966	1660	0	1	12	30	11	12	116442	1	0	0	0	0	1	0	0	0	0	0	0	0	0	0	0	0	340	0	38	90	1	1	12	5.82894563674927	144	663
967	1665	0	1	13	34	14	11	401122	1	0	0	0	0	1	0	0	0	0	0	0	0	0	1	1	0	481	0	29	130	1	1	15	6.17586708068848	225	663
968	1666	0	1	16	32	10	12	352463	1	0	0	0	0	1	0	0	0	0	0	0	0	0	1	0	0	817	0	51	108	1	1	10	6.70563888549805	100	663
969	1667	0	1	12	28	12	12	373482	1	0	0	0	0	1	0	0	0	0	0	0	0	0	0	0	0	500	0	34	86	1	1	10	6.21460819244385	100	663
970	1669	0	1	12	25	NA	NA	87052	0	0	0	0	0	1	0	0	0	0	0	0	0	1	1	0	0	543	0	30	101	1	0	7	6.29710912704468	49	663
971	1671	0	1	16	26	NA	11	373482	0	1	0	0	0	1	0	0	0	0	0	0	0	0	1	0	0	447	0	37	125	1	0	4	6.10255861282349	16	663
972	1675	0	1	15	25	NA	11	403411	0	0	1	0	0	1	0	0	0	0	0	0	0	0	0	0	0	217	0	24	94	1	1	4	5.37989711761475	16	663
973	1677	0	1	8	26	3	6	91296	0	0	1	0	0	1	0	0	0	0	0	0	0	0	1	0	1	275	0	18	NA	1	0	12	5.61677122116089	144	663
974	1678	0	1	15	24	8	10	79842	1	0	0	0	0	1	0	0	0	0	0	0	0	1	1	0	1	352	1	22	109	5	0	3	5.86363124847412	9	663
975	1681	0	1	12	29	8	10	140950	1	0	0	0	0	1	0	0	0	0	0	0	0	0	0	0	0	721	0	31	98	1	0	11	6.58063936233521	121	663
976	1682	0	1	12	27	3	8	91296	1	0	0	0	0	1	0	0	0	0	0	0	0	0	0	0	0	1008	0	36	NA	1	1	9	6.91572332382202	81	663
977	1684	0	1	17	29	8	12	487904	1	0	0	0	0	1	0	0	0	0	0	0	0	0	1	0	0	654	1	36	114	1	0	6	6.4831075668335	36	663
978	1685	0	1	16	26	NA	16	347666	1	0	0	0	0	1	0	0	0	0	0	0	0	0	1	0	1	803	0	27	125	1	1	4	6.6883544921875	16	663
979	1686	0	1	12	27	8	12	370732	1	0	0	0	0	1	0	0	0	0	0	0	0	0	1	0	1	570	0	28	100	1	1	9	6.34563636779785	81	663
980	1688	0	1	16	25	12	12	360396	1	0	0	0	0	1	0	0	0	0	0	0	0	0	1	0	1	600	0	29	104	1	1	3	6.39692974090576	9	663
981	1691	0	1	12	24	NA	NA	348558	0	0	1	0	0	1	0	0	0	0	0	0	0	0	1	0	1	645	0	35	NA	1	1	6	6.46925020217896	36	663
982	1692	0	1	13	26	14	10	358554	1	0	0	0	0	1	0	0	0	0	0	0	0	0	1	0	1	450	0	35	112	1	1	7	6.10924768447876	49	663
983	1694	0	1	13	26	NA	2	358554	1	0	0	0	0	1	0	0	0	0	0	0	0	0	1	1	1	445	0	27	100	6	0	7	6.09807443618774	49	663
984	1696	0	1	15	29	12	11	484311	1	0	0	0	0	1	0	0	0	0	0	0	0	0	0	0	1	590	0	37	104	1	1	8	6.38012266159058	64	663
985	1697	0	1	14	25	8	12	348558	1	0	0	0	0	1	0	0	0	0	0	0	0	0	1	0	1	721	0	35	97	1	1	5	6.58063936233521	25	663
986	1698	0	1	12	32	8	8	352463	1	0	0	0	0	1	0	0	0	0	0	0	0	0	1	0	1	693	0	33	120	1	1	14	6.54102993011475	196	663
987	1699	0	1	13	26	8	8	364640	1	0	0	0	0	1	0	0	0	0	0	0	0	0	1	1	1	529	0	38	134	6	1	7	6.27098846435547	49	663
988	1700	0	1	9	30	8	8	476353	1	0	0	0	0	1	0	0	0	0	0	0	0	0	1	0	1	470	0	28	92	1	0	15	6.15273284912109	225	663
989	1701	0	1	16	26	16	13	364640	1	0	0	0	0	1	0	0	0	0	0	0	0	0	1	0	1	481	0	34	129	1	1	4	6.17586708068848	16	663
990	1702	0	1	16	25	16	13	354474	1	0	0	0	0	1	0	0	0	0	0	0	0	0	1	0	1	462	0	31	122	1	1	3	6.13556480407715	9	663
991	1703	0	1	17	33	6	9	391625	1	0	0	0	0	1	0	0	0	0	0	0	0	0	1	0	1	554	1	45	NA	1	1	10	6.3171648979187	100	663
992	1704	0	1	14	32	12	12	352463	1	0	0	0	0	1	0	0	0	0	0	0	0	0	1	0	0	865	0	42	118	4	0	12	6.76272964477539	144	663
993	1705	0	1	16	30	NA	12	476353	0	1	0	0	0	1	0	0	0	0	0	0	0	0	0	0	0	713	0	42	101	1	1	8	6.56948137283325	64	663
994	1706	0	1	12	24	NA	12	354474	0	1	0	0	0	1	0	0	0	0	0	0	0	0	0	0	0	740	0	37	107	1	1	6	6.60665035247803	36	663
995	1707	0	1	14	28	NA	10	364640	0	0	1	0	0	1	0	0	0	0	0	0	0	0	1	0	0	817	0	NA	92	4	1	8	6.70563888549805	64	663
996	1708	0	1	12	34	11	12	361010	1	0	0	0	0	1	0	0	0	0	0	0	0	0	1	0	1	677	0	37	92	1	1	16	6.51767110824585	256	663
997	1710	0	1	16	29	12	12	454179	1	0	0	0	0	1	0	0	0	0	0	0	0	0	1	0	1	797	1	43	121	1	1	7	6.68085479736328	49	663
998	1711	0	1	13	24	13	17	337974	1	0	0	0	0	1	0	0	0	0	0	0	0	0	1	0	1	769	1	27	102	1	1	5	6.64509105682373	25	663
999	1713	0	1	16	25	12	16	337974	1	0	0	0	0	1	0	0	0	0	0	0	0	0	1	0	1	462	0	33	118	1	1	3	6.13556480407715	9	663
1000	1714	0	1	14	24	12	12	363070	1	0	0	0	0	1	0	0	0	0	0	0	0	0	1	0	0	519	0	28	NA	1	1	4	6.25190401077271	16	663
1001	1715	0	1	12	25	12	NA	363070	1	0	0	0	0	1	0	0	0	0	0	0	0	0	0	0	0	393	0	38	100	1	1	7	5.97380971908569	49	663
1002	1716	0	1	13	32	9	7	361010	1	0	0	0	0	1	0	0	0	0	0	0	0	0	1	1	0	800	0	37	92	1	1	13	6.68461179733276	169	663
1003	1717	1	0	17	27	14	12	373482	1	0	0	0	0	1	0	0	0	0	0	0	0	0	1	0	0	673	0	38	108	1	1	4	6.51174545288086	16	663
1004	1718	1	0	16	33	NA	NA	401122	1	0	0	0	0	1	0	0	0	0	0	0	0	0	0	0	0	481	1	41	121	1	1	11	6.17586708068848	121	663
1005	1719	1	0	12	32	8	12	401122	1	0	0	0	0	1	0	0	0	0	0	0	0	0	0	0	0	911	0	42	119	1	1	14	6.81454277038574	196	663
1006	1720	1	0	12	25	8	8	363070	1	0	0	0	0	1	0	0	0	0	0	0	0	0	0	0	0	481	0	33	NA	1	0	7	6.17586708068848	49	663
1007	1721	1	0	11	33	8	8	361010	1	0	0	0	0	1	0	0	0	0	0	0	0	0	0	0	0	500	0	32	NA	1	0	16	6.21460819244385	256	663
1008	1724	1	0	16	24	12	12	337974	1	0	0	0	0	1	0	0	0	0	0	0	0	0	0	0	0	385	0	39	106	1	1	2	5.95324325561523	4	663
1009	1725	1	0	12	24	12	11	337974	1	0	0	0	0	1	0	0	0	0	0	0	0	0	1	0	0	436	0	24	98	1	0	6	6.0776424407959	36	663
1010	1729	1	0	12	25	7	8	337974	1	0	0	0	0	1	0	0	0	0	0	0	0	0	0	0	0	526	0	29	109	1	0	7	6.26530122756958	49	663
1011	1730	1	0	14	29	12	8	454179	1	0	0	0	0	1	0	0	0	0	0	0	0	0	0	0	0	913	0	37	NA	6	0	9	6.81673574447632	81	663
1012	1731	1	0	16	25	12	15	337974	1	0	0	0	0	1	0	0	0	0	0	0	0	0	0	0	0	542	0	28	120	6	0	3	6.29526615142822	9	663
1013	1732	1	0	13	28	4	16	347666	1	0	0	0	0	1	0	0	0	0	0	0	0	0	0	0	0	769	0	36	127	1	1	9	6.64509105682373	81	663
1014	1735	1	0	12	24	8	8	337974	1	0	0	0	0	1	0	0	0	0	0	0	0	0	0	0	0	226	0	26	NA	6	0	6	5.42053508758545	36	663
1015	1736	1	0	18	27	12	12	373482	1	0	0	0	0	1	0	0	0	0	0	0	0	0	0	0	1	711	0	24	101	1	1	3	6.56667232513428	9	663
1016	1740	0	0	18	34	8	8	352463	1	0	0	0	0	0	1	0	0	0	0	0	0	0	0	0	0	346	0	43	108	1	0	10	5.84643888473511	100	664
1017	1741	0	0	12	32	8	8	352463	1	0	0	0	0	0	1	0	0	0	0	0	0	0	0	0	0	787	0	41	91	1	1	14	6.66822814941406	196	664
1018	1742	0	0	14	26	10	12	364640	0	0	1	0	0	0	1	0	0	0	0	0	0	0	1	0	0	455	0	38	118	1	1	6	6.1202974319458	36	664
1019	1743	0	0	16	24	10	12	354474	0	0	1	0	0	0	1	0	0	0	0	0	0	0	1	0	0	460	0	25	110	6	1	2	6.13122653961182	4	664
1020	1744	0	0	13	26	NA	14	364640	0	1	0	0	0	0	1	0	0	0	0	0	0	0	0	0	0	277	0	37	119	1	1	7	5.6240177154541	49	664
1021	1745	0	0	17	34	8	12	391625	1	0	0	0	0	0	1	0	0	0	0	0	0	0	1	0	0	808	0	43	103	1	1	11	6.69456195831299	121	664
1022	1746	0	0	14	27	12	14	347666	1	0	0	0	0	0	1	0	0	0	0	0	0	0	0	0	0	624	0	33	103	1	1	7	6.43615055084229	49	664
1023	1747	0	0	12	26	8	12	347666	1	0	0	0	0	0	1	0	0	0	0	0	0	0	1	0	0	697	0	40	104	1	1	8	6.54678535461426	64	664
1024	1748	0	0	14	26	8	12	347666	1	0	0	0	0	0	1	0	0	0	0	0	0	0	0	0	0	378	0	32	108	1	1	6	5.93489408493042	36	664
1025	1750	0	0	12	24	8	12	337974	1	0	0	0	0	0	1	0	0	0	0	0	0	0	0	0	0	473	0	33	118	1	0	6	6.159095287323	36	664
1026	1751	0	0	12	24	8	12	337974	1	0	0	0	0	0	1	0	0	0	0	0	0	0	0	0	0	425	0	21	98	1	0	6	6.05208921432495	36	664
1027	1753	0	0	16	24	8	12	337974	1	0	0	0	0	0	1	0	0	0	0	0	0	0	0	0	0	649	0	25	120	1	1	2	6.47543287277222	4	664
1028	1755	0	0	15	25	12	15	354474	1	0	0	0	0	1	0	0	0	0	0	0	0	0	1	0	1	491	0	25	144	1	1	4	6.19644403457642	16	663
1029	1756	0	0	18	26	12	16	364640	0	0	1	0	0	1	0	0	0	0	0	0	0	0	0	0	0	924	0	25	NA	4	1	2	6.82871198654175	4	663
1030	1758	0	0	12	24	12	10	354474	1	0	0	0	0	1	0	0	0	0	0	0	0	0	0	0	0	350	0	38	NA	1	0	6	5.85793304443359	36	663
1031	1759	0	0	13	25	13	12	337974	1	0	0	0	0	1	0	0	0	0	0	0	0	0	0	0	0	600	0	27	NA	1	0	6	6.39692974090576	36	663
1032	1762	0	0	9	31	3	7	487904	1	0	0	0	0	1	0	0	0	0	0	0	0	0	0	0	0	429	0	30	NA	1	0	16	6.06145715713501	256	663
1033	1765	0	0	12	26	2	7	373482	1	0	0	0	0	1	0	0	0	0	0	0	0	0	0	0	0	500	0	20	100	1	0	8	6.21460819244385	64	663
1034	1766	0	0	9	24	2	7	363070	1	0	0	0	0	1	0	0	0	0	0	0	0	0	0	0	0	500	0	12	NA	6	0	9	6.21460819244385	81	663
1035	1767	0	0	8	34	8	8	361010	1	0	0	0	0	0	1	0	0	0	0	0	0	0	0	0	0	350	0	39	NA	1	0	20	5.85793304443359	400	664
1036	1768	0	0	14	27	8	10	414980	1	0	0	0	0	0	1	0	0	0	0	0	0	0	0	0	0	370	0	32	86	1	1	7	5.91350317001343	49	664
1037	1771	0	0	16	24	8	12	337974	1	0	0	0	0	0	1	0	0	0	0	0	0	0	0	0	0	380	0	21	NA	1	1	2	5.94017124176025	4	664
1038	1772	0	0	14	25	9	12	337974	1	0	0	0	0	0	1	0	0	0	0	0	0	0	0	0	0	250	0	30	NA	1	1	5	5.52146100997925	25	664
1039	1774	0	0	18	30	6	8	454179	1	0	0	0	0	0	1	0	0	0	0	0	0	0	1	0	1	506	0	40	122	1	1	6	6.22653675079346	36	664
1040	1776	0	0	12	27	12	13	347666	1	0	0	0	0	0	1	0	0	0	0	0	0	0	1	0	0	619	1	35	98	1	1	9	6.42810535430908	81	664
1041	1777	0	0	16	24	12	13	337974	1	0	0	0	0	0	1	0	0	0	0	0	0	0	0	0	0	381	1	28	NA	1	1	2	5.94279956817627	4	664
1042	1779	0	0	12	30	NA	13	476353	1	0	0	0	0	0	1	0	0	0	0	0	0	0	0	0	0	361	0	37	101	1	1	12	5.88887786865234	144	664
1043	1780	0	0	12	28	NA	8	364640	0	1	0	0	0	0	1	0	0	0	0	0	0	0	1	0	0	588	0	33	117	1	1	10	6.37672710418701	100	664
1044	1781	0	0	12	24	NA	8	354474	0	1	0	0	0	0	1	0	0	0	0	0	0	0	1	0	0	350	0	35	119	1	1	6	5.85793304443359	36	664
1045	1784	0	0	12	32	8	12	336056	1	0	0	0	0	0	1	0	0	0	0	0	0	0	1	0	1	484	0	37	105	1	1	14	6.18208503723145	196	664
1046	1785	0	0	11	34	6	9	336056	1	0	0	0	0	0	1	0	0	0	0	0	0	0	0	0	0	835	0	37	104	1	0	17	6.7274317741394	289	664
1047	1786	0	0	10	29	8	12	454179	1	0	0	0	0	0	1	0	0	0	0	0	0	0	1	0	0	535	0	22	NA	1	1	13	6.28226661682129	169	664
1048	1789	0	1	17	28	NA	12	373482	0	0	0	0	0	0	1	0	0	0	0	0	0	0	0	0	0	385	0	46	111	6	1	5	5.95324325561523	25	664
1049	1790	0	1	11	25	8	8	363070	1	0	0	0	0	0	1	0	0	0	0	0	0	0	0	0	0	450	0	22	96	4	1	8	6.10924768447876	64	664
1050	1791	0	1	16	28	12	8	373482	1	0	0	0	0	0	1	0	0	0	0	0	0	0	0	0	0	491	0	29	94	1	1	6	6.19644403457642	36	664
1051	1792	0	1	12	24	NA	10	363070	0	1	0	0	0	0	1	0	0	0	0	0	0	0	0	0	0	914	0	41	NA	1	1	6	6.81783056259155	36	664
1052	1794	0	1	18	32	8	12	86158	1	0	0	0	0	0	1	0	0	0	0	0	0	0	1	0	0	831	0	36	101	1	0	8	6.7226300239563	64	664
1053	1795	0	1	12	30	8	8	454179	1	0	0	0	0	0	1	0	0	0	0	0	0	0	0	0	0	434	0	36	83	1	1	12	6.07304430007935	144	664
1054	1796	0	1	12	26	8	8	347666	1	0	0	0	0	0	1	0	0	0	0	0	0	0	0	0	0	700	0	34	112	1	1	8	6.55108022689819	64	664
1055	1797	0	1	10	26	8	8	347666	1	0	0	0	0	0	1	0	0	0	0	0	0	0	0	0	0	542	0	28	93	1	0	10	6.29526615142822	100	664
1056	1799	0	1	16	24	12	13	337974	1	0	0	0	0	0	1	0	0	0	0	0	0	0	0	0	0	231	0	27	NA	6	1	2	5.44241762161255	4	664
1057	1802	0	0	12	34	12	9	352463	1	0	0	0	0	0	1	0	0	0	0	0	0	0	0	0	0	395	0	42	105	1	0	16	5.97888565063477	256	664
1058	1803	0	0	12	25	NA	NA	363070	0	0	0	0	0	0	1	0	0	0	0	0	0	0	1	0	0	721	0	37	115	1	1	7	6.58063936233521	49	664
1059	1804	0	0	12	25	8	15	363070	1	0	0	0	0	0	1	0	0	0	0	0	0	0	0	0	0	1187	0	24	105	4	0	7	7.07918453216553	49	664
1060	1809	0	0	12	25	8	10	363070	1	0	0	0	0	0	1	0	0	0	0	0	0	0	1	0	0	501	0	27	88	1	0	7	6.21660614013672	49	664
1061	1810	0	1	16	24	16	13	337974	1	0	0	0	0	0	1	0	0	0	0	0	0	0	1	0	0	336	0	39	122	6	1	2	5.81711101531982	4	664
1062	1812	0	1	12	32	8	8	336056	1	0	0	0	0	0	1	0	0	0	0	0	0	0	0	0	0	565	0	43	96	1	0	14	6.33682584762573	196	664
1063	1814	0	0	17	34	6	12	704926	1	0	0	0	0	1	0	0	0	0	0	0	0	0	0	1	1	964	0	42	123	1	0	11	6.87109136581421	121	663
1064	1816	0	0	12	33	12	12	722020	1	0	0	0	0	1	0	0	0	0	0	0	0	0	1	0	1	1374	0	45	NA	1	1	15	7.22548151016235	225	663
1065	1817	0	0	12	28	12	12	373482	1	0	0	0	0	1	0	0	0	0	0	0	0	0	1	0	1	800	0	31	104	1	1	10	6.68461179733276	100	663
1066	1819	0	0	12	30	7	11	487904	1	0	0	0	0	1	0	0	0	0	0	0	0	0	1	0	1	609	0	43	108	1	1	12	6.4118185043335	144	663
1067	1821	0	0	16	25	12	12	363070	1	0	0	0	0	1	0	0	0	0	0	0	0	0	1	0	1	670	0	35	116	1	1	3	6.5072774887085	9	663
1068	1822	0	0	11	25	8	7	363070	1	0	0	0	0	1	0	0	0	0	0	0	0	0	1	0	1	445	0	26	92	1	1	8	6.09807443618774	64	663
1069	1826	0	0	13	25	10	12	363070	1	0	0	0	0	1	0	0	0	0	0	0	0	0	1	0	1	485	0	32	102	1	1	6	6.18414878845215	36	663
1070	1830	0	0	18	32	12	16	373396	1	0	0	0	0	1	0	0	0	0	0	0	0	0	0	0	0	710	0	45	109	1	1	8	6.56526517868042	64	663
1071	1831	0	0	12	32	NA	NA	373396	0	0	0	0	0	1	0	0	0	0	0	0	0	0	0	0	0	953	0	43	103	1	1	14	6.85961484909058	196	663
1072	1832	0	0	11	25	10	8	363070	1	0	0	0	0	1	0	0	0	0	0	0	0	0	0	0	0	480	0	22	NA	1	1	8	6.17378616333008	64	663
1073	1834	0	0	13	27	12	12	373482	1	0	0	0	0	1	0	0	0	0	0	0	0	0	1	0	1	500	0	39	97	1	1	8	6.21460819244385	64	663
1074	1835	0	0	16	26	12	12	373482	1	0	0	0	0	1	0	0	0	0	0	0	0	0	1	1	0	457	1	42	101	6	1	4	6.12468338012695	16	663
1075	1838	0	1	18	24	18	12	354474	1	0	0	0	0	0	1	0	0	0	0	0	0	0	0	0	0	721	0	39	NA	1	1	0	6.58063936233521	0	664
1076	1839	0	1	12	24	NA	12	354474	0	1	0	0	0	0	1	0	0	0	0	0	0	0	0	0	0	733	0	41	NA	1	1	6	6.59714555740356	36	664
1077	1843	0	1	12	33	8	12	391625	1	0	0	0	0	0	1	0	0	0	0	0	0	0	0	0	0	330	0	31	NA	1	0	15	5.7990927696228	225	664
1078	1844	0	1	12	27	8	11	364640	1	0	0	0	0	0	1	0	0	0	0	0	0	0	0	0	0	410	0	40	98	1	1	9	6.01615715026855	81	664
1079	1845	0	1	12	27	8	8	347666	1	0	0	0	0	0	1	0	0	0	0	0	0	0	0	0	0	486	0	23	96	1	1	9	6.18620872497559	81	664
1080	1847	0	1	18	31	9	13	454179	1	0	0	0	0	0	1	0	0	0	0	0	0	0	1	1	0	962	0	46	122	1	0	7	6.86901426315308	49	664
1081	1849	0	1	16	24	12	12	337974	1	0	0	0	0	0	1	0	0	0	0	0	0	0	0	0	0	359	0	29	114	1	0	2	5.88332223892212	4	664
1082	1853	1	0	12	24	9	12	393859	1	0	0	0	0	1	0	0	0	0	0	0	0	0	0	0	0	330	0	37	100	6	1	6	5.7990927696228	36	663
1083	1854	1	0	12	28	NA	10	364640	0	0	1	0	0	1	0	0	0	0	0	0	0	0	0	0	0	625	0	38	104	1	1	10	6.43775177001953	100	663
1084	1857	1	0	12	26	5	8	364640	1	0	0	0	0	1	0	0	0	0	0	0	0	0	0	0	0	495	0	35	111	1	1	8	6.2045578956604	64	663
1085	1858	1	0	12	29	12	12	476353	0	0	1	0	0	1	0	0	0	0	0	0	0	0	0	0	0	653	0	44	110	1	1	11	6.48157691955566	121	663
1086	1859	1	0	12	27	15	12	364640	1	0	0	0	0	1	0	0	0	0	0	0	0	0	0	0	0	722	0	26	87	1	1	9	6.58202505111694	81	663
1087	1860	1	0	12	25	15	12	354474	1	0	0	0	0	1	0	0	0	0	0	0	0	0	0	0	0	704	0	34	103	1	1	7	6.55677843093872	49	663
1088	1861	1	0	9	29	1	3	529281	1	0	0	0	0	1	0	0	0	0	0	0	0	0	0	0	0	514	0	31	NA	1	0	14	6.24222326278687	196	663
1089	1863	1	0	12	31	14	12	476353	1	0	0	0	0	1	0	0	0	0	0	0	0	0	1	0	0	625	0	27	95	4	1	13	6.43775177001953	169	663
1090	1864	1	0	18	29	12	15	476353	1	0	0	0	0	1	0	0	0	0	0	0	0	0	0	0	0	622	0	41	116	6	1	5	6.4329400062561	25	663
1091	1865	1	0	15	26	12	15	364640	1	0	0	0	0	1	0	0	0	0	0	0	0	0	1	0	0	427	0	31	109	1	1	5	6.05678415298462	25	663
1092	1867	1	0	12	29	12	12	487904	1	0	0	0	0	1	0	0	0	0	0	0	0	0	0	0	0	653	0	36	104	1	0	11	6.48157691955566	121	663
1093	1868	1	0	12	30	12	12	542115	1	0	0	0	0	1	0	0	0	0	0	0	0	0	0	0	0	643	0	38	104	1	0	12	6.46614456176758	144	663
1094	1869	1	0	12	34	12	12	336056	1	0	0	0	0	1	0	0	0	0	0	0	0	0	1	0	0	575	0	37	110	1	0	16	6.3543701171875	256	663
1095	1871	1	0	13	34	NA	NA	361010	0	0	1	0	0	1	0	0	0	0	0	0	0	0	0	1	0	313	1	32	100	1	1	15	5.74620342254639	225	663
1096	1872	1	0	18	24	NA	16	363070	0	1	0	0	0	1	0	0	0	0	0	0	0	0	0	0	0	664	0	39	116	1	1	0	6.49828195571899	0	663
1097	1873	1	0	13	32	8	13	361010	1	0	0	0	0	1	0	0	0	0	0	0	0	0	0	0	0	555	0	40	94	6	1	13	6.31896829605103	169	663
1098	1875	1	0	18	24	12	12	363070	1	0	0	0	0	1	0	0	0	0	0	0	0	0	1	0	0	300	0	44	NA	6	1	0	5.70378255844116	0	663
1099	1878	0	0	15	28	12	16	729279	1	0	0	0	0	1	0	0	0	0	0	0	0	0	0	0	0	642	0	38	115	1	1	7	6.4645881652832	49	663
1100	1880	0	0	14	28	12	8	364640	1	0	0	0	0	1	0	0	0	0	0	0	0	0	1	0	1	667	0	45	123	1	1	8	6.50278997421265	64	663
1101	1882	0	0	18	28	15	13	364640	1	0	0	0	0	1	0	0	0	0	0	0	0	0	1	0	1	1320	0	47	113	1	1	4	7.185387134552	16	663
1102	1883	0	0	12	24	9	9	363070	0	0	1	0	0	1	0	0	0	0	0	0	0	0	1	0	1	504	0	29	NA	1	1	6	6.22257614135742	36	663
1103	1884	0	0	16	25	12	12	337974	1	0	0	0	0	1	0	0	0	0	0	0	0	0	1	0	1	781	0	29	106	1	1	3	6.6605749130249	9	663
1104	1886	0	0	14	25	12	12	337974	1	0	0	0	0	1	0	0	0	0	0	0	0	0	1	0	0	817	0	40	114	4	0	5	6.70563888549805	25	663
1105	1889	0	0	12	28	12	6	364640	1	0	0	0	0	1	0	0	0	0	0	0	0	0	0	0	0	520	0	32	95	6	1	10	6.25382900238037	100	663
1106	1890	0	0	12	27	12	6	364640	1	0	0	0	0	1	0	0	0	0	0	0	0	0	0	0	0	577	0	33	113	1	1	9	6.35784244537354	81	663
1107	1891	0	0	11	25	12	6	354474	1	0	0	0	0	1	0	0	0	0	0	0	0	0	0	0	0	375	0	16	NA	1	1	8	5.92692613601685	64	663
1108	1892	0	0	12	24	12	8	354474	1	0	0	0	0	1	0	0	0	0	0	0	0	0	0	0	0	500	0	32	NA	1	0	6	6.21460819244385	36	663
1109	1893	0	0	16	28	12	12	364640	1	0	0	0	0	1	0	0	0	0	0	0	0	0	1	0	0	625	0	48	111	6	1	6	6.43775177001953	36	663
1110	1894	0	0	16	34	NA	NA	352463	1	0	0	0	0	1	0	0	0	0	0	0	0	0	0	0	0	684	0	35	110	1	1	12	6.52795791625977	144	663
1111	1895	0	0	14	26	12	12	364640	1	0	0	0	0	1	0	0	0	0	0	0	0	0	0	0	0	470	0	31	100	1	1	6	6.15273284912109	36	663
1112	1896	0	0	13	27	12	12	347666	1	0	0	0	0	1	0	0	0	0	0	0	0	0	0	0	0	628	0	39	95	1	1	8	6.44254016876221	64	663
1113	1897	0	0	13	24	12	8	354474	1	0	0	0	0	1	0	0	0	0	0	0	0	0	0	0	0	525	0	20	NA	6	1	5	6.26339817047119	25	663
1114	1899	0	0	12	32	8	8	361010	1	0	0	0	0	1	0	0	0	0	0	0	0	0	0	0	0	554	0	34	100	1	0	14	6.3171648979187	196	663
1115	1901	1	1	16	25	12	12	354474	1	0	0	0	0	1	0	0	0	0	0	0	0	0	1	0	1	641	0	36	130	6	1	3	6.46302938461304	9	663
1116	1903	1	1	13	34	8	12	352463	1	0	0	0	0	1	0	0	0	0	0	0	0	0	1	0	1	513	0	36	98	1	0	15	6.24027585983276	225	663
1117	1904	1	1	12	27	12	12	364640	1	0	0	0	0	1	0	0	0	0	0	0	0	0	1	0	1	604	0	36	103	1	1	9	6.40357398986816	81	663
1118	1905	1	1	13	33	8	15	352463	1	0	0	0	0	1	0	0	0	0	0	0	0	0	1	0	1	700	0	39	108	1	0	14	6.55108022689819	196	663
1119	1906	1	1	12	33	8	12	704926	1	0	0	0	0	1	0	0	0	0	0	0	0	0	1	0	1	606	0	38	NA	1	1	15	6.40687990188599	225	663
1120	1907	1	1	12	33	NA	12	704926	0	1	0	0	0	1	0	0	0	0	0	0	0	0	1	0	1	1021	0	47	101	1	1	15	6.92853784561157	225	663
1121	1911	1	1	12	31	16	12	476353	1	0	0	0	0	1	0	0	0	0	0	0	0	0	1	0	1	714	0	43	90	6	1	13	6.57088279724121	169	663
1122	1912	1	1	12	28	8	8	364640	1	0	0	0	0	1	0	0	0	0	0	0	0	0	1	0	1	500	0	34	79	1	1	10	6.21460819244385	100	663
1123	1913	1	1	12	28	14	8	364640	1	0	0	0	0	1	0	0	0	0	0	0	0	0	1	0	1	583	0	47	94	1	1	10	6.36818695068359	100	663
1124	1914	1	1	12	31	5	8	476353	1	0	0	0	0	1	0	0	0	0	0	0	0	0	1	0	1	706	0	41	115	1	0	13	6.55961513519287	169	663
1125	1917	1	1	16	30	11	12	484311	1	0	0	0	0	0	1	0	0	0	0	0	0	0	0	0	0	520	1	39	118	1	1	8	6.25382900238037	64	664
1126	1919	1	1	16	29	NA	NA	484311	1	0	0	0	0	0	1	0	0	0	0	0	0	0	1	0	1	656	0	41	114	1	1	7	6.48616075515747	49	664
1127	1920	1	1	16	28	16	14	370732	1	0	0	0	0	0	1	0	0	0	0	0	0	0	1	0	0	684	0	33	114	1	1	6	6.52795791625977	36	664
1128	1922	1	1	13	25	11	11	400440	1	0	0	0	0	0	1	0	0	0	0	0	0	0	1	0	1	276	0	33	84	1	1	6	5.62040090560913	36	664
1129	1923	1	1	13	34	NA	12	141996	1	0	0	0	0	0	1	0	0	0	0	0	0	1	1	0	1	707	0	37	92	1	1	15	6.56103086471558	225	664
1130	1926	1	1	12	34	8	11	358351	1	0	0	0	0	1	0	0	0	0	0	0	0	0	1	0	1	788	0	42	107	1	1	16	6.66949796676636	256	663
1131	1927	1	1	18	31	18	12	484311	1	0	0	0	0	1	0	0	0	0	0	0	0	0	1	0	1	1319	0	44	137	1	1	7	7.18462896347046	49	663
1132	1928	1	1	14	28	9	8	370732	1	0	0	0	0	1	0	0	0	0	0	0	0	0	1	0	1	404	0	33	129	6	0	8	6.00141477584839	64	663
1133	1929	1	1	16	25	12	12	360396	1	0	0	0	0	1	0	0	0	0	0	0	0	0	1	0	1	300	1	41	101	1	1	3	5.70378255844116	9	663
1134	1930	1	1	12	26	12	12	370732	1	0	0	0	0	1	0	0	0	0	0	0	0	0	1	0	1	673	0	40	98	1	1	8	6.51174545288086	64	663
1135	1933	1	1	12	34	NA	8	358351	1	0	0	0	0	1	0	0	0	0	0	0	0	0	1	0	1	722	0	41	108	1	0	16	6.58202505111694	256	663
1136	1935	1	1	16	26	8	2	358554	1	0	0	0	0	1	0	0	0	0	0	0	0	0	0	0	1	769	0	37	114	1	0	4	6.64509105682373	16	663
1137	1938	0	1	16	30	6	12	529281	1	0	0	0	0	0	1	0	0	0	0	0	0	0	0	0	0	760	0	37	110	1	1	8	6.63331842422485	64	664
1138	1939	0	1	18	30	11	12	529281	1	0	0	0	0	0	1	0	0	0	0	0	0	0	0	0	1	434	0	37	111	1	1	6	6.07304430007935	36	664
1139	1940	0	1	13	34	12	8	352463	1	0	0	0	0	0	1	0	0	0	0	0	0	0	0	0	0	1192	0	30	99	1	1	15	7.08338785171509	225	664
1140	1941	0	1	17	31	NA	4	476353	0	1	0	0	0	0	1	0	0	0	0	0	0	0	0	0	0	462	1	39	113	1	1	8	6.13556480407715	64	664
1141	1944	0	1	12	24	12	12	363070	1	0	0	0	0	0	1	0	0	0	0	0	0	0	0	0	0	370	0	29	101	1	1	6	5.91350317001343	36	664
1142	1945	0	1	12	30	12	12	487904	1	0	0	0	0	0	1	0	0	0	0	0	0	0	0	0	0	475	0	25	99	6	0	12	6.16331481933594	144	664
1143	1946	0	1	12	28	12	12	373482	1	0	0	0	0	0	1	0	0	0	0	0	0	0	0	0	0	435	0	37	101	1	0	10	6.07534599304199	100	664
1144	1947	0	1	12	26	8	12	373482	1	0	0	0	0	0	1	0	0	0	0	0	0	0	0	0	0	332	0	24	75	6	1	8	5.80513477325439	64	664
1145	1948	0	1	16	31	12	12	542115	1	0	0	0	0	0	1	0	0	0	0	0	0	0	1	0	0	640	0	49	102	6	1	9	6.46146821975708	81	664
1146	1949	0	1	12	34	NA	6	401122	0	0	1	0	0	0	1	0	0	0	0	0	0	0	0	0	0	505	0	29	91	1	0	16	6.22455835342407	256	664
1147	1952	0	1	16	29	10	12	454179	1	0	0	0	0	0	1	0	0	0	0	0	0	0	0	0	0	625	0	38	113	1	0	7	6.43775177001953	49	664
1148	1953	0	1	12	31	NA	8	454179	1	0	0	0	0	0	1	0	0	0	0	0	0	0	0	0	0	462	0	34	120	1	1	13	6.13556480407715	169	664
1149	1957	1	1	17	27	16	16	370732	1	0	0	0	0	1	0	0	0	0	0	0	0	0	1	1	1	817	0	42	134	1	1	4	6.70563888549805	16	663
1150	1960	1	1	17	24	NA	13	360396	1	0	0	0	0	1	0	0	0	0	0	0	0	0	1	0	1	433	1	26	105	1	1	1	6.07073783874512	1	663
1151	1961	1	1	14	25	15	12	360396	1	0	0	0	0	1	0	0	0	0	0	0	0	0	1	0	1	641	0	32	98	6	1	5	6.46302938461304	25	663
1152	1962	1	1	15	25	15	12	360396	1	0	0	0	0	1	0	0	0	0	0	0	0	0	0	0	1	225	1	28	107	4	1	4	5.41610050201416	16	663
1153	1964	1	1	15	34	NA	14	167813	0	0	1	0	0	1	0	0	0	0	0	0	0	1	1	0	1	721	1	39	110	1	1	13	6.58063936233521	169	663
1154	1967	1	1	16	26	12	12	370732	1	0	0	0	0	1	0	0	0	0	0	0	0	0	1	0	1	722	0	30	101	6	1	4	6.58202505111694	16	663
1155	1969	1	1	16	29	16	16	484311	1	0	0	0	0	1	0	0	0	0	0	0	0	0	1	0	1	817	0	31	107	1	1	7	6.70563888549805	49	663
1156	1970	1	1	16	27	16	13	370732	1	0	0	0	0	1	0	0	0	0	0	0	0	0	1	0	1	664	0	43	115	1	1	5	6.49828195571899	25	663
1157	1971	1	1	18	28	12	12	370732	0	0	0	0	0	1	0	0	0	0	0	0	0	0	1	0	1	897	0	39	121	1	1	4	6.79905605316162	16	663
1158	1973	1	1	11	34	NA	NA	358351	1	0	0	0	0	1	0	0	0	0	0	0	0	0	1	0	1	793	0	40	115	1	1	17	6.67582321166992	289	663
1159	1975	1	1	15	31	10	12	484311	1	0	0	0	0	1	0	0	0	0	0	0	0	0	1	0	1	539	0	42	134	1	1	10	6.28971576690674	100	663
1160	1976	1	1	11	27	10	12	370732	1	0	0	0	0	1	0	0	0	0	0	0	0	0	1	0	1	897	0	39	NA	1	1	10	6.79905605316162	100	663
1161	1979	1	1	15	30	13	12	484311	1	0	0	0	0	1	0	0	0	0	0	0	0	0	1	0	1	721	0	52	105	1	1	9	6.58063936233521	81	663
1162	1980	1	1	13	24	12	12	360396	1	0	0	0	0	1	0	0	0	0	0	0	0	0	1	0	1	925	0	28	97	1	1	5	6.82979393005371	25	663
1163	1982	1	1	12	28	8	10	370732	1	0	0	0	0	1	0	0	0	0	0	0	0	0	1	0	1	508	0	38	108	1	1	10	6.23048162460327	100	663
1164	1983	1	1	16	32	8	10	358351	1	0	0	0	0	1	0	0	0	0	0	0	0	0	1	0	1	929	0	45	113	6	1	10	6.83410882949829	100	663
1165	1985	1	1	17	33	NA	NA	398168	1	0	0	0	0	1	0	0	0	0	0	0	0	0	1	0	1	705	0	47	96	1	1	10	6.55819797515869	100	663
1166	1987	1	1	12	30	NA	5	484311	0	1	0	0	0	1	0	0	0	0	0	0	0	0	1	0	1	865	0	39	NA	1	1	12	6.76272964477539	144	663
1167	1989	1	1	16	24	12	12	360396	1	0	0	0	0	1	0	0	0	0	0	0	0	0	1	0	1	520	0	41	137	1	1	2	6.25382900238037	4	663
1168	1991	1	1	12	24	10	8	360396	1	0	0	0	0	1	0	0	0	0	0	0	0	0	1	0	1	417	0	30	NA	1	1	6	6.03308629989624	36	663
1169	1992	1	1	15	26	10	10	370732	1	0	0	0	0	1	0	0	0	0	0	0	0	0	1	0	1	266	1	37	NA	6	1	5	5.58349609375	25	663
1170	1993	1	1	15	24	16	14	360396	1	0	0	0	0	1	0	0	0	0	0	0	0	0	1	0	1	625	0	30	NA	6	1	3	6.43775177001953	9	663
1171	1994	1	1	12	31	NA	12	484311	1	0	0	0	0	1	0	0	0	0	0	0	0	0	1	0	1	940	0	34	110	1	1	13	6.84588003158569	169	663
1172	1999	1	1	16	25	16	12	360396	1	0	0	0	0	1	0	0	0	0	0	0	0	0	1	0	1	766	0	38	120	6	1	3	6.64118194580078	9	663
1173	2001	1	1	9	29	10	12	484311	1	0	0	0	0	1	0	0	0	0	0	0	0	0	1	0	1	801	0	26	NA	1	1	14	6.68586111068726	196	663
1174	2002	1	1	15	28	10	12	370732	1	0	0	0	0	1	0	0	0	0	0	0	0	0	1	0	1	707	0	36	105	6	1	7	6.56103086471558	49	663
1175	2004	1	1	12	30	NA	10	468402	0	1	0	0	0	1	0	0	0	0	0	0	0	0	1	0	1	684	0	40	121	1	1	12	6.52795791625977	144	663
1176	2005	1	1	16	26	9	12	358554	1	0	0	0	0	1	0	0	0	0	0	0	0	0	1	0	1	417	0	29	113	1	1	4	6.03308629989624	16	663
1177	2008	1	1	18	29	8	12	468402	1	0	0	0	0	1	0	0	0	0	0	0	0	0	1	0	0	600	0	41	113	6	0	5	6.39692974090576	25	663
1178	2009	1	1	15	25	NA	13	360396	0	0	1	0	0	1	0	0	0	0	0	0	0	0	1	0	1	682	0	37	101	4	0	4	6.52502965927124	16	663
1179	2010	1	1	18	31	12	9	236774	1	0	0	0	0	1	0	0	0	0	0	0	0	0	0	0	0	918	0	41	104	1	1	7	6.82219743728638	49	663
1180	2011	1	1	12	32	NA	NA	175194	0	0	0	0	0	1	0	0	0	0	0	0	0	0	1	0	1	738	0	37	96	1	1	14	6.60394382476807	196	663
1181	2015	1	1	12	28	10	12	358554	1	0	0	0	0	1	0	0	0	0	0	0	0	0	1	0	1	1167	1	32	92	4	1	10	7.06219148635864	100	663
1182	2016	1	1	11	29	10	10	468402	1	0	0	0	0	1	0	0	0	0	0	0	0	0	1	0	1	765	0	23	80	1	0	12	6.63987588882446	144	663
1183	2017	1	1	12	26	10	10	358554	1	0	0	0	0	1	0	0	0	0	0	0	0	0	1	0	1	962	0	28	117	5	0	8	6.86901426315308	64	663
1184	2018	1	1	18	27	12	12	358554	1	0	0	0	0	1	0	0	0	0	0	0	0	0	1	0	1	300	0	44	134	6	1	3	5.70378255844116	9	663
1185	2019	1	1	16	24	12	12	348558	1	0	0	0	0	1	0	0	0	0	0	0	0	0	1	0	1	658	0	42	126	6	1	2	6.48920488357544	4	663
1186	2020	1	1	12	26	8	8	358554	1	0	0	0	0	1	0	0	0	0	0	0	0	0	1	0	1	462	0	25	95	1	1	8	6.13556480407715	64	663
1187	2021	1	1	12	24	8	8	348558	1	0	0	0	0	1	0	0	0	0	0	0	0	0	1	0	1	721	0	18	102	1	1	6	6.58063936233521	36	663
1188	2024	1	1	12	25	8	12	348558	1	0	0	0	0	1	0	0	0	0	0	0	0	0	1	0	1	865	0	36	NA	1	0	7	6.76272964477539	49	663
1189	2026	1	1	11	24	7	5	348558	1	0	0	0	0	1	0	0	0	0	0	0	0	0	1	0	1	596	0	22	NA	1	1	7	6.39024066925049	49	663
1190	2029	1	1	12	32	8	10	358351	1	0	0	0	0	1	0	0	0	0	0	0	0	0	1	0	1	909	0	42	112	1	1	14	6.81234502792358	196	663
1191	2030	1	1	12	29	8	10	484311	1	0	0	0	0	1	0	0	0	0	0	0	0	0	1	0	1	1049	0	45	NA	1	1	11	6.9555926322937	121	663
1192	2031	1	1	13	34	NA	NA	358351	1	0	0	0	0	1	0	0	0	0	0	0	0	0	1	1	1	455	0	47	104	1	1	15	6.1202974319458	225	663
1193	2034	1	1	12	27	NA	NA	99110	1	0	0	0	0	1	0	0	0	0	0	0	0	1	0	1	1	675	0	32	81	6	1	9	6.51471281051636	81	663
1194	2035	1	1	12	24	NA	NA	96681	1	0	0	0	0	1	0	0	0	0	0	0	0	1	1	0	1	721	0	20	70	6	1	6	6.58063936233521	36	663
1195	2039	1	1	7	33	8	8	141996	1	0	0	0	0	1	0	0	0	0	0	0	0	1	1	0	1	600	0	NA	NA	1	1	20	6.39692974090576	400	663
1196	2040	1	1	12	28	8	8	99110	1	0	0	0	0	1	0	0	0	0	0	0	0	1	1	0	1	925	0	18	70	6	1	10	6.82979393005371	100	663
1197	2041	1	1	12	28	6	6	370732	1	0	0	0	0	1	0	0	0	0	0	0	0	0	1	0	1	750	0	20	83	1	1	10	6.62007331848145	100	663
1198	2042	1	1	12	28	6	6	370732	1	0	0	0	0	1	0	0	0	0	0	0	0	0	1	0	1	563	0	13	84	1	1	10	6.33327960968018	100	663
1199	2046	1	1	14	26	12	10	370732	1	0	0	0	0	1	0	0	0	0	0	0	0	0	1	0	1	625	0	25	104	1	0	6	6.43775177001953	36	663
1200	2047	1	1	10	29	NA	NA	538123	0	1	0	0	0	1	0	0	0	0	0	0	0	0	0	0	1	300	0	30	82	1	1	13	5.70378255844116	169	663
1201	2049	1	1	12	27	8	12	370732	1	0	0	0	0	1	0	0	0	0	0	0	0	0	0	0	1	1380	0	32	109	1	1	9	7.22983884811401	81	663
1202	2050	1	1	14	25	12	12	348558	1	0	0	0	0	1	0	0	0	0	0	0	0	0	1	0	1	470	0	25	111	1	1	5	6.15273284912109	25	663
1203	2052	1	1	12	28	12	12	358554	1	0	0	0	0	1	0	0	0	0	0	0	0	0	1	0	1	788	0	37	97	1	1	10	6.66949796676636	100	663
1204	2054	1	1	16	25	8	12	348558	1	0	0	0	0	1	0	0	0	0	0	0	0	0	1	0	1	230	1	33	120	1	1	3	5.43807935714722	9	663
1205	2057	0	0	10	27	12	12	373482	1	0	0	0	0	1	0	0	0	0	0	0	0	0	0	0	0	389	0	34	NA	4	1	11	5.96357917785645	121	663
1206	2058	0	0	12	33	7	12	401122	1	0	0	0	0	1	0	0	0	0	0	0	0	0	1	0	0	315	0	33	94	1	0	15	5.75257253646851	225	663
1207	2059	0	0	17	29	3	5	487904	1	0	0	0	0	1	0	0	0	0	0	0	0	0	1	0	0	355	1	46	116	1	1	6	5.87211799621582	36	663
1208	2060	0	0	8	26	5	8	373482	1	0	0	0	0	1	0	0	0	0	0	0	0	0	1	0	0	500	0	25	NA	1	0	12	6.21460819244385	144	663
1209	2062	0	0	11	33	8	11	401122	1	0	0	0	0	1	0	0	0	0	0	0	0	0	0	0	0	650	0	30	NA	1	0	16	6.47697257995605	256	663
1210	2063	0	0	12	27	8	11	373482	1	0	0	0	0	1	0	0	0	0	0	0	0	0	1	0	0	815	0	29	NA	6	1	9	6.70318794250488	81	663
1211	2064	0	0	13	26	13	12	347666	1	0	0	0	0	1	0	0	0	0	0	0	0	0	0	0	0	649	0	33	101	6	1	7	6.47543287277222	49	663
1212	2065	0	0	12	29	9	NA	454179	0	0	1	0	0	1	0	0	0	0	0	0	0	0	1	0	0	435	0	36	98	1	0	11	6.07534599304199	121	663
1213	2066	1	0	11	27	10	15	364640	1	0	0	0	0	1	0	0	0	0	0	0	0	0	0	0	0	600	0	32	110	1	0	10	6.39692974090576	100	663
1214	2070	1	0	13	26	16	14	373482	1	0	0	0	0	1	0	0	0	0	0	0	0	0	1	1	0	206	0	42	131	1	1	7	5.32787609100342	49	663
1215	2072	1	0	12	27	12	11	373482	1	0	0	0	0	1	0	0	0	0	0	0	0	0	1	1	1	481	0	46	122	1	1	9	6.17586708068848	81	663
1216	2073	1	0	13	24	12	10	363070	1	0	0	0	0	1	0	0	0	0	0	0	0	0	1	1	1	485	0	33	88	4	1	5	6.18414878845215	25	663
1217	2074	1	0	18	29	12	12	454179	1	0	0	0	0	1	0	0	0	0	0	0	0	0	1	0	1	759	0	39	111	1	0	5	6.63200187683105	25	663
1218	2075	1	0	12	26	12	12	347666	1	0	0	0	0	1	0	0	0	0	0	0	0	0	1	0	1	995	0	35	90	1	0	8	6.90274286270142	64	663
1219	2076	0	1	12	29	NA	NA	538123	0	0	0	0	0	0	1	0	0	0	0	0	0	0	1	0	1	1167	0	41	NA	1	1	11	7.06219148635864	121	664
1220	2078	0	1	16	25	12	12	360396	1	0	0	0	0	0	1	0	0	0	0	0	0	0	1	0	1	314	0	38	120	1	1	3	5.74939298629761	9	664
1221	2080	1	1	13	25	14	12	360396	1	0	0	0	0	1	0	0	0	0	0	0	0	0	1	0	1	915	0	25	NA	6	1	6	6.81892395019531	36	663
1222	2082	1	1	13	26	16	12	370732	1	0	0	0	0	1	0	0	0	0	0	0	0	0	1	0	1	664	1	35	NA	1	1	7	6.49828195571899	49	663
1223	2083	1	1	12	29	NA	8	484311	0	0	1	0	0	1	0	0	0	0	0	0	0	0	1	0	1	783	0	29	108	4	1	11	6.6631326675415	121	663
1224	2084	1	1	13	32	8	12	358351	1	0	0	0	0	1	0	0	0	0	0	0	0	0	1	0	1	650	0	43	99	1	1	13	6.47697257995605	169	663
1225	2087	0	1	9	27	12	6	364640	1	0	0	0	0	1	0	0	0	0	0	0	0	0	1	1	1	267	0	36	NA	1	0	12	5.58724880218506	144	663
1226	2088	0	1	8	33	8	8	352463	1	0	0	0	0	1	0	0	0	0	0	0	0	0	0	0	1	355	0	NA	NA	1	0	19	5.87211799621582	361	663
1227	2089	0	1	8	33	NA	NA	391625	0	0	0	0	0	1	0	0	0	0	0	0	0	0	0	0	1	440	0	34	NA	1	0	19	6.0867748260498	361	663
1228	2090	0	1	11	30	6	12	476353	1	0	0	0	0	1	0	0	0	0	0	0	0	0	1	0	1	475	0	31	80	1	0	13	6.16331481933594	169	663
1229	2091	0	1	11	32	5	10	352463	1	0	0	0	0	1	0	0	0	0	0	0	0	0	1	0	1	726	0	45	93	1	1	15	6.58755016326904	225	663
1230	2092	0	1	16	28	17	12	364640	0	1	0	0	0	0	1	0	0	0	0	0	0	0	1	0	1	721	0	42	96	1	1	6	6.58063936233521	36	664
1231	2093	0	1	12	34	NA	NA	352463	0	0	0	0	0	1	0	0	0	0	0	0	0	0	1	0	1	563	0	46	85	1	0	16	6.33327960968018	256	663
1232	2095	0	1	12	26	12	13	364640	1	0	0	0	0	1	0	0	0	0	0	0	0	0	1	0	1	600	0	32	108	1	1	8	6.39692974090576	64	663
1233	2097	0	1	15	25	13	12	354474	1	0	0	0	0	1	0	0	0	0	0	0	0	0	1	0	1	692	0	36	110	1	1	4	6.53958606719971	16	663
1234	2098	0	1	15	28	10	11	364640	1	0	0	0	0	1	0	0	0	0	0	0	0	0	1	0	1	423	0	43	118	4	1	7	6.04737234115601	49	663
1235	2099	0	1	12	24	14	NA	354474	1	0	0	0	0	1	0	0	0	0	0	0	0	0	1	0	1	786	0	30	102	1	1	6	6.66695690155029	36	663
1236	2100	0	1	12	31	8	12	476353	1	0	0	0	0	1	0	0	0	0	0	0	0	0	1	0	1	1202	0	44	NA	1	1	13	7.09174203872681	169	663
1237	2101	0	1	16	34	NA	18	352463	0	1	0	0	0	1	0	0	0	0	0	0	0	0	1	0	1	577	0	46	113	4	1	12	6.35784244537354	144	663
1238	2102	0	1	18	27	11	10	1093919	1	0	0	0	0	1	0	0	0	0	0	0	0	0	0	0	0	635	0	37	112	1	1	3	6.45362520217896	9	663
1239	2105	0	1	12	27	NA	12	364640	1	0	0	0	0	1	0	0	0	0	0	0	0	0	1	0	1	410	0	31	115	1	1	9	6.01615715026855	81	663
1240	2113	0	1	16	24	12	10	86649	1	0	0	0	0	1	0	0	0	0	0	0	0	0	1	0	1	370	0	30	117	1	1	2	5.91350317001343	4	663
1241	2114	0	1	16	26	11	10	89134	1	0	0	0	0	1	0	0	0	0	0	0	0	0	1	0	1	789	0	28	119	1	1	4	6.67076635360718	16	663
1242	2115	0	1	17	24	11	10	86649	1	0	0	0	0	1	0	0	0	0	0	0	0	0	1	0	1	450	0	32	NA	1	1	1	6.10924768447876	1	663
1243	2116	0	1	12	28	11	12	89134	1	0	0	0	0	1	0	0	0	0	0	0	0	0	1	0	1	1251	0	39	94	1	1	10	7.13169860839844	100	663
1244	2117	1	1	16	30	16	13	484311	1	0	0	0	0	0	1	0	0	0	0	0	0	0	1	0	1	808	0	42	109	1	1	8	6.69456195831299	64	664
1245	2121	1	1	16	30	8	12	520447	1	0	0	0	0	0	1	0	0	0	0	0	0	0	1	0	1	308	0	49	107	1	0	8	5.73009967803955	64	664
1246	2123	0	1	12	30	12	12	476353	1	0	0	0	0	0	1	0	0	0	0	0	0	0	0	0	0	817	0	29	NA	1	1	12	6.70563888549805	144	664
1247	2126	0	1	16	30	6	6	476353	1	0	0	0	0	0	1	0	0	0	0	0	0	0	1	0	0	673	0	38	121	6	1	8	6.51174545288086	64	664
1248	2127	0	1	12	29	NA	NA	476353	1	0	0	0	0	0	1	0	0	0	0	0	0	0	0	0	0	524	1	32	90	1	1	11	6.2614917755127	121	664
1249	2128	0	1	15	30	8	9	476353	1	0	0	0	0	0	1	0	0	0	0	0	0	0	0	0	0	275	0	34	NA	1	0	9	5.61677122116089	81	664
1250	2131	0	1	17	28	14	12	364640	1	0	0	0	0	0	1	0	0	0	0	0	0	0	0	0	0	423	0	32	NA	1	1	5	6.04737234115601	25	664
1251	2132	0	1	16	28	10	8	364640	1	0	0	0	0	0	1	0	0	0	0	0	0	0	1	0	0	641	0	38	NA	1	1	6	6.46302938461304	36	664
1252	2133	0	1	12	28	9	9	364640	1	0	0	0	0	0	1	0	0	0	0	0	0	0	0	0	0	450	0	37	121	6	0	10	6.10924768447876	100	664
1253	2134	0	1	12	26	6	7	364640	1	0	0	0	0	0	1	0	0	0	0	0	0	0	0	0	0	333	0	21	89	1	1	8	5.80814266204834	64	664
1254	2135	0	1	12	32	8	12	361010	1	0	0	0	0	0	1	0	0	0	0	0	0	0	0	0	0	913	0	28	101	1	0	14	6.81673574447632	196	664
1255	2140	0	1	11	27	8	9	347666	1	0	0	0	0	0	1	0	0	0	0	0	0	0	0	0	0	128	0	21	68	6	0	10	4.8520302772522	100	664
1256	2143	0	1	16	27	14	12	364640	1	0	0	0	0	0	1	0	0	0	0	0	0	0	0	0	1	396	0	50	118	1	1	5	5.98141431808472	25	664
1257	2144	0	1	13	28	12	12	364640	1	0	0	0	0	0	1	0	0	0	0	0	0	0	1	0	0	475	1	40	102	1	1	9	6.16331481933594	81	664
1258	2146	0	1	13	31	8	12	476353	1	0	0	0	0	0	1	0	0	0	0	0	0	0	0	0	0	450	0	38	NA	1	1	12	6.10924768447876	144	664
1259	2147	0	1	16	24	12	12	337974	1	0	0	0	0	0	1	0	0	0	0	0	0	0	0	0	0	300	0	27	102	1	1	2	5.70378255844116	4	664
1260	2148	0	1	18	29	8	12	476353	1	0	0	0	0	1	0	0	0	0	0	0	0	0	1	0	1	462	0	47	NA	1	1	5	6.13556480407715	25	663
1261	2150	0	1	12	32	7	9	352463	1	0	0	0	0	1	0	0	0	0	0	0	0	0	0	0	0	630	0	48	109	1	1	14	6.44571971893311	196	663
1262	2151	0	1	12	33	6	4	352463	1	0	0	0	0	1	0	0	0	0	0	0	0	0	0	0	0	485	0	38	94	1	0	15	6.18414878845215	225	663
1263	2155	0	1	12	30	5	6	454179	1	0	0	0	0	1	0	0	0	0	0	0	0	0	0	0	0	549	0	34	115	1	1	12	6.30809831619263	144	663
1264	2156	0	1	12	25	5	6	337974	1	0	0	0	0	1	0	0	0	0	0	0	0	0	0	0	0	372	0	30	101	6	1	7	5.91889381408691	49	663
1265	2157	0	1	12	34	4	8	361010	1	0	0	0	0	1	0	0	0	0	0	0	0	0	0	0	0	641	0	41	92	1	1	16	6.46302938461304	256	663
1266	2159	0	1	12	29	NA	8	454179	0	1	0	0	0	1	0	0	0	0	0	0	0	0	1	0	0	519	0	37	89	1	0	11	6.25190401077271	121	663
1267	2160	0	1	9	26	5	11	373482	1	0	0	0	0	1	0	0	0	0	0	0	0	0	0	0	0	385	0	32	71	5	1	11	5.95324325561523	121	663
1268	2161	0	1	16	29	12	8	487904	1	0	0	0	0	1	0	0	0	0	0	0	0	0	1	1	1	450	0	32	97	1	1	7	6.10924768447876	49	663
1269	2163	0	0	12	26	10	12	364640	1	0	0	0	0	0	1	0	0	0	0	0	0	0	0	0	0	315	0	38	116	1	1	8	5.75257253646851	64	664
1270	2165	0	0	14	29	11	12	487904	1	0	0	0	0	0	1	0	0	0	0	0	0	0	0	0	0	731	0	39	130	1	1	9	6.59441328048706	81	664
1271	2166	0	0	12	32	6	12	391625	1	0	0	0	0	0	1	0	0	0	0	0	0	0	0	0	0	325	0	34	102	1	1	14	5.78382539749146	196	664
1272	2167	0	0	16	28	12	12	373482	1	0	0	0	0	0	1	0	0	0	0	0	0	0	1	0	0	616	0	38	119	1	1	6	6.42324686050415	36	664
1273	2169	0	0	15	30	10	10	487904	1	0	0	0	0	0	1	0	0	0	0	0	0	0	1	0	0	346	0	45	104	4	1	9	5.84643888473511	81	664
1274	2170	0	0	13	28	8	13	373482	1	0	0	0	0	0	1	0	0	0	0	0	0	0	1	0	0	471	0	42	91	6	1	9	6.15485811233521	81	664
1275	2172	0	0	12	27	7	8	347666	1	0	0	0	0	0	1	0	0	0	0	0	0	0	0	0	0	300	0	34	93	6	0	9	5.70378255844116	81	664
1276	2174	0	1	13	24	15	10	354474	1	0	0	0	0	1	0	0	0	0	0	0	0	0	1	0	1	430	0	32	NA	1	1	5	6.06378507614136	25	663
1277	2175	0	1	12	28	12	8	405634	1	0	0	0	0	1	0	0	0	0	0	0	0	1	1	0	1	267	0	37	95	1	0	10	5.58724880218506	100	663
1278	2176	0	1	12	28	13	10	364640	0	0	1	0	0	1	0	0	0	0	0	0	0	0	1	0	1	230	0	24	74	4	1	10	5.43807935714722	100	663
1279	2177	0	1	14	24	NA	10	354474	0	1	0	0	0	1	0	0	0	0	0	0	0	0	1	0	1	432	0	24	115	6	1	4	6.06842565536499	16	663
1280	2178	0	1	12	26	12	12	364640	1	0	0	0	0	1	0	0	0	0	0	0	0	0	1	0	1	531	0	31	89	1	1	8	6.27476215362549	64	663
1281	2179	0	1	12	27	12	11	89134	1	0	0	0	0	1	0	0	0	0	0	0	0	0	1	0	1	1100	0	38	92	1	1	9	7.00306558609009	81	663
1282	2180	0	1	12	28	8	12	89240	1	0	0	0	0	1	0	0	0	0	0	0	0	1	1	0	1	588	0	25	104	1	1	10	6.37672710418701	100	663
1283	2181	0	1	18	30	NA	15	476353	1	0	0	0	0	1	0	0	0	0	0	0	0	0	0	0	1	841	0	44	109	1	1	6	6.73459148406982	36	663
1284	2183	0	1	15	24	NA	10	354474	0	1	0	0	0	1	0	0	0	0	0	0	0	0	1	0	1	641	0	23	124	1	1	3	6.46302938461304	9	663
1285	2185	0	1	14	34	12	12	361010	1	0	0	0	0	1	0	0	0	0	0	0	0	0	1	0	1	962	0	41	NA	1	1	14	6.86901426315308	196	663
1286	2186	0	1	13	33	11	12	361010	1	0	0	0	0	1	0	0	0	0	0	0	0	0	1	0	1	921	0	37	NA	1	0	14	6.8254599571228	196	663
1287	2187	0	0	15	27	NA	12	414980	1	0	0	0	0	0	1	0	0	0	0	0	0	0	0	0	0	350	0	29	94	1	1	6	5.85793304443359	36	664
1288	2188	0	0	16	24	12	12	363070	1	0	0	0	0	0	1	0	0	0	0	0	0	0	0	0	0	385	0	25	NA	NA	1	2	5.95324325561523	4	664
1289	2189	0	0	16	33	4	12	401122	1	0	0	0	0	0	1	0	0	0	0	0	0	0	0	0	0	618	0	44	120	1	1	11	6.42648839950562	121	664
1290	2190	0	0	13	31	NA	NA	529281	1	0	0	0	0	0	1	0	0	0	0	0	0	0	1	0	1	470	1	35	103	1	1	12	6.15273284912109	144	664
1291	2192	0	0	12	27	12	NA	373482	0	0	0	0	0	0	1	0	0	0	0	0	0	0	0	0	0	411	0	31	92	1	1	9	6.01859331130981	81	664
1292	2195	0	0	12	25	12	10	403411	1	0	0	0	0	0	1	0	0	0	0	0	0	0	0	0	0	400	0	24	111	1	1	7	5.99146461486816	49	664
1293	2199	0	0	11	33	9	8	391625	1	0	0	0	0	1	0	0	0	0	0	0	0	0	1	0	1	700	0	40	96	1	0	16	6.55108022689819	256	663
1294	2202	0	0	15	27	12	12	373482	1	0	0	0	0	1	0	0	0	0	0	0	0	0	1	0	1	311	1	40	103	1	0	6	5.7397928237915	36	663
1295	2203	0	0	14	24	12	12	363070	1	0	0	0	0	1	0	0	0	0	0	0	0	0	0	1	1	243	0	35	110	1	1	4	5.49306154251099	16	663
1296	2208	0	0	12	32	5	7	127854	1	0	0	0	0	1	0	0	0	0	0	0	0	1	1	1	1	248	0	35	67	5	0	14	5.51342868804932	196	663
1297	2209	0	0	11	30	8	8	135156	1	0	0	0	0	1	0	0	0	0	0	0	0	1	1	0	1	423	0	26	69	6	1	13	6.04737234115601	169	663
1298	2211	0	0	11	33	8	8	127854	1	0	0	0	0	1	0	0	0	0	0	0	0	1	1	0	1	600	0	32	91	5	1	16	6.39692974090576	256	663
1299	2212	0	0	17	25	8	4	102879	1	0	0	0	0	1	0	0	0	0	0	0	0	1	1	0	1	700	0	34	104	1	1	2	6.55108022689819	4	663
1300	2213	0	0	12	24	10	12	363070	1	0	0	0	0	1	0	0	0	0	0	0	0	0	1	0	1	300	0	36	124	6	1	6	5.70378255844116	36	663
1301	2215	0	0	12	24	11	12	363070	1	0	0	0	0	1	0	0	0	0	0	0	0	0	1	0	1	691	0	42	98	1	0	6	6.53813982009888	36	663
1302	2216	0	0	12	30	7	9	542115	1	0	0	0	0	1	0	0	0	0	0	0	0	0	1	0	1	600	0	48	86	1	1	12	6.39692974090576	144	663
1303	2218	0	0	12	30	NA	12	476353	0	1	0	0	0	1	0	0	0	0	0	0	0	0	1	0	1	700	0	44	118	1	1	12	6.55108022689819	144	663
1304	2219	0	0	14	25	12	12	363070	1	0	0	0	0	1	0	0	0	0	0	0	0	0	0	0	1	275	1	NA	98	6	0	5	5.61677122116089	25	663
1305	2223	0	0	9	34	4	7	151100	1	0	0	0	0	1	0	0	0	0	0	0	0	1	1	0	1	675	0	23	92	1	1	19	6.51471281051636	361	663
1306	2224	0	0	17	28	12	12	89134	1	0	0	0	0	1	0	0	0	0	0	0	0	0	1	0	1	449	1	40	116	1	1	5	6.10702276229858	25	663
1307	2225	0	0	16	30	12	12	116442	1	0	0	0	0	1	0	0	0	0	0	0	0	0	1	0	1	635	0	43	97	1	1	8	6.45362520217896	64	663
1308	2226	0	0	14	29	10	9	476353	1	0	0	0	0	1	0	0	0	0	0	0	0	0	0	0	0	1250	0	44	109	1	1	9	7.13089895248413	81	663
1309	2227	0	0	18	29	8	18	504643	1	0	0	0	0	1	0	0	0	0	0	0	0	0	1	0	1	962	0	33	105	1	1	5	6.86901426315308	25	663
1310	2228	0	0	18	25	10	13	363070	0	0	1	0	0	1	0	0	0	0	0	0	0	0	0	0	0	490	0	32	99	6	1	1	6.1944055557251	1	663
1311	2230	0	0	12	24	10	13	363070	0	0	1	0	0	1	0	0	0	0	0	0	0	0	0	0	0	586	0	28	NA	4	1	6	6.37331962585449	36	663
1312	2231	0	0	14	33	NA	12	361010	1	0	0	0	0	1	0	0	0	0	0	0	0	0	0	0	0	750	0	NA	108	1	1	13	6.62007331848145	169	663
1313	2232	0	0	18	26	12	12	89134	0	0	1	0	0	1	0	0	0	0	0	0	0	0	0	0	0	326	0	39	100	6	1	2	5.7868971824646	4	663
1314	2233	0	0	18	29	17	12	116442	1	0	0	0	0	1	0	0	0	0	0	0	0	0	1	0	1	430	0	35	117	1	1	5	6.06378507614136	25	663
1315	2234	0	0	12	26	12	11	373482	1	0	0	0	0	1	0	0	0	0	0	0	0	0	1	0	0	571	0	25	101	1	1	8	6.34738922119141	64	663
1316	2235	0	0	16	28	9	12	373482	1	0	0	0	0	1	0	0	0	0	0	0	0	0	0	0	1	913	0	40	111	1	1	6	6.81673574447632	36	663
1317	2236	0	0	14	30	4	10	487904	1	0	0	0	0	1	0	0	0	0	0	0	0	0	0	0	0	577	0	44	101	1	1	10	6.35784244537354	100	663
1318	2237	0	0	11	32	NA	NA	352463	1	0	0	0	0	1	0	0	0	0	0	0	0	0	0	0	1	433	0	36	NA	1	1	15	6.07073783874512	225	663
1319	2238	0	0	12	24	9	8	363070	1	0	0	0	0	1	0	0	0	0	0	0	0	0	0	0	0	505	0	21	NA	1	0	6	6.22455835342407	36	663
1320	2239	0	1	18	34	NA	8	352463	1	0	0	0	0	1	0	0	0	0	0	0	0	0	0	0	0	721	0	45	92	1	1	10	6.58063936233521	100	663
1321	2240	0	1	16	33	14	8	352463	1	0	0	0	0	1	0	0	0	0	0	0	0	0	1	0	0	962	0	38	106	1	1	11	6.86901426315308	121	663
1322	2241	0	1	12	31	13	14	487904	1	0	0	0	0	1	0	0	0	0	0	0	0	0	1	0	0	609	0	33	NA	4	0	13	6.4118185043335	169	663
1323	2244	0	1	12	25	12	12	363070	1	0	0	0	0	1	0	0	0	0	0	0	0	0	0	0	0	450	0	33	NA	1	0	7	6.10924768447876	49	663
1324	2245	1	0	12	33	10	12	391625	1	0	0	0	0	1	0	0	0	0	0	0	0	0	0	0	0	625	0	37	102	1	1	15	6.43775177001953	225	663
1325	2246	1	0	14	26	10	12	364640	1	0	0	0	0	1	0	0	0	0	0	0	0	0	0	0	0	713	0	28	115	1	1	6	6.56948137283325	36	663
1326	2247	1	0	12	24	8	10	354474	1	0	0	0	0	1	0	0	0	0	0	0	0	0	0	0	0	710	0	37	99	1	1	6	6.56526517868042	36	663
1327	2250	1	0	16	32	10	11	704926	1	0	0	0	0	1	0	0	0	0	0	0	0	0	1	0	0	913	0	48	118	1	1	10	6.81673574447632	100	663
1328	2251	1	0	8	24	8	8	708947	1	0	0	0	0	1	0	0	0	0	0	0	0	0	0	0	0	418	0	21	NA	1	0	10	6.03548145294189	100	663
1329	2254	0	0	13	29	16	13	476353	1	0	0	0	0	0	1	0	0	0	0	0	0	0	0	0	1	692	0	37	132	1	1	10	6.53958606719971	100	664
1330	2255	0	0	12	34	NA	NA	352463	1	0	0	0	0	0	1	0	0	0	0	0	0	0	1	0	1	260	0	34	NA	1	0	16	5.56068181991577	256	664
1331	2256	0	0	13	26	16	12	364640	1	0	0	0	0	0	1	0	0	0	0	0	0	0	1	0	1	650	0	26	108	1	1	7	6.47697257995605	49	664
1332	2257	0	0	14	25	16	12	354474	1	0	0	0	0	0	1	0	0	0	0	0	0	0	1	0	1	610	0	35	103	1	1	5	6.41345882415771	25	664
1333	2260	0	0	12	29	10	14	476353	1	0	0	0	0	0	1	0	0	0	0	0	0	0	1	0	1	726	0	40	98	5	1	11	6.58755016326904	121	664
1334	2261	0	0	13	32	11	8	352463	1	0	0	0	0	0	1	0	0	0	0	0	0	0	1	0	1	767	0	44	111	1	0	13	6.64248657226562	169	664
1335	2264	0	0	12	27	11	12	373482	1	0	0	0	0	0	1	0	0	0	0	0	0	0	0	0	0	620	0	29	97	1	0	9	6.4297194480896	81	664
1336	2266	0	0	16	27	NA	12	364640	1	0	0	0	0	0	1	0	0	0	0	0	0	0	1	0	0	721	0	33	101	1	0	5	6.58063936233521	25	664
1337	2267	0	0	18	26	12	14	373482	1	0	0	0	0	0	1	0	0	0	0	0	0	0	1	0	0	516	0	36	129	3	1	2	6.24610662460327	4	664
1338	2269	0	0	12	25	11	10	363070	1	0	0	0	0	0	1	0	0	0	0	0	0	0	0	0	0	400	0	37	85	6	0	7	5.99146461486816	49	664
1339	2270	0	0	14	27	13	13	414980	1	0	0	0	0	0	1	0	0	0	0	0	0	0	1	1	0	808	0	39	106	1	1	7	6.69456195831299	49	664
1340	2271	0	0	12	24	7	7	363070	1	0	0	0	0	0	1	0	0	0	0	0	0	0	0	0	0	460	0	27	NA	6	0	6	6.13122653961182	36	664
1341	2272	0	0	17	32	18	12	361010	1	0	0	0	0	0	1	0	0	0	0	0	0	0	0	0	0	642	0	45	120	1	0	9	6.4645881652832	81	664
1342	2273	0	0	12	28	8	8	373482	1	0	0	0	0	0	1	0	0	0	0	0	0	0	0	0	0	519	0	28	107	1	1	10	6.25190401077271	100	664
1343	2275	0	0	12	24	10	12	337974	1	0	0	0	0	0	1	0	0	0	0	0	0	0	1	0	1	568	0	32	109	1	0	6	6.34212160110474	36	664
1344	2276	0	0	16	24	10	12	337974	1	0	0	0	0	0	1	0	0	0	0	0	0	0	0	0	1	693	0	28	NA	6	1	2	6.54102993011475	4	664
1345	2278	0	0	12	31	8	12	487904	0	1	0	0	0	0	1	0	0	0	0	0	0	0	1	0	1	978	0	49	106	6	1	13	6.8855094909668	169	664
1346	2279	0	0	12	32	12	8	361010	1	0	0	0	0	0	1	0	0	0	0	0	0	0	0	0	0	779	0	34	106	1	0	14	6.65801095962524	196	664
1347	2280	0	0	14	27	8	9	347666	1	0	0	0	0	0	1	0	0	0	0	0	0	0	1	0	1	443	0	32	95	1	0	7	6.0935697555542	49	664
1348	2283	0	0	16	33	9	12	352463	1	0	0	0	0	1	0	0	0	0	0	0	0	0	1	0	0	692	0	39	105	1	1	11	6.53958606719971	121	663
1349	2284	0	0	16	26	12	12	364640	1	0	0	0	0	1	0	0	0	0	0	0	0	0	0	0	0	417	0	44	131	6	1	4	6.03308629989624	16	663
1350	2286	0	0	11	30	8	12	542115	1	0	0	0	0	1	0	0	0	0	0	0	0	0	1	0	0	773	0	32	93	1	0	13	6.65027904510498	169	663
1351	2287	0	0	15	26	NA	8	430739	0	1	0	0	0	1	0	0	0	0	0	0	0	0	1	0	0	400	0	33	88	6	1	5	5.99146461486816	25	663
1352	2292	0	0	12	27	NA	11	347666	0	1	0	0	0	1	0	0	0	0	0	0	0	0	1	0	1	900	0	38	100	1	0	9	6.80239486694336	81	663
1353	2294	0	0	16	31	12	8	454179	1	0	0	0	0	1	0	0	0	0	0	0	0	0	0	0	0	700	0	32	107	1	1	9	6.55108022689819	81	663
1354	2296	0	0	16	24	8	12	337974	1	0	0	0	0	1	0	0	0	0	0	0	0	0	0	0	0	485	0	35	104	1	0	2	6.18414878845215	4	663
1355	2299	0	0	16	29	8	9	111021	1	0	0	0	0	1	0	0	0	0	0	0	0	0	1	0	0	894	0	30	107	1	0	7	6.79570579528809	49	663
1356	2300	0	0	18	29	NA	NA	111021	1	0	0	0	0	1	0	0	0	0	0	0	0	0	1	0	0	750	0	42	126	1	1	5	6.62007331848145	25	663
1357	2301	1	0	13	33	NA	8	352463	1	0	0	0	0	1	0	0	0	0	0	0	0	0	0	0	0	1055	0	47	109	1	1	14	6.96129608154297	196	663
1358	2302	1	0	12	28	10	NA	364640	1	0	0	0	0	1	0	0	0	0	0	0	0	0	0	0	0	933	0	42	112	1	1	10	6.8384051322937	100	663
1359	2303	1	0	12	26	10	12	364640	1	0	0	0	0	1	0	0	0	0	0	0	0	0	0	0	0	568	0	22	105	1	1	8	6.34212160110474	64	663
1360	2304	1	0	16	25	8	12	354474	1	0	0	0	0	1	0	0	0	0	0	0	0	0	1	0	0	987	1	36	133	1	1	3	6.89467000961304	9	663
1361	2305	1	0	16	24	8	12	354474	1	0	0	0	0	1	0	0	0	0	0	0	0	0	1	0	0	769	0	36	NA	1	1	2	6.64509105682373	4	663
1362	2306	1	0	12	27	8	12	414980	1	0	0	0	0	1	0	0	0	0	0	0	0	0	0	0	0	648	1	33	114	1	0	9	6.47389078140259	81	663
1363	2307	1	0	16	30	12	14	487904	1	0	0	0	0	1	0	0	0	0	0	0	0	0	0	0	0	449	0	38	99	6	0	8	6.10702276229858	64	663
1364	2309	1	0	12	27	10	12	347666	1	0	0	0	0	1	0	0	0	0	0	0	0	0	0	0	0	580	0	25	114	1	0	9	6.36302804946899	81	663
1365	2310	1	0	8	33	7	10	401122	1	0	0	0	0	1	0	0	0	0	0	0	0	0	0	0	0	550	0	34	NA	1	0	19	6.30991840362549	361	663
1366	2314	0	0	12	29	9	12	476353	1	0	0	0	0	1	0	0	0	0	0	0	0	0	1	0	1	800	0	35	123	1	1	11	6.68461179733276	121	663
1367	2315	0	0	12	24	12	12	354474	0	0	1	0	0	1	0	0	0	0	0	0	0	0	1	0	1	160	0	34	83	6	1	6	5.07517385482788	36	663
1368	2317	0	0	17	28	16	17	364640	1	0	0	0	0	1	0	0	0	0	0	0	0	0	1	0	1	462	0	42	NA	1	1	5	6.13556480407715	25	663
1369	2318	0	0	14	25	12	12	363070	1	0	0	0	0	1	0	0	0	0	0	0	0	0	1	0	1	425	0	46	NA	1	1	5	6.05208921432495	25	663
1370	2319	0	0	8	32	8	12	361010	1	0	0	0	0	1	0	0	0	0	0	0	0	0	1	0	1	600	0	39	NA	1	0	18	6.39692974090576	324	663
1371	2322	0	0	17	26	12	12	373482	1	0	0	0	0	1	0	0	0	0	0	0	0	0	1	0	1	866	0	37	127	4	1	3	6.76388502120972	9	663
1372	2323	0	0	12	28	NA	10	386295	1	0	0	0	0	1	0	0	0	0	0	0	0	0	1	0	1	683	0	49	87	1	1	10	6.5264949798584	100	663
1373	2324	0	0	12	27	12	11	347666	1	0	0	0	0	1	0	0	0	0	0	0	0	0	1	0	1	1115	0	48	100	1	1	9	7.01660966873169	81	663
1374	2325	0	0	12	26	12	11	347666	1	0	0	0	0	1	0	0	0	0	0	0	0	0	1	0	1	1100	0	48	104	1	1	8	7.00306558609009	64	663
1375	2326	0	0	12	24	12	11	337974	1	0	0	0	0	1	0	0	0	0	0	0	0	0	0	0	1	286	0	49	106	1	1	6	5.65599203109741	36	663
1376	2327	0	0	14	28	12	12	373482	1	0	0	0	0	1	0	0	0	0	0	0	0	0	1	0	1	513	0	46	127	1	1	8	6.24027585983276	64	663
1377	2328	0	0	13	26	12	12	373482	1	0	0	0	0	1	0	0	0	0	0	0	0	0	1	0	1	650	1	52	109	1	1	7	6.47697257995605	49	663
1378	2329	0	0	12	31	12	9	454179	1	0	0	0	0	1	0	0	0	0	0	0	0	0	1	0	1	1039	0	48	85	1	1	13	6.94601392745972	169	663
1379	2330	0	0	12	26	12	9	347666	1	0	0	0	0	1	0	0	0	0	0	0	0	0	1	0	1	700	0	46	93	1	1	8	6.55108022689819	64	663
1380	2333	0	1	18	31	12	12	476353	1	0	0	0	0	0	1	0	0	0	0	0	0	0	1	0	0	315	0	30	NA	6	1	7	5.75257253646851	49	664
1381	2336	0	1	12	33	7	8	361010	1	0	0	0	0	0	1	0	0	0	0	0	0	0	0	0	0	310	0	40	100	1	1	15	5.736572265625	225	664
1382	2338	0	1	11	27	NA	NA	373482	0	0	0	0	0	0	1	0	0	0	0	0	0	0	0	0	0	335	0	37	NA	1	0	10	5.8141303062439	100	664
1383	2339	0	1	11	25	NA	NA	363070	0	0	0	0	0	0	1	0	0	0	0	0	0	0	0	0	0	518	0	20	71	1	0	8	6.24997520446777	64	664
1384	2340	0	1	16	28	12	12	373482	1	0	0	0	0	0	1	0	0	0	0	0	0	0	1	0	0	709	0	36	88	6	0	6	6.56385564804077	36	664
1385	2342	0	1	12	25	8	12	337974	1	0	0	0	0	0	1	0	0	0	0	0	0	0	0	0	0	623	0	32	93	1	0	7	6.43454647064209	49	664
1386	2343	0	1	13	28	8	12	347666	1	0	0	0	0	0	1	0	0	0	0	0	0	0	0	0	0	298	0	26	98	1	0	9	5.69709348678589	81	664
1387	2345	0	1	14	24	10	12	337974	1	0	0	0	0	0	1	0	0	0	0	0	0	0	1	0	0	625	0	35	110	1	1	4	6.43775177001953	16	664
1388	2347	0	1	16	29	8	12	504643	1	0	0	0	0	0	1	0	0	0	0	0	0	0	1	0	0	769	0	37	113	1	0	7	6.64509105682373	49	664
1389	2348	0	1	16	28	8	8	347666	1	0	0	0	0	0	1	0	0	0	0	0	0	0	1	0	0	459	0	40	136	6	1	6	6.12905025482178	36	664
1390	2350	1	1	12	31	6	NA	476353	1	0	0	0	0	0	1	0	0	0	0	0	0	0	0	0	0	550	0	31	109	1	0	13	6.30991840362549	169	664
1391	2352	1	1	14	29	12	11	476353	1	0	0	0	0	0	1	0	0	0	0	0	0	0	0	0	0	470	0	38	94	1	1	9	6.15273284912109	81	664
1392	2353	1	1	12	33	8	8	391625	1	0	0	0	0	0	1	0	0	0	0	0	0	0	0	0	0	396	0	36	77	1	0	15	5.98141431808472	225	664
1393	2354	1	1	14	25	12	12	708947	1	0	0	0	0	0	1	0	0	0	0	0	0	0	0	0	0	594	0	33	NA	1	1	5	6.38687944412231	25	664
1394	2356	1	1	16	28	18	15	729279	1	0	0	0	0	0	1	0	0	0	0	0	0	0	0	0	0	1039	0	49	113	6	1	6	6.94601392745972	36	664
1395	2358	1	1	12	34	8	8	352463	1	0	0	0	0	0	1	0	0	0	0	0	0	0	1	0	0	400	0	36	NA	1	1	16	5.99146461486816	256	664
1396	2360	1	1	12	26	11	12	364640	1	0	0	0	0	0	1	0	0	0	0	0	0	0	0	0	0	698	1	34	125	1	NA	8	6.54821920394897	64	664
1397	2362	1	1	16	26	8	13	347666	1	0	0	0	0	0	1	0	0	0	0	0	0	0	0	1	0	713	0	27	106	1	1	4	6.56948137283325	16	664
1398	2363	1	1	12	24	8	11	337974	1	0	0	0	0	0	1	0	0	0	0	0	0	0	0	0	0	550	0	33	NA	1	1	6	6.30991840362549	36	664
1399	2366	1	1	14	27	8	14	347666	1	0	0	0	0	0	1	0	0	0	0	0	0	0	0	0	0	333	0	37	108	1	1	7	5.80814266204834	49	664
1400	2368	0	1	12	29	12	12	476353	1	0	0	0	0	1	0	0	0	0	0	0	0	0	1	0	1	1058	0	29	NA	1	0	11	6.96413564682007	121	663
1401	2369	0	1	11	30	NA	NA	476353	1	0	0	0	0	1	0	0	0	0	0	0	0	0	1	0	1	590	0	35	89	1	0	13	6.38012266159058	169	663
1402	2370	0	1	12	24	NA	NA	354474	1	0	0	0	0	1	0	0	0	0	0	0	0	0	1	0	1	633	0	39	NA	1	1	6	6.45047044754028	36	663
1403	2371	0	1	10	26	NA	NA	364640	1	0	0	0	0	1	0	0	0	0	0	0	0	0	1	0	1	500	0	24	84	2	1	10	6.21460819244385	100	663
1404	2372	0	1	14	28	12	12	364640	1	0	0	0	0	1	0	0	0	0	0	0	0	0	1	0	1	788	0	37	NA	1	1	8	6.66949796676636	64	663
1405	2375	0	1	18	31	13	12	454179	1	0	0	0	0	1	0	0	0	0	0	0	0	0	1	0	1	832	0	50	NA	1	1	7	6.72383260726929	49	663
1406	2377	0	1	12	26	6	12	347666	1	0	0	0	0	1	0	0	0	0	0	0	0	0	1	0	1	539	0	44	102	1	0	8	6.28971576690674	64	663
1407	2379	0	1	18	28	8	12	383527	1	0	0	0	0	0	0	0	0	1	0	0	1	0	1	0	0	577	0	44	106	1	1	4	6.35784244537354	16	667
1408	2381	0	1	14	30	12	12	1113393	1	0	0	0	0	0	0	0	0	1	0	0	1	0	1	0	1	808	0	40	102	1	1	10	6.69456195831299	100	667
1409	2382	0	1	14	30	14	16	1113393	1	0	0	0	0	0	0	0	0	1	0	0	1	0	1	0	1	722	0	49	113	1	1	10	6.58202505111694	100	667
1410	2383	0	1	12	26	12	12	383527	1	0	0	0	0	0	0	0	0	1	0	0	1	0	1	1	1	600	0	26	96	1	1	8	6.39692974090576	64	667
1411	2387	0	1	10	28	8	6	378045	1	0	0	0	0	0	0	0	0	1	0	0	1	0	1	1	1	452	0	22	NA	1	0	12	6.11368227005005	144	667
1412	2388	0	1	7	27	4	8	378045	1	0	0	0	0	0	0	0	0	1	0	0	1	0	1	1	1	300	0	30	NA	1	0	14	5.70378255844116	196	667
1413	2391	0	1	12	26	NA	10	88672	0	1	0	0	0	0	0	0	0	1	0	0	1	1	1	1	1	393	0	24	NA	6	0	8	5.97380971908569	64	667
1414	2393	1	1	12	26	NA	7	88672	0	1	0	0	0	0	0	1	0	0	0	0	1	1	1	1	1	200	0	NA	NA	6	0	8	5.29831743240356	64	665
1415	2398	1	1	9	33	NA	7	107097	1	0	0	0	0	0	0	1	0	0	0	0	1	0	0	1	1	750	0	51	NA	1	1	18	6.62007331848145	324	665
1416	2399	1	1	16	26	12	12	426142	1	0	0	0	0	0	0	1	0	0	0	0	1	0	0	1	1	673	0	31	107	6	1	4	6.51174545288086	16	665
1417	2402	1	1	14	30	12	14	1002054	0	1	0	0	0	0	0	1	0	0	0	0	1	0	1	1	1	989	0	38	NA	1	0	10	6.89669418334961	100	665
1418	2404	1	1	17	27	12	14	383527	1	0	0	0	0	0	0	1	0	0	0	0	1	0	1	1	1	880	0	49	110	6	0	4	6.7799220085144	16	665
1419	2406	1	1	13	26	12	12	383527	1	0	0	0	0	0	0	1	0	0	0	0	1	0	0	1	1	905	0	35	106	1	1	7	6.80793476104736	49	665
1420	2408	1	1	14	34	NA	10	577458	0	1	0	0	0	0	0	0	0	1	0	0	1	1	1	1	1	250	0	37	NA	1	1	14	5.52146100997925	196	667
1421	2409	1	1	10	28	5	12	383527	1	0	0	0	0	0	0	0	0	1	0	0	1	0	1	1	1	520	0	38	103	1	0	12	6.25382900238037	144	667
1422	2410	1	1	12	27	5	12	383527	1	0	0	0	0	0	0	0	0	1	0	0	1	0	1	1	1	356	0	20	53	6	0	9	5.87493085861206	81	667
1423	2411	1	1	12	24	5	12	372835	1	0	0	0	0	0	0	0	0	1	0	0	1	0	1	1	1	278	0	24	103	1	0	6	5.62762117385864	36	667
1424	2412	1	1	12	25	11	11	86498	1	0	0	0	0	0	0	0	0	1	0	0	1	1	1	1	1	400	0	16	76	2	0	7	5.99146461486816	49	667
1425	2415	1	1	10	28	NA	8	88672	0	1	0	0	0	0	0	0	0	1	0	0	1	1	1	1	1	273	0	36	90	1	1	12	5.60947179794312	144	667
1426	2417	1	1	11	31	7	12	501027	1	0	0	0	0	0	0	0	0	1	0	0	1	0	1	1	1	500	0	31	96	1	1	14	6.21460819244385	196	667
1427	2418	1	1	11	33	6	12	370720	1	0	0	0	0	0	0	0	0	1	0	0	1	0	1	1	1	603	0	35	97	1	1	16	6.40191698074341	256	667
1428	2419	0	1	12	25	9	11	372835	1	0	0	0	0	0	0	0	0	1	0	0	1	0	1	1	1	400	0	26	NA	5	1	7	5.99146461486816	49	667
1429	2422	0	1	12	28	NA	10	88672	0	1	0	0	0	0	0	0	0	1	0	0	1	1	1	1	1	475	0	35	87	5	1	10	6.16331481933594	100	667
1430	2424	0	1	12	33	NA	15	370720	1	0	0	0	0	0	0	0	0	1	0	0	1	0	1	1	1	1100	0	39	89	1	1	15	7.00306558609009	225	667
1431	2427	0	1	14	26	12	12	383527	1	0	0	0	0	0	0	0	0	1	0	0	1	0	1	1	1	337	1	44	118	6	1	6	5.8200831413269	36	667
1432	2429	0	1	11	27	16	12	426142	0	1	0	0	0	0	0	0	0	1	0	0	1	0	1	1	1	538	0	46	NA	1	1	10	6.28785848617554	100	667
1433	2431	0	1	13	26	NA	8	104794	0	1	0	0	0	0	0	0	0	1	0	0	1	1	1	1	1	404	0	28	70	1	1	7	6.00141477584839	49	667
1434	2432	0	1	16	27	17	16	383527	1	0	0	0	0	0	0	0	0	1	0	0	1	0	1	1	1	757	0	34	104	1	1	5	6.62936305999756	25	667
1435	2433	0	1	16	33	18	16	370720	1	0	0	0	0	0	0	0	0	1	0	0	1	0	1	1	1	554	0	36	113	1	1	11	6.3171648979187	121	667
1436	2435	0	1	16	29	12	11	501027	1	0	0	0	0	0	0	0	0	1	0	0	1	0	1	1	0	577	0	36	116	1	1	7	6.35784244537354	49	667
1437	2436	0	1	15	26	12	10	383527	1	0	0	0	0	0	0	0	0	1	0	0	1	0	1	1	1	432	0	36	114	1	1	5	6.06842565536499	25	667
1438	2438	0	1	11	29	5	12	501027	1	0	0	0	0	0	0	0	0	1	0	0	1	0	1	1	1	550	0	33	NA	1	0	12	6.30991840362549	144	667
1439	2439	0	1	16	24	16	12	414261	1	0	0	0	0	0	0	0	0	1	0	0	1	0	1	1	1	797	0	41	NA	1	1	2	6.68085479736328	4	667
1440	2440	0	1	14	27	16	14	383527	1	0	0	0	0	0	0	0	0	1	0	0	1	0	1	1	1	450	0	29	116	6	1	7	6.10924768447876	49	667
1441	2441	0	1	13	29	10	11	501027	1	0	0	0	0	0	0	0	0	1	0	0	1	0	1	1	1	807	0	43	109	1	1	10	6.69332361221313	100	667
1442	2442	0	1	13	24	10	11	372835	1	0	0	0	0	0	0	0	0	1	0	0	1	0	1	1	1	600	0	31	NA	1	1	5	6.39692974090576	25	667
1443	2444	0	1	13	34	6	6	365421	1	0	0	0	0	0	0	0	0	1	0	0	1	0	1	1	1	933	0	35	NA	1	1	15	6.8384051322937	225	667
1444	2445	0	1	11	33	NA	10	365421	1	0	0	0	0	0	0	0	0	1	0	0	1	0	0	1	1	481	0	29	80	1	0	16	6.17586708068848	256	667
1445	2446	1	1	12	29	9	8	501027	1	0	0	0	0	0	0	0	1	0	0	0	1	0	1	1	1	623	0	20	NA	1	0	11	6.43454647064209	121	666
1446	2450	1	1	10	27	4	11	88672	1	0	0	0	0	0	0	0	1	0	0	0	1	1	1	1	1	328	0	14	NA	1	1	11	5.79301357269287	121	666
1447	2451	1	1	16	26	6	8	93751	1	0	0	0	0	0	0	0	1	0	0	0	1	0	1	1	1	600	0	40	116	1	1	4	6.39692974090576	16	666
1448	2457	1	1	14	27	5	8	88672	1	0	0	0	0	0	0	0	1	0	0	0	1	1	1	1	1	693	0	32	83	1	1	7	6.54102993011475	49	666
1449	2460	1	1	15	33	12	12	90620	1	0	0	0	0	0	0	0	1	0	0	0	1	0	1	1	1	923	0	47	104	1	1	12	6.82762908935547	144	666
1450	2461	1	1	12	28	12	12	93751	1	0	0	0	0	0	0	0	1	0	0	0	1	0	1	1	1	721	0	42	106	1	1	10	6.58063936233521	100	666
1451	2462	1	1	12	25	12	9	86498	1	0	0	0	0	0	0	0	1	0	0	0	1	1	1	1	1	540	0	26	99	1	1	7	6.29156923294067	49	666
1452	2463	1	1	13	27	12	9	88672	1	0	0	0	0	0	0	0	1	0	0	0	1	1	1	1	1	459	1	37	101	1	0	8	6.12905025482178	64	666
1453	2464	1	1	13	27	11	11	88672	1	0	0	0	0	0	0	0	1	0	0	0	1	1	1	1	1	485	1	38	74	6	1	8	6.18414878845215	64	666
1454	2466	1	1	12	25	NA	11	86498	0	1	0	0	0	0	0	0	1	0	0	0	1	1	1	1	1	350	0	24	NA	6	0	7	5.85793304443359	49	666
1455	2468	1	1	16	25	18	16	372835	1	0	0	0	0	0	0	0	1	0	0	0	1	0	1	1	1	200	1	30	121	6	1	3	5.29831743240356	9	666
1456	2470	1	1	10	30	3	NA	134310	1	0	0	0	0	0	0	0	1	0	0	0	1	1	1	1	1	520	0	30	NA	1	0	14	6.25382900238037	196	666
1457	2473	1	1	12	25	6	12	86507	1	0	0	0	0	0	0	0	1	0	0	0	1	1	1	1	1	250	0	26	NA	4	0	7	5.52146100997925	49	666
1458	2475	1	1	11	28	NA	NA	88672	0	0	0	0	0	0	0	0	1	0	0	0	1	1	1	0	1	504	0	22	NA	1	0	11	6.22257614135742	121	666
1459	2477	1	1	12	28	9	8	88672	0	0	0	0	0	0	0	0	1	0	0	0	1	1	1	1	1	363	1	21	77	1	1	10	5.89440298080444	100	666
1460	2478	1	1	11	33	NA	NA	127041	0	0	0	0	0	0	0	0	1	0	0	0	1	1	1	1	1	654	0	23	NA	1	0	16	6.4831075668335	256	666
1461	2479	1	1	12	32	5	NA	127041	1	0	0	0	0	0	0	0	1	0	0	0	1	1	1	1	1	425	0	24	NA	1	0	14	6.05208921432495	196	666
1462	2480	1	1	12	31	NA	NA	134296	0	0	0	0	0	0	0	0	1	0	0	0	1	1	1	1	1	245	0	26	NA	4	0	13	5.5012583732605	169	666
1463	2481	1	1	11	25	NA	8	86498	0	0	0	0	0	0	0	0	1	0	0	0	1	1	1	1	1	250	0	21	NA	6	1	8	5.52146100997925	64	666
1464	2483	1	1	13	32	0	NA	370720	0	0	0	0	0	0	0	0	1	0	0	0	1	0	1	0	1	879	0	40	NA	1	0	13	6.77878475189209	169	666
1465	2486	1	1	12	26	6	6	88672	1	0	0	0	0	0	0	0	1	0	0	0	1	1	1	1	1	687	0	18	93	1	0	8	6.53233432769775	64	666
1466	2487	1	1	11	32	NA	NA	127041	0	0	0	0	0	0	0	0	1	0	0	0	1	1	1	1	1	402	0	26	NA	1	0	15	5.99645185470581	225	666
1467	2488	1	1	12	31	6	NA	134296	0	0	0	0	0	0	0	0	1	0	0	0	1	1	1	1	1	428	0	32	NA	4	0	13	6.05912303924561	169	666
1468	2489	1	1	13	24	10	12	372835	1	0	0	0	0	0	0	0	1	0	0	0	1	0	1	1	1	325	0	37	114	4	1	5	5.78382539749146	25	666
1469	2492	1	1	17	27	16	12	383527	1	0	0	0	0	0	0	0	1	0	0	0	1	0	1	1	1	725	0	40	103	5	0	4	6.58617162704468	16	666
1470	2493	1	1	12	25	3	8	89835	1	0	0	0	0	0	0	0	1	0	0	0	1	0	1	1	1	780	0	34	NA	1	1	7	6.65929412841797	49	666
1471	2499	0	1	14	27	NA	8	362750	0	1	0	0	0	0	0	0	0	1	0	0	1	1	1	1	1	264	0	38	NA	1	1	7	5.57594919204712	49	667
1472	2500	0	1	12	32	6	9	577458	1	0	0	0	0	0	0	0	0	1	0	0	1	1	1	1	1	450	0	43	92	4	1	14	6.10924768447876	196	667
1473	2501	0	1	14	27	8	8	88672	1	0	0	0	0	0	0	0	0	1	0	0	1	1	1	1	1	346	0	33	NA	4	1	7	5.84643888473511	49	667
1474	2502	0	1	13	24	6	3	86498	1	0	0	0	0	0	0	0	0	1	0	0	1	1	1	1	1	350	0	21	79	6	1	5	5.85793304443359	25	667
1475	2503	0	1	13	24	10	13	86498	1	0	0	0	0	0	0	0	0	1	0	0	1	1	1	1	1	400	0	24	NA	6	1	5	5.99146461486816	25	667
1476	2504	0	1	12	32	2	6	107097	1	0	0	0	0	0	0	0	0	1	0	0	1	0	1	1	1	980	0	34	92	1	1	14	6.8875527381897	196	667
1477	2505	0	1	12	29	NA	5	134296	0	1	0	0	0	0	0	0	0	1	0	0	1	1	1	1	1	385	0	36	NA	1	1	11	5.95324325561523	121	667
1478	2507	0	1	17	28	NA	11	88672	0	1	0	0	0	0	0	0	0	1	0	0	1	1	1	0	1	344	0	35	NA	6	1	5	5.84064149856567	25	667
1479	2509	0	1	16	25	7	9	86498	1	0	0	0	0	0	0	0	0	1	0	0	1	1	1	1	1	563	0	NA	99	6	1	3	6.33327960968018	9	667
1480	2510	0	1	7	29	12	12	144741	1	0	0	0	0	0	0	0	0	1	0	0	1	0	1	1	1	463	0	28	NA	1	1	16	6.1377272605896	256	667
1481	2511	0	1	12	28	NA	NA	104794	0	0	0	0	0	0	0	0	0	1	0	0	1	1	1	1	0	565	0	20	NA	6	0	10	6.33682584762573	100	667
1482	2512	0	1	12	27	5	9	104794	1	0	0	0	0	0	0	0	0	1	0	0	1	1	1	1	1	638	0	28	NA	1	1	9	6.45833826065063	81	667
1483	2513	0	1	10	30	NA	5	134296	0	1	0	0	0	0	0	0	0	1	0	0	1	1	1	1	1	462	0	29	NA	1	0	14	6.13556480407715	196	667
1484	2514	0	1	13	27	NA	NA	88672	0	0	0	0	0	0	0	0	0	1	0	0	1	1	1	1	1	670	1	35	99	1	1	8	6.5072774887085	64	667
1485	2515	0	1	13	24	NA	NA	86498	0	0	0	0	0	0	0	0	0	1	0	0	1	1	1	1	1	404	0	26	NA	6	1	5	6.00141477584839	25	667
1486	2516	0	1	17	25	11	9	86498	1	0	0	0	0	0	0	0	0	1	0	0	1	1	1	1	1	373	1	33	116	5	1	2	5.9215784072876	4	667
1487	2517	0	1	12	24	NA	NA	86498	0	0	0	0	0	0	0	0	0	1	0	0	1	1	1	1	1	230	0	20	NA	6	1	6	5.43807935714722	36	667
1488	2518	0	1	12	32	NA	NA	127041	0	0	0	0	0	0	0	0	0	1	0	0	1	1	1	1	1	558	0	40	NA	5	0	14	6.32435894012451	196	667
1489	2519	0	1	8	29	6	7	134296	1	0	0	0	0	0	0	0	0	1	0	0	1	1	1	1	1	300	0	18	NA	1	0	15	5.70378255844116	225	667
1490	2520	0	1	14	29	NA	12	501027	0	1	0	0	0	0	0	0	0	1	0	0	1	0	1	1	1	913	0	40	NA	1	1	9	6.81673574447632	81	667
1491	2522	0	1	18	27	12	8	383527	1	0	0	0	0	0	0	0	0	1	0	0	1	0	1	1	1	558	0	41	98	1	1	3	6.32435894012451	9	667
1492	2523	0	1	13	33	NA	12	370720	0	0	1	0	0	0	0	0	0	1	0	0	1	0	1	1	1	529	0	48	114	1	1	14	6.27098846435547	196	667
1493	2524	0	1	15	26	5	7	93751	1	0	0	0	0	0	0	0	0	1	0	0	1	0	1	1	1	330	0	45	NA	6	1	5	5.7990927696228	25	667
1494	2526	0	1	9	26	13	11	93751	1	0	0	0	0	0	0	0	0	1	0	0	1	0	1	1	1	375	0	28	NA	1	1	11	5.92692613601685	121	667
1495	2527	0	1	13	24	13	11	91137	1	0	0	0	0	0	0	0	0	1	0	0	1	0	1	1	1	615	0	25	NA	1	0	5	6.42162227630615	25	667
1496	2528	0	1	14	27	12	12	426142	1	0	0	0	0	0	0	1	0	0	0	0	1	0	0	1	1	721	0	34	119	1	1	7	6.58063936233521	49	665
1497	2529	0	1	16	25	12	12	414261	1	0	0	0	0	0	0	1	0	0	0	0	1	0	1	0	1	529	1	40	122	4	1	3	6.27098846435547	9	665
1498	2531	0	1	12	34	6	12	127041	1	0	0	0	0	0	0	1	0	0	0	0	1	1	1	1	1	859	0	42	77	1	0	16	6.75576877593994	256	665
1499	2532	0	1	14	27	16	11	88672	1	0	0	0	0	0	0	1	0	0	0	0	1	1	1	1	1	649	0	35	NA	1	1	7	6.47543287277222	49	665
1500	2533	0	1	10	24	16	11	86498	1	0	0	0	0	0	0	1	0	0	0	0	1	1	1	1	1	238	0	26	NA	1	1	8	5.47227048873901	64	665
1501	2534	0	1	12	34	8	6	150139	1	0	0	0	0	0	0	1	0	0	0	0	1	1	1	1	1	275	0	37	95	1	0	16	5.61677122116089	256	665
1502	2536	0	1	14	26	NA	13	88672	0	1	0	0	0	0	0	1	0	0	0	0	1	1	1	1	1	325	0	24	89	1	1	6	5.78382539749146	36	665
1503	2537	0	1	14	29	NA	16	134296	0	1	0	0	0	0	0	1	0	0	0	0	1	1	1	0	1	357	0	44	93	5	1	9	5.87773561477661	81	665
1504	2538	0	1	12	30	NA	10	134296	0	1	0	0	0	0	0	1	0	0	0	0	1	1	1	1	1	385	0	35	NA	1	0	12	5.95324325561523	144	665
1505	2540	0	1	14	24	12	15	372835	1	0	0	0	0	0	0	1	0	0	0	0	1	0	1	1	1	365	0	25	116	1	1	4	5.89989757537842	16	665
1506	2542	0	1	8	33	6	4	406024	1	0	0	0	0	0	0	1	0	0	0	0	1	0	1	1	1	800	0	30	NA	1	0	19	6.68461179733276	361	665
1507	2543	0	1	12	34	5	12	406024	1	0	0	0	0	0	0	1	0	0	0	0	1	0	1	1	1	482	0	37	110	1	1	16	6.17794418334961	256	665
1508	2544	0	1	17	29	12	8	493866	1	0	0	0	0	0	0	1	0	0	0	0	1	0	1	1	0	955	0	39	132	1	1	6	6.8617115020752	36	665
1509	2545	0	1	17	26	7	12	378045	1	0	0	0	0	0	0	1	0	0	0	0	1	0	1	1	1	462	0	32	103	1	0	3	6.13556480407715	9	665
1510	2546	0	1	16	28	2	8	378045	1	0	0	0	0	0	0	1	0	0	0	0	1	0	0	1	1	417	0	37	112	1	0	6	6.03308629989624	36	665
1511	2548	0	1	10	25	2	8	367506	1	0	0	0	0	0	0	1	0	0	0	0	1	0	1	1	1	290	0	23	NA	1	0	9	5.66988086700439	81	665
1512	2549	0	1	12	24	12	12	367506	0	0	1	0	0	0	0	1	0	0	0	0	1	0	1	1	1	240	0	36	NA	1	1	6	5.48063898086548	36	665
1513	2552	0	1	12	31	NA	NA	610498	0	0	0	0	0	0	0	1	0	0	0	0	1	1	1	1	1	829	0	30	NA	1	0	13	6.72022008895874	169	665
1514	2558	0	1	12	32	12	12	370720	1	0	0	0	0	0	0	1	0	0	0	0	1	0	1	1	1	361	0	42	99	1	1	14	5.88887786865234	196	665
1515	2561	0	1	16	28	11	12	383527	1	0	0	0	0	0	0	1	0	0	0	0	1	0	0	1	1	598	0	46	138	1	1	6	6.39359092712402	36	665
1516	2562	0	1	13	25	7	10	372835	1	0	0	0	0	0	0	1	0	0	0	0	1	0	1	1	1	750	1	29	93	1	1	6	6.62007331848145	36	665
1517	2563	0	1	16	25	12	11	353857	1	0	0	0	0	0	0	1	0	0	0	0	1	1	1	1	1	385	0	28	88	6	0	3	5.95324325561523	9	665
1518	2564	0	1	16	28	NA	10	88672	0	1	0	0	0	0	0	1	0	0	0	0	1	1	1	1	1	620	0	26	96	1	1	6	6.4297194480896	36	665
1519	2570	0	1	13	34	14	12	411911	1	0	0	0	0	0	0	1	0	0	0	0	1	0	1	1	1	641	0	45	106	1	1	15	6.46302938461304	225	665
1520	2575	0	1	16	26	12	9	88672	1	0	0	0	0	0	0	1	0	0	0	0	1	1	1	1	1	468	0	33	90	1	0	4	6.14846849441528	16	665
1521	2576	0	1	13	24	12	9	86498	1	0	0	0	0	0	0	1	0	0	0	0	1	1	1	1	1	385	1	29	NA	6	0	5	5.95324325561523	25	665
1522	2578	0	1	12	25	11	12	86498	1	0	0	0	0	0	0	1	0	0	0	0	1	1	1	1	1	462	0	25	93	1	0	7	6.13556480407715	49	665
1523	2579	0	1	12	27	14	10	378045	1	0	0	0	0	0	0	1	0	0	0	0	1	0	1	1	1	635	0	32	92	1	1	9	6.45362520217896	81	665
1524	2580	0	1	12	26	14	10	378045	1	0	0	0	0	0	0	1	0	0	0	0	1	0	0	0	1	400	0	22	101	1	1	8	5.99146461486816	64	665
1525	2581	0	1	13	27	12	10	420051	1	0	0	0	0	0	0	1	0	0	0	0	1	0	1	1	1	760	0	27	100	1	1	8	6.63331842422485	64	665
1526	2583	0	1	13	27	12	10	383527	1	0	0	0	0	0	0	1	0	0	0	0	1	0	1	1	1	560	1	35	91	1	1	8	6.32793664932251	64	665
1527	2584	0	1	12	34	3	NA	370720	1	0	0	0	0	0	0	1	0	0	0	0	1	0	1	1	1	1000	0	48	95	1	1	16	6.90775537490845	256	665
1528	2587	1	1	11	28	6	6	383527	1	0	0	0	0	0	0	0	0	1	0	0	1	0	1	1	1	425	0	24	71	1	0	11	6.05208921432495	121	667
1529	2589	1	1	12	30	NA	9	134296	0	1	0	0	0	0	0	0	0	1	0	0	1	1	1	1	1	411	0	28	89	1	0	12	6.01859331130981	144	667
1530	2591	1	1	11	25	NA	3	91137	0	1	0	0	0	0	0	0	0	1	0	0	1	0	1	1	1	179	0	12	67	1	1	8	5.18738603591919	64	667
1531	2593	1	1	18	32	14	12	370720	1	0	0	0	0	0	0	0	0	1	0	0	1	0	1	1	1	375	0	44	96	1	0	8	5.92692613601685	64	667
1532	2594	1	1	18	28	16	12	383527	1	0	0	0	0	0	0	0	0	1	0	0	1	0	1	1	1	1298	0	45	127	6	1	4	7.16858005523682	16	667
1533	2595	1	1	15	30	8	14	158714	1	0	0	0	0	0	0	0	0	1	0	0	1	1	1	0	1	476	0	40	NA	1	1	9	6.16541767120361	81	667
1534	2596	1	1	16	27	8	8	383527	1	0	0	0	0	0	0	0	0	1	0	0	1	0	1	1	1	775	0	43	114	6	1	5	6.65286302566528	25	667
1535	2597	1	1	12	27	10	10	383527	1	0	0	0	0	0	0	0	0	1	0	0	1	0	1	1	1	714	1	37	112	1	1	9	6.57088279724121	81	667
1536	2600	1	1	10	28	NA	9	88672	0	1	0	0	0	0	0	0	0	1	0	0	1	1	1	1	1	429	0	34	57	4	0	12	6.06145715713501	144	667
1537	2602	1	1	13	24	10	11	86498	0	0	1	0	0	0	0	0	0	1	0	0	1	1	1	1	1	435	0	26	NA	6	1	5	6.07534599304199	25	667
1538	2603	1	1	13	26	NA	7	93751	0	1	0	0	0	0	0	0	0	1	0	0	1	0	1	1	1	875	0	30	102	1	1	7	6.77422380447388	49	667
1539	2604	1	1	14	33	NA	11	127041	0	0	0	0	0	0	0	0	0	1	0	0	1	1	1	1	1	424	0	29	103	5	0	13	6.04973363876343	169	667
1540	2605	1	1	12	25	NA	11	86498	0	1	0	0	0	0	0	0	0	1	0	0	1	1	1	1	1	375	0	34	NA	6	0	7	5.92692613601685	49	667
1541	2606	1	1	12	25	NA	NA	86498	0	0	0	0	0	0	0	0	0	1	0	0	1	1	1	1	1	489	0	23	NA	1	0	7	6.1923623085022	49	667
1542	2607	1	1	15	24	12	7	86498	0	0	1	0	0	0	0	0	0	1	0	0	1	1	1	1	1	462	0	30	102	1	0	3	6.13556480407715	9	667
1543	2608	1	1	12	34	8	NA	577458	1	0	0	0	0	0	0	0	0	1	0	0	1	1	1	1	1	340	0	33	NA	1	0	16	5.82894563674927	256	667
1544	2610	1	1	12	30	NA	12	501027	0	0	1	0	0	0	0	0	0	1	0	0	1	0	1	1	1	581	0	45	NA	1	0	12	6.36475086212158	144	667
1545	2611	1	1	12	27	7	12	383527	1	0	0	0	0	0	0	0	0	1	0	0	1	0	1	1	1	515	0	34	88	1	1	9	6.2441668510437	81	667
1546	2612	1	1	12	25	7	12	372835	1	0	0	0	0	0	0	0	0	1	0	0	1	0	1	1	1	1053	0	32	88	1	1	7	6.95939874649048	49	667
1547	2613	1	1	12	30	10	11	610438	1	0	0	0	0	0	0	0	0	1	0	0	1	1	1	1	1	475	0	26	NA	1	1	12	6.16331481933594	144	667
1548	2618	1	1	18	32	14	9	370720	1	0	0	0	0	0	0	0	0	1	0	0	1	0	1	1	1	1502	0	53	132	1	1	8	7.31455278396606	64	667
1549	2619	1	1	15	33	12	14	411911	1	0	0	0	0	0	0	0	0	1	0	0	1	0	1	0	1	962	0	45	110	4	1	12	6.86901426315308	144	667
1550	2620	1	1	15	30	14	18	134296	1	0	0	0	0	0	0	0	0	1	0	0	1	1	1	1	1	230	0	32	90	4	1	9	5.43807935714722	81	667
1551	2621	1	1	18	29	14	18	134296	1	0	0	0	0	0	0	0	0	1	0	0	1	1	1	1	1	750	0	28	96	1	1	5	6.62007331848145	25	667
1552	2622	1	1	15	26	12	12	88672	1	0	0	0	0	0	0	0	0	1	0	0	1	1	1	1	1	225	0	29	83	1	0	5	5.41610050201416	25	667
1553	2626	1	1	13	26	12	NA	88672	0	0	0	0	0	0	0	0	0	1	0	0	1	1	1	1	1	331	0	32	86	1	1	7	5.8021183013916	49	667
1554	2627	1	1	11	26	NA	NA	88672	0	0	0	0	0	0	0	0	0	1	0	0	1	1	1	1	1	397	0	28	NA	1	0	9	5.98393630981445	81	667
1555	2628	1	1	10	34	10	NA	370720	1	0	0	0	0	0	0	1	0	0	0	0	1	0	1	1	1	750	0	45	94	1	1	18	6.62007331848145	324	665
1556	2629	1	1	12	25	8	12	372835	1	0	0	0	0	0	0	1	0	0	0	0	1	0	1	1	1	450	0	20	86	1	1	7	6.10924768447876	49	665
1557	2633	1	1	13	25	9	7	353857	1	0	0	0	0	0	0	1	0	0	0	0	1	1	1	1	1	865	0	40	110	1	1	6	6.76272964477539	36	665
1558	2634	1	1	8	24	9	10	91137	1	0	0	0	0	0	0	1	0	0	0	0	1	0	1	1	1	535	0	31	NA	6	1	10	6.28226661682129	100	665
1559	2636	1	1	16	27	12	8	383527	1	0	0	0	0	0	0	1	0	0	0	0	1	0	1	0	1	846	0	29	114	1	1	5	6.74051952362061	25	665
1560	2637	1	1	16	26	12	8	383527	1	0	0	0	0	0	0	1	0	0	0	0	1	0	1	0	1	759	0	39	130	6	1	4	6.63200187683105	16	665
1561	2638	1	1	16	24	12	8	372835	1	0	0	0	0	0	0	1	0	0	0	0	1	0	1	1	1	600	0	40	119	6	1	2	6.39692974090576	4	665
1562	2640	1	1	12	34	8	NA	370720	1	0	0	0	0	0	0	1	0	0	0	0	1	0	1	1	1	1030	0	26	94	1	1	16	6.9373140335083	256	665
1563	2642	1	1	14	32	10	8	411911	1	0	0	0	0	0	0	1	0	0	0	0	1	0	1	1	1	876	0	52	125	1	1	12	6.77536630630493	144	665
1564	2645	1	1	12	32	NA	NA	370720	0	0	0	0	0	0	0	1	0	0	0	0	1	0	1	1	1	568	0	44	100	1	0	14	6.34212160110474	196	665
1565	2646	1	1	16	25	14	14	372835	1	0	0	0	0	0	0	1	0	0	0	0	1	0	1	1	1	533	0	27	108	6	1	3	6.27852153778076	9	665
1566	2649	1	1	12	25	10	8	372835	0	0	1	0	0	0	0	1	0	0	0	0	1	0	1	1	1	481	0	38	NA	1	1	7	6.17586708068848	49	665
1567	2652	1	1	12	28	NA	11	88672	0	1	0	0	0	0	0	1	0	0	0	0	1	1	1	1	1	604	1	39	83	1	1	10	6.40357398986816	100	665
1568	2657	1	1	12	27	12	12	426142	0	0	1	0	0	0	0	1	0	0	0	0	1	0	1	1	1	657	0	32	86	1	1	9	6.48768424987793	81	665
1569	2659	1	1	12	31	NA	12	493866	1	0	0	0	0	0	0	1	0	0	0	0	1	0	1	1	1	625	0	36	101	1	0	13	6.43775177001953	169	665
1570	2661	1	1	12	29	NA	10	134296	1	0	0	0	0	0	0	1	0	0	0	0	1	1	1	1	1	280	0	16	70	1	1	11	5.63478946685791	121	665
1571	2665	1	1	10	28	8	7	378045	1	0	0	0	0	0	0	1	0	0	0	0	1	0	1	1	1	500	0	27	75	1	0	12	6.21460819244385	144	665
1572	2666	1	1	12	26	8	7	378045	1	0	0	0	0	0	0	1	0	0	0	0	1	0	1	1	1	535	1	24	105	1	0	8	6.28226661682129	64	665
1573	2667	1	1	10	26	NA	NA	378045	1	0	0	0	0	0	0	1	0	0	0	0	1	0	1	1	1	818	0	28	85	1	0	10	6.706862449646	100	665
1574	2668	1	1	10	34	NA	NA	365421	1	0	0	0	0	0	0	1	0	0	0	0	1	0	1	1	1	624	0	33	NA	1	0	18	6.43615055084229	324	665
1575	2669	1	1	10	28	NA	9	378045	0	1	0	0	0	0	0	1	0	0	0	0	1	0	1	1	1	604	0	36	89	1	0	12	6.40357398986816	144	665
1576	2670	1	1	12	31	12	12	493866	1	0	0	0	0	0	0	1	0	0	0	0	1	0	1	0	1	505	0	25	80	1	1	13	6.22455835342407	169	665
1577	2671	1	1	12	30	12	12	556697	1	0	0	0	0	0	0	1	0	0	0	0	1	0	1	0	1	750	0	20	72	1	0	12	6.62007331848145	144	665
1578	2672	1	1	12	32	11	8	411911	1	0	0	0	0	0	0	1	0	0	0	0	1	0	1	0	1	721	0	43	NA	1	1	14	6.58063936233521	196	665
1579	2673	1	1	18	32	12	12	411911	1	0	0	0	0	0	0	1	0	0	0	0	1	0	1	0	1	674	0	56	115	1	1	8	6.5132303237915	64	665
1580	2674	1	1	16	33	17	12	370720	1	0	0	0	0	0	0	1	0	0	0	0	1	0	1	1	1	913	0	48	115	1	1	11	6.81673574447632	121	665
1581	2675	1	1	17	30	18	18	134296	1	0	0	0	0	0	0	1	0	0	0	0	1	1	1	1	0	879	1	40	102	1	1	7	6.77878475189209	49	665
1582	2677	1	1	12	26	8	13	88672	0	0	1	0	0	0	0	1	0	0	0	0	1	1	1	1	1	427	1	27	NA	1	1	8	6.05678415298462	64	665
1583	2678	1	1	8	24	12	12	86498	1	0	0	0	0	0	0	1	0	0	0	0	1	1	1	1	1	792	0	29	NA	1	1	10	6.67456150054932	100	665
1584	2679	1	1	14	29	10	10	134296	1	0	0	0	0	0	0	1	0	0	0	0	1	1	1	1	1	327	1	44	99	4	1	9	5.7899603843689	81	665
1585	2682	1	1	10	30	NA	NA	158714	0	0	0	0	0	0	0	1	0	0	0	0	1	1	1	1	1	313	0	39	NA	5	0	14	5.74620342254639	196	665
1586	2683	1	1	16	34	14	12	127041	1	0	0	0	0	0	0	1	0	0	0	0	1	1	1	0	1	786	0	34	NA	1	1	12	6.66695690155029	144	665
1587	2686	1	1	18	31	14	12	122473	1	0	0	0	0	0	0	1	0	0	0	0	1	0	1	0	1	337	0	40	107	1	1	7	5.8200831413269	49	665
1588	2687	1	1	10	30	NA	4	134296	0	1	0	0	0	0	0	1	0	0	0	0	1	1	1	1	1	385	0	27	66	6	1	14	5.95324325561523	196	665
1589	2689	1	1	16	27	8	8	88672	1	0	0	0	0	0	0	1	0	0	0	0	1	1	1	1	1	529	0	47	108	5	1	5	6.27098846435547	25	665
1590	2690	1	1	10	33	NA	NA	127041	0	0	0	0	0	0	0	1	0	0	0	0	1	1	0	1	1	429	0	37	NA	1	0	17	6.06145715713501	289	665
1591	2691	1	1	12	27	7	7	383527	1	0	0	0	0	0	0	1	0	0	0	0	1	0	0	0	1	984	0	36	94	2	0	9	6.89162588119507	81	665
1592	2692	1	1	12	34	3	8	370720	1	0	0	0	0	0	0	1	0	0	0	0	1	0	1	1	1	817	0	27	93	6	0	16	6.70563888549805	256	665
1593	2695	1	1	14	32	7	8	127041	1	0	0	0	0	0	0	1	0	0	0	0	1	1	1	1	1	745	0	NA	NA	1	0	12	6.61338424682617	144	665
1594	2697	1	1	10	24	4	0	86498	1	0	0	0	0	0	0	1	0	0	0	0	1	1	1	1	1	345	0	31	NA	6	1	8	5.84354448318481	64	665
1595	2702	1	1	14	34	NA	12	127041	1	0	0	0	0	0	0	1	0	0	0	0	1	1	1	1	1	554	1	43	NA	1	1	14	6.3171648979187	196	665
1596	2707	1	1	13	24	6	12	86498	1	0	0	0	0	0	0	1	0	0	0	0	1	1	1	1	1	263	0	28	85	6	1	5	5.57215404510498	25	665
1597	2708	1	1	18	32	16	16	150139	1	0	0	0	0	0	0	1	0	0	0	0	1	1	1	1	1	745	0	40	99	1	0	8	6.61338424682617	64	665
1598	2710	1	1	17	29	13	13	134296	1	0	0	0	0	0	0	1	0	0	0	0	1	1	1	1	0	673	0	42	NA	6	1	6	6.51174545288086	36	665
1599	2712	1	1	17	32	14	13	127041	1	0	0	0	0	0	0	1	0	0	0	0	1	1	1	1	1	721	0	36	86	5	1	9	6.58063936233521	81	665
1600	2713	1	1	13	30	NA	11	134296	0	1	0	0	0	0	0	1	0	0	0	0	1	1	1	1	1	438	0	34	NA	1	1	11	6.08221912384033	121	665
1601	2721	1	0	12	26	NA	12	88672	0	1	0	0	0	0	0	0	1	0	0	0	1	1	1	1	1	545	0	32	95	1	1	8	6.30078601837158	64	666
1602	2722	1	0	14	25	NA	12	86498	0	1	0	0	0	0	0	0	1	0	0	0	1	1	1	1	1	250	0	NA	114	6	1	5	5.52146100997925	25	666
1603	2723	1	0	14	27	NA	11	88672	0	1	0	0	0	0	0	0	1	0	0	0	1	1	1	1	1	624	0	NA	74	4	1	7	6.43615055084229	49	666
1604	2728	1	0	13	29	8	10	501027	1	0	0	0	0	0	0	0	1	0	0	0	1	0	1	1	1	400	0	36	NA	6	1	10	5.99146461486816	100	666
1605	2729	1	0	16	29	16	16	556697	1	0	0	0	0	0	0	0	1	0	0	0	1	0	1	1	1	577	0	46	128	1	1	7	6.35784244537354	49	666
1606	2730	1	0	16	25	18	18	353857	1	0	0	0	0	0	0	0	1	0	0	0	1	1	1	1	1	813	0	37	111	6	1	3	6.70073127746582	9	666
1607	2731	1	0	12	34	12	11	519712	1	0	0	0	0	0	0	0	1	0	0	0	1	1	1	1	1	625	0	38	101	4	1	16	6.43775177001953	256	666
1608	2732	1	0	14	26	12	11	362750	1	0	0	0	0	0	0	0	1	0	0	0	1	1	1	1	1	485	0	43	111	5	1	6	6.18414878845215	36	666
1609	2733	1	0	16	28	10	12	383527	1	0	0	0	0	0	0	0	1	0	0	0	1	0	1	1	1	841	0	42	92	6	1	6	6.73459148406982	36	666
1610	2734	1	0	16	27	10	12	383527	1	0	0	0	0	0	0	0	1	0	0	0	1	0	1	1	1	865	0	41	100	1	1	5	6.76272964477539	25	666
1611	2735	1	0	16	26	14	12	426142	1	0	0	0	0	0	0	0	1	0	0	0	1	0	1	1	1	325	0	48	123	1	1	4	5.78382539749146	16	666
1612	2736	1	0	14	26	9	10	88672	1	0	0	0	0	0	0	0	1	0	0	0	1	1	1	1	1	477	0	22	69	1	1	6	6.16751670837402	36	666
1613	2737	1	0	16	25	9	10	86498	1	0	0	0	0	0	0	0	1	0	0	0	1	1	1	1	1	250	0	30	79	1	1	3	5.52146100997925	9	666
1614	2739	1	0	12	24	10	9	91137	1	0	0	0	0	0	0	0	1	0	0	0	1	0	1	1	1	500	0	30	NA	6	1	6	6.21460819244385	36	666
1615	2740	0	0	13	25	8	10	372835	1	0	0	0	0	0	0	1	0	0	0	0	1	0	1	1	1	515	1	31	106	6	1	6	6.2441668510437	36	665
1616	2741	0	0	18	28	NA	5	383527	0	1	0	0	0	0	0	1	0	0	0	0	1	0	1	1	1	256	0	27	106	6	1	4	5.5451774597168	16	665
1617	2742	0	0	13	24	NA	5	372835	0	1	0	0	0	0	0	1	0	0	0	0	1	0	1	1	1	718	0	40	115	6	1	5	6.57646942138672	25	665
1618	2743	0	0	18	30	17	13	501027	1	0	0	0	0	0	0	1	0	0	0	0	1	0	1	0	0	796	0	42	NA	1	1	6	6.67959928512573	36	665
1619	2744	0	0	12	25	10	12	367506	1	0	0	0	0	0	0	1	0	0	0	0	1	0	1	1	1	750	0	31	108	1	0	7	6.62007331848145	49	665
1620	2745	0	0	12	24	10	11	86498	1	0	0	0	0	0	0	1	0	0	0	0	1	1	1	1	1	419	0	26	NA	4	0	6	6.03787088394165	36	665
1621	2747	0	0	12	26	NA	NA	88672	0	0	0	0	0	0	0	1	0	0	0	0	1	1	1	1	1	431	0	22	69	1	0	8	6.06610822677612	64	665
1622	2748	0	0	12	25	NA	NA	86498	1	0	0	0	0	0	0	1	0	0	0	0	1	1	1	0	1	425	0	27	86	1	0	7	6.05208921432495	49	665
1623	2749	0	0	12	31	10	11	134296	1	0	0	0	0	0	0	1	0	0	0	0	1	1	1	1	1	220	0	29	76	6	1	13	5.39362764358521	169	665
1624	2750	0	0	13	29	9	9	134296	1	0	0	0	0	0	0	1	0	0	0	0	1	1	1	1	1	685	1	40	115	1	1	10	6.5294189453125	100	665
1625	2751	0	0	15	34	14	12	365421	1	0	0	0	0	0	0	1	0	0	0	0	1	0	1	1	1	500	0	44	104	1	0	13	6.21460819244385	169	665
1626	2754	0	0	16	26	10	12	383527	1	0	0	0	0	0	0	1	0	0	0	0	1	0	1	1	1	551	0	37	115	6	0	4	6.31173467636108	16	665
1627	2755	0	0	11	25	12	12	372835	1	0	0	0	0	0	0	1	0	0	0	0	1	0	1	1	1	700	0	26	93	1	0	8	6.55108022689819	64	665
1628	2757	0	1	12	32	8	8	411911	1	0	0	0	0	0	0	0	1	0	0	0	1	0	1	1	1	707	0	39	91	1	1	14	6.56103086471558	196	666
1629	2761	1	1	17	28	18	14	383527	1	0	0	0	0	0	0	0	0	1	0	0	1	0	1	1	1	523	0	38	125	1	1	5	6.25958156585693	25	667
1630	2762	1	1	12	24	0	3	372835	1	0	0	0	0	0	0	0	0	1	0	0	1	0	1	1	1	433	0	26	NA	1	0	6	6.07073783874512	36	667
1631	2763	1	1	14	25	5	4	372835	1	0	0	0	0	0	0	0	0	1	0	0	1	0	1	1	1	462	1	22	89	1	1	5	6.13556480407715	25	667
1632	2764	1	1	12	24	5	4	372835	1	0	0	0	0	0	0	0	0	1	0	0	1	0	1	1	1	397	0	16	NA	1	1	6	5.98393630981445	36	667
1633	2765	1	1	15	26	9	5	383527	1	0	0	0	0	0	0	0	0	1	0	0	1	0	1	1	1	400	1	26	92	1	1	5	5.99146461486816	25	667
1634	2768	1	1	18	28	14	8	383527	1	0	0	0	0	0	0	0	0	1	0	0	1	0	1	0	1	872	0	28	127	4	1	4	6.7707896232605	16	667
1635	2769	1	1	12	26	7	10	383527	1	0	0	0	0	0	0	0	0	1	0	0	1	0	1	1	1	378	0	38	80	1	1	8	5.93489408493042	64	667
1636	2770	1	1	12	27	5	8	383527	1	0	0	0	0	0	0	0	0	1	0	0	1	0	1	1	1	364	0	24	NA	1	1	9	5.89715385437012	81	667
1637	2772	1	1	15	31	12	10	501027	1	0	0	0	0	0	0	0	0	1	0	0	1	0	1	1	1	962	0	44	NA	1	1	10	6.86901426315308	100	667
1638	2776	1	1	15	30	12	15	501027	1	0	0	0	0	0	0	0	0	1	0	0	1	0	1	1	1	801	0	36	112	4	1	9	6.68586111068726	81	667
1639	2780	1	1	5	32	0	4	730842	1	0	0	0	0	0	0	0	0	1	0	0	1	0	1	1	1	400	0	12	NA	1	0	21	5.99146461486816	441	667
1640	2783	1	1	13	29	NA	12	134296	0	0	0	0	0	0	0	1	0	0	0	0	1	1	1	1	1	540	0	29	NA	4	0	10	6.29156923294067	100	665
1641	2785	1	1	10	30	9	9	556697	1	0	0	0	0	0	0	1	0	0	0	0	1	0	1	1	1	450	0	35	90	1	0	14	6.10924768447876	196	665
1642	2787	1	1	15	27	NA	16	88672	0	1	0	0	0	0	0	1	0	0	0	0	1	1	1	1	1	438	0	34	NA	4	1	6	6.08221912384033	36	665
1643	2790	1	1	12	26	4	9	88672	1	0	0	0	0	0	0	1	0	0	0	0	1	1	1	1	1	360	0	23	84	5	0	8	5.88610410690308	64	665
1644	2791	0	1	12	27	12	12	383527	0	0	1	0	0	0	0	0	1	0	0	0	1	0	1	1	1	529	0	30	NA	1	0	9	6.27098846435547	81	666
1645	2792	0	1	12	26	NA	NA	88672	0	1	0	0	0	0	0	0	1	0	0	0	1	1	1	1	1	721	0	43	120	1	0	8	6.58063936233521	64	666
1646	2793	0	1	2	31	NA	10	556697	0	1	0	0	0	0	0	0	1	0	0	0	1	0	1	1	1	345	0	31	NA	5	0	23	5.84354448318481	529	666
1647	2794	0	1	11	27	NA	NA	426142	1	0	0	0	0	0	0	0	1	0	0	0	1	0	1	0	1	1052	0	41	NA	1	1	10	6.95844841003418	100	666
1648	2796	0	1	16	28	16	NA	383527	1	0	0	0	0	0	0	0	1	0	0	0	1	0	1	1	1	726	0	44	106	6	0	6	6.58755016326904	36	666
1649	2798	0	1	12	33	NA	NA	519712	0	0	0	0	0	0	0	0	1	0	0	0	1	1	1	0	1	543	0	24	76	5	0	15	6.29710912704468	225	666
1650	2799	0	1	16	33	8	6	370720	1	0	0	0	0	0	0	0	1	0	0	0	1	0	1	0	1	1202	0	48	115	1	0	11	7.09174203872681	121	666
1651	2803	0	1	16	24	NA	12	414261	0	1	0	0	0	0	0	0	1	0	0	0	1	0	1	1	1	400	0	33	NA	1	0	2	5.99146461486816	4	666
1652	2805	0	1	9	32	NA	NA	127041	1	0	0	0	0	0	0	0	1	0	0	0	1	1	1	1	1	375	0	32	89	1	0	17	5.92692613601685	289	666
1653	2806	1	1	11	30	NA	NA	158714	0	0	0	0	0	0	0	0	0	1	0	0	1	1	1	1	1	281	0	29	NA	1	0	13	5.63835477828979	169	667
1654	2809	1	1	12	24	NA	10	86498	0	1	0	0	0	0	0	0	0	1	0	0	1	1	1	1	1	127	0	24	NA	5	0	6	4.84418725967407	36	667
1655	2810	1	1	12	32	NA	7	127041	0	1	0	0	0	0	0	0	0	1	0	0	1	1	1	0	1	1393	0	39	102	6	1	14	7.23921489715576	196	667
1656	2813	1	1	12	30	10	9	501027	1	0	0	0	0	0	0	0	0	1	0	0	1	0	0	1	1	649	0	47	104	1	1	12	6.47543287277222	144	667
1657	2815	1	1	16	31	11	8	556697	1	0	0	0	0	0	0	0	0	1	0	0	1	0	1	1	1	420	0	37	NA	5	0	9	6.04025459289551	81	667
1658	2816	1	1	16	27	11	8	426142	1	0	0	0	0	0	0	0	0	1	0	0	1	0	1	1	1	455	0	40	122	1	0	5	6.1202974319458	25	667
1659	2818	1	1	12	25	9	6	86498	1	0	0	0	0	0	0	0	0	1	0	0	1	1	1	1	1	661	0	23	107	1	0	7	6.4937539100647	49	667
1660	2819	0	1	12	24	12	8	372835	1	0	0	0	0	0	0	1	0	0	0	0	1	0	0	1	1	380	0	30	NA	1	0	6	5.94017124176025	36	665
1661	2820	0	1	10	34	NA	NA	577458	0	0	0	0	0	0	0	1	0	0	0	0	1	1	1	1	1	315	0	26	NA	4	0	18	5.75257253646851	324	665
1662	2821	0	1	14	24	NA	NA	372835	1	0	0	0	0	0	0	1	0	0	0	0	1	0	1	1	1	452	0	41	NA	1	1	4	6.11368227005005	16	665
1663	2822	0	1	12	28	12	12	426142	1	0	0	0	0	0	0	1	0	0	0	0	1	0	1	1	1	625	0	42	100	1	1	10	6.43775177001953	100	665
1664	2823	0	1	14	24	8	NA	367506	1	0	0	0	0	0	0	1	0	0	0	0	1	0	1	1	1	601	1	30	NA	6	1	4	6.39859485626221	16	665
1665	2825	0	1	13	27	7	12	378045	1	0	0	0	0	0	0	1	0	0	0	0	1	0	1	1	1	499	0	32	100	1	1	8	6.21260595321655	64	665
1666	2827	0	0	8	31	8	10	548740	1	0	0	0	0	0	0	1	0	0	0	0	1	0	1	1	1	693	0	24	NA	1	0	17	6.54102993011475	289	665
1667	2828	0	1	18	32	15	15	423456	1	0	0	0	0	0	0	1	0	0	0	0	1	0	0	1	0	535	0	40	129	1	1	8	6.28226661682129	64	665
1668	2831	0	1	7	26	1	8	375674	0	1	0	0	0	0	0	1	0	0	0	0	1	0	1	0	0	465	0	24	NA	1	0	13	6.1420373916626	169	665
1669	2832	0	1	12	24	NA	9	365200	0	1	0	0	0	0	0	1	0	0	0	0	1	0	0	1	0	400	0	32	NA	1	1	6	5.99146461486816	36	665
1670	2833	0	1	18	27	17	16	375674	1	0	0	0	0	0	0	1	0	0	0	0	1	0	0	1	0	368	0	40	129	1	1	3	5.90808296203613	9	665
1671	2835	0	1	8	25	4	5	365200	0	0	1	0	0	0	0	1	0	0	0	0	1	0	0	1	0	700	0	22	NA	1	1	11	6.55108022689819	121	665
1672	2839	0	1	16	31	16	12	981534	1	0	0	0	0	0	0	1	0	0	0	0	1	0	1	0	0	962	0	39	112	1	0	9	6.86901426315308	81	665
1673	2840	0	1	6	24	NA	8	365200	0	1	0	0	0	0	0	1	0	0	0	0	1	0	0	1	0	365	0	13	NA	1	1	12	5.89989757537842	144	665
1674	2841	0	1	9	33	7	3	363128	0	1	0	0	0	0	0	1	0	0	0	0	1	0	0	1	0	475	0	35	NA	6	0	18	6.16331481933594	324	665
1675	2843	0	1	12	24	7	3	365200	0	1	0	0	0	0	0	1	0	0	0	0	1	0	0	1	0	200	0	15	NA	1	0	6	5.29831743240356	36	665
1676	2844	0	1	9	24	NA	NA	75607	0	0	0	0	0	0	0	1	0	0	0	0	1	1	1	0	0	600	0	23	NA	1	1	9	6.39692974090576	81	665
1677	2846	0	1	12	27	8	NA	77507	0	0	0	0	0	0	0	1	0	0	0	0	1	1	1	0	0	505	0	17	76	6	1	9	6.22455835342407	81	665
1678	2852	0	1	16	31	12	12	117386	1	0	0	0	0	0	0	1	0	0	0	0	1	1	1	1	0	577	0	36	82	1	1	9	6.35784244537354	81	665
1679	2853	0	1	12	24	6	12	75607	1	0	0	0	0	0	0	1	0	0	0	0	1	1	0	1	0	457	0	20	NA	6	1	6	6.12468338012695	36	665
1680	2854	0	1	12	34	NA	NA	104904	0	0	0	0	0	0	0	1	0	0	0	0	1	0	1	1	0	750	0	45	97	5	1	16	6.62007331848145	256	665
1681	2855	0	1	11	32	2	11	104904	1	0	0	0	0	0	0	1	0	0	0	0	1	0	0	1	0	577	0	38	98	1	1	15	6.35784244537354	225	665
1682	2857	0	1	15	24	17	16	372835	1	0	0	0	0	0	0	1	0	0	0	0	1	0	1	1	1	289	1	34	124	6	1	3	5.66642665863037	9	665
1683	2859	0	1	12	25	15	9	86498	1	0	0	0	0	0	0	1	0	0	0	0	1	1	1	1	1	224	0	31	NA	1	0	7	5.41164588928223	49	665
1684	2860	0	1	10	24	15	9	86498	0	0	1	0	0	0	0	1	0	0	0	0	1	1	1	1	1	363	0	NA	NA	6	0	8	5.89440298080444	64	665
1685	2861	0	1	10	26	NA	8	88672	0	1	0	0	0	0	0	1	0	0	0	0	1	1	1	1	1	229	0	25	NA	5	0	10	5.43372201919556	100	665
1686	2862	0	1	9	26	2	9	88672	1	0	0	0	0	0	0	1	0	0	0	0	1	1	1	1	1	234	0	20	81	5	0	11	5.45532131195068	121	665
1687	2863	0	1	14	24	NA	7	86507	1	0	0	0	0	0	0	1	0	0	0	0	1	1	1	1	1	465	0	NA	NA	1	0	4	6.1420373916626	16	665
1688	2868	0	1	16	27	NA	NA	426142	0	1	0	0	0	0	0	1	0	0	0	0	1	0	1	1	1	2083	0	34	60	4	1	5	7.64156436920166	25	665
1689	2869	0	1	15	31	12	12	549394	1	0	0	0	0	0	0	1	0	0	0	0	1	1	1	1	1	427	1	44	NA	1	1	10	6.05678415298462	100	665
1690	2871	0	1	12	33	8	9	370720	1	0	0	0	0	0	0	1	0	0	0	0	1	0	1	1	1	678	1	44	100	4	1	15	6.51914739608765	225	665
1691	2872	0	1	13	27	18	16	383527	1	0	0	0	0	0	0	1	0	0	0	0	1	0	0	1	0	313	1	30	84	6	1	8	5.74620342254639	64	665
1692	2873	0	1	18	28	7	12	383527	1	0	0	0	0	0	0	1	0	0	0	0	1	0	1	1	1	601	0	45	132	1	0	4	6.39859485626221	16	665
1693	2874	0	1	10	33	6	12	370720	1	0	0	0	0	0	0	1	0	0	0	0	1	0	1	1	1	500	0	35	96	1	0	17	6.21460819244385	289	665
1694	2875	0	1	12	28	6	12	383527	1	0	0	0	0	0	0	1	0	0	0	0	1	0	1	1	1	375	0	35	100	6	0	10	5.92692613601685	100	665
1695	2877	0	1	12	34	2	6	127041	1	0	0	0	0	0	0	1	0	0	0	0	1	1	1	1	1	550	0	30	109	1	0	16	6.30991840362549	256	665
1696	2880	0	1	17	28	NA	12	78509	0	1	0	0	0	0	0	0	1	0	0	0	1	1	1	0	0	702	1	41	NA	1	1	5	6.55393362045288	25	666
1697	2882	0	1	16	33	NA	14	132931	0	1	0	0	0	0	0	0	1	0	0	0	1	1	1	1	1	625	0	34	84	1	1	11	6.43775177001953	121	666
1698	2883	0	1	14	34	NA	6	112480	0	1	0	0	0	0	0	0	1	0	0	0	1	1	1	1	1	423	0	31	90	1	0	14	6.04737234115601	196	666
1699	2884	0	1	11	28	NA	8	78509	0	1	0	0	0	0	0	0	1	0	0	0	1	1	1	1	1	355	0	28	NA	1	0	11	5.87211799621582	121	666
1700	2885	0	1	12	26	9	12	438085	1	0	0	0	0	0	0	0	1	0	0	0	1	0	1	1	1	519	0	30	98	6	1	8	6.25190401077271	64	666
1701	2886	0	1	14	24	9	12	425871	1	0	0	0	0	0	0	0	1	0	0	0	1	0	1	1	1	359	0	40	120	1	1	4	5.88332223892212	16	666
1702	2888	0	1	11	27	NA	7	78509	0	1	0	0	0	0	0	0	1	0	0	0	1	1	1	1	1	349	0	26	63	1	0	10	5.85507202148438	100	666
1703	2889	0	1	12	31	6	5	118905	1	0	0	0	0	0	0	0	1	0	0	0	1	1	1	1	1	293	0	29	NA	1	0	13	5.68017244338989	169	666
1704	2890	0	1	18	28	NA	5	78509	0	1	0	0	0	0	0	0	1	0	0	0	1	1	1	1	1	443	0	40	100	1	1	4	6.0935697555542	16	666
1705	2891	0	1	6	34	6	6	112480	1	0	0	0	0	0	0	0	1	0	0	0	1	1	1	1	1	270	0	20	NA	1	0	22	5.59842205047607	484	666
1706	2892	0	1	14	28	16	13	107087	1	0	0	0	0	0	0	0	1	0	0	0	1	0	1	1	0	385	0	36	110	1	1	8	5.95324325561523	64	666
1707	2895	0	1	12	27	NA	12	91831	1	0	0	0	0	0	0	0	1	0	0	0	1	0	1	1	1	438	0	43	83	1	0	9	6.08221912384033	81	666
1708	2897	0	1	11	30	NA	NA	572299	0	0	0	0	0	0	0	0	1	0	0	0	1	0	1	1	1	417	0	38	88	1	1	13	6.03308629989624	169	666
1709	2901	0	1	11	31	6	NA	572299	0	0	0	0	0	0	0	0	1	0	0	0	1	0	1	1	1	481	0	41	98	1	0	14	6.17586708068848	196	666
1710	2903	0	1	16	30	16	12	110376	1	0	0	0	0	0	0	0	1	0	0	0	1	0	1	1	0	596	1	49	113	1	1	8	6.39024066925049	64	666
1711	2905	0	1	12	28	3	8	95822	1	0	0	0	0	0	0	0	1	0	0	0	1	1	1	1	1	600	0	22	103	1	0	10	6.39692974090576	100	666
1712	2908	0	1	14	27	NA	9	77507	0	1	0	0	0	0	0	0	1	0	0	0	1	1	1	1	1	250	0	19	NA	6	0	7	5.52146100997925	49	666
1713	2909	0	1	12	31	6	10	117386	0	1	0	0	0	0	0	0	1	0	0	0	1	1	1	1	1	531	0	18	97	1	0	13	6.27476215362549	169	666
1714	2910	0	1	12	26	6	10	77507	1	0	0	0	0	0	0	0	1	0	0	0	1	1	1	1	1	591	0	17	NA	1	0	8	6.38181591033936	64	666
1715	2911	0	1	12	33	NA	NA	111044	1	0	0	0	0	0	0	0	1	0	0	0	1	1	1	0	1	503	0	32	76	1	0	15	6.22059011459351	225	666
1716	2912	0	1	11	25	NA	9	89353	0	1	0	0	0	0	0	0	1	0	0	0	1	1	1	0	1	475	0	27	NA	1	0	8	6.16331481933594	64	666
1717	2913	1	1	16	31	12	12	501027	1	0	0	0	0	0	0	1	0	0	0	0	1	0	1	1	1	1374	0	44	126	4	1	9	7.22548151016235	81	665
1718	2916	1	1	17	24	17	12	372835	1	0	0	0	0	0	0	1	0	0	0	0	1	0	1	0	1	325	1	49	NA	6	1	1	5.78382539749146	1	665
1719	2917	1	1	14	25	6	12	372835	1	0	0	0	0	0	0	1	0	0	0	0	1	0	1	1	1	577	1	NA	108	1	0	5	6.35784244537354	25	665
1720	2918	1	1	12	25	NA	11	372835	0	0	0	0	0	0	0	1	0	0	0	0	1	0	1	0	1	702	0	44	127	1	1	7	6.55393362045288	49	665
1721	2921	1	1	16	25	16	14	372835	1	0	0	0	0	0	0	1	0	0	0	0	1	0	1	1	1	444	0	32	112	6	1	3	6.09582471847534	9	665
1722	2922	1	1	13	27	12	12	88672	1	0	0	0	0	0	0	1	0	0	0	0	1	1	1	1	1	560	0	29	99	5	1	8	6.32793664932251	64	665
1723	2925	1	1	13	32	8	8	370720	1	0	0	0	0	0	0	1	0	0	0	0	1	0	1	1	1	962	0	39	94	1	1	13	6.86901426315308	169	665
1724	2926	1	1	12	26	NA	7	383527	0	1	0	0	0	0	0	1	0	0	0	0	1	0	1	1	1	310	0	28	NA	6	1	8	5.736572265625	64	665
1725	2927	1	1	17	33	16	16	741440	1	0	0	0	0	0	0	1	0	0	0	0	1	0	1	1	1	1269	1	48	127	1	1	10	7.1459846496582	100	665
1726	2928	1	1	16	28	16	16	767055	1	0	0	0	0	0	0	1	0	0	0	0	1	0	1	0	1	500	0	48	97	5	1	6	6.21460819244385	36	665
1727	2929	1	1	16	30	16	16	1002054	1	0	0	0	0	0	0	1	0	0	0	0	1	0	1	0	0	583	1	52	114	6	1	8	6.36818695068359	64	665
1728	2930	1	1	17	25	16	16	745670	1	0	0	0	0	0	0	1	0	0	0	0	1	0	1	0	1	112	1	33	116	6	1	2	4.71849870681763	4	665
1729	2931	1	1	14	33	13	12	730842	1	0	0	0	0	0	0	1	0	0	0	0	1	0	1	0	1	673	0	45	125	1	1	13	6.51174545288086	169	665
1730	2932	1	1	17	29	14	12	987731	1	0	0	0	0	0	0	1	0	0	0	0	1	0	1	1	1	1923	1	43	104	1	1	6	7.56164169311523	36	665
1731	2936	1	1	14	24	12	12	86498	1	0	0	0	0	0	0	1	0	0	0	0	1	1	1	1	1	400	0	27	NA	6	1	4	5.99146461486816	16	665
1732	2937	1	1	12	25	12	12	86498	1	0	0	0	0	0	0	1	0	0	0	0	1	1	1	1	1	460	0	27	99	1	1	7	6.13122653961182	49	665
1733	2939	1	1	12	30	NA	12	134296	0	0	1	0	0	0	0	1	0	0	0	0	1	1	1	1	1	245	0	NA	NA	6	0	12	5.5012583732605	144	665
1734	2943	1	1	16	27	12	12	88672	1	0	0	0	0	0	0	1	0	0	0	0	1	1	1	1	1	315	0	44	127	1	0	5	5.75257253646851	25	665
1735	2945	1	1	14	26	8	10	383527	1	0	0	0	0	0	0	1	0	0	0	0	1	0	1	1	1	641	0	37	103	1	1	6	6.46302938461304	36	665
1736	2946	1	1	12	25	8	10	372835	1	0	0	0	0	0	0	1	0	0	0	0	1	0	1	1	1	750	0	23	98	1	1	7	6.62007331848145	49	665
1737	2948	1	1	17	25	18	18	367506	1	0	0	0	0	0	0	1	0	0	0	0	1	0	1	0	1	308	1	35	NA	1	1	2	5.73009967803955	4	665
1738	2950	1	1	17	29	18	16	493866	1	0	0	0	0	0	0	1	0	0	0	0	1	0	1	0	1	350	1	42	137	1	1	6	5.85793304443359	36	665
1739	2951	1	1	18	27	18	16	378045	1	0	0	0	0	0	0	1	0	0	0	0	1	0	1	0	1	462	0	32	137	5	1	3	6.13556480407715	9	665
1740	2953	1	1	15	34	12	12	370720	1	0	0	0	0	0	0	1	0	0	0	0	1	0	1	0	1	1154	0	51	103	1	0	13	7.05098962783813	169	665
1741	2954	1	1	16	34	12	12	411911	1	0	0	0	0	0	0	1	0	0	0	0	1	0	1	1	1	1748	0	44	111	1	1	12	7.46622753143311	144	665
1742	2956	1	1	17	33	15	12	411911	1	0	0	0	0	0	0	1	0	0	0	0	1	0	1	0	1	769	0	51	115	1	1	10	6.64509105682373	100	665
1743	2957	0	1	15	29	12	11	572299	1	0	0	0	0	0	0	0	0	1	0	0	1	0	1	0	0	730	0	42	109	1	1	8	6.59304475784302	64	667
1744	2961	0	1	18	30	13	17	572299	1	0	0	0	0	0	0	0	0	1	0	0	1	0	0	1	0	736	0	49	107	1	1	6	6.60123014450073	36	667
1745	2962	0	1	16	25	14	13	425871	0	0	1	0	0	0	0	0	0	1	0	0	1	0	0	1	0	500	0	34	128	1	1	3	6.21460819244385	9	667
1746	2963	0	1	16	24	12	12	425871	0	0	1	0	0	0	0	0	0	1	0	0	1	0	0	1	0	365	0	36	123	4	1	2	5.89989757537842	4	667
1747	2965	0	1	13	24	3	3	405778	1	0	0	0	0	0	0	0	0	1	0	0	1	0	1	1	0	333	1	25	91	1	1	5	5.80814266204834	25	667
1748	2966	0	1	12	33	4	8	363128	1	0	0	0	0	0	0	0	0	1	0	0	1	0	0	1	0	721	0	40	NA	1	0	15	6.58063936233521	225	667
1749	2967	0	1	12	27	3	3	375674	1	0	0	0	0	0	0	0	0	1	0	0	1	0	0	1	0	375	0	21	89	1	1	9	5.92692613601685	81	667
1750	2968	0	1	12	26	9	5	345645	1	0	0	0	0	0	0	0	0	1	0	0	1	0	0	1	0	250	0	31	NA	1	0	8	5.52146100997925	64	667
1751	2971	0	1	17	30	4	8	451538	1	0	0	0	0	0	0	0	0	1	0	0	1	0	0	1	0	361	1	34	87	1	1	7	5.88887786865234	49	667
1752	2972	0	0	7	32	NA	4	423456	1	0	0	0	0	0	0	0	1	0	0	0	1	0	0	1	0	283	0	28	NA	1	0	19	5.64544677734375	361	666
1753	2975	0	0	12	34	NA	18	846911	0	1	0	0	0	0	0	0	1	0	0	0	1	0	0	1	0	415	0	37	NA	1	0	16	6.02827835083008	256	666
1754	2978	0	0	16	27	8	11	345645	1	0	0	0	0	0	0	0	1	0	0	0	1	0	0	1	0	522	1	38	101	1	1	5	6.25766754150391	25	666
1755	2979	0	0	12	33	11	11	334102	1	0	0	0	0	0	0	0	1	0	0	0	1	0	0	1	0	706	0	33	90	1	1	15	6.55961513519287	225	666
1756	2981	0	0	16	26	10	11	345645	1	0	0	0	0	0	0	0	1	0	0	0	1	0	0	1	0	409	1	41	104	1	1	4	6.0137152671814	16	666
1757	2982	0	0	12	24	7	12	336009	1	0	0	0	0	0	0	0	1	0	0	0	1	0	0	1	0	416	0	39	105	1	1	6	6.03068542480469	36	666
1758	2984	0	0	12	30	NA	8	451538	1	0	0	0	0	0	0	0	1	0	0	0	1	0	1	0	0	786	0	27	100	6	1	12	6.66695690155029	144	666
1759	2986	0	0	16	27	12	16	107087	1	0	0	0	0	0	0	0	1	0	0	0	1	0	0	1	1	577	0	40	111	1	1	5	6.35784244537354	25	666
1760	2987	0	0	16	24	16	12	104102	1	0	0	0	0	0	0	0	1	0	0	0	1	0	0	1	0	478	0	39	95	1	1	2	6.16961050033569	4	666
1761	2988	0	0	17	27	13	16	107087	1	0	0	0	0	0	0	0	1	0	0	0	1	0	1	1	1	625	0	44	125	6	1	4	6.43775177001953	16	666
1762	2989	0	0	17	24	12	16	104102	1	0	0	0	0	0	0	0	1	0	0	0	1	0	0	1	0	505	0	35	95	4	1	1	6.22455835342407	1	666
1763	2990	0	0	12	32	1	8	363128	1	0	0	0	0	0	0	0	1	0	0	0	1	0	0	1	0	287	0	37	NA	1	1	14	5.6594820022583	196	666
1764	2991	0	0	12	24	6	8	336009	1	0	0	0	0	0	0	0	1	0	0	0	1	0	1	1	0	500	0	24	NA	1	1	6	6.21460819244385	36	666
1765	2992	0	0	8	27	7	8	384050	1	0	0	0	0	0	0	0	1	0	0	0	1	0	1	1	0	500	0	34	NA	4	0	13	6.21460819244385	169	666
1766	2993	0	0	12	27	7	12	345645	1	0	0	0	0	0	0	0	1	0	0	0	1	0	0	1	0	350	0	22	NA	1	1	9	5.85793304443359	81	666
1767	2996	0	0	13	24	12	11	336009	1	0	0	0	0	0	0	0	1	0	0	0	1	0	0	1	0	462	0	34	NA	1	0	5	6.13556480407715	25	666
1768	2998	0	0	13	30	6	1	480216	1	0	0	0	0	0	0	0	1	0	0	0	1	1	0	1	0	548	0	29	NA	6	0	11	6.30627536773682	121	666
1769	2999	0	0	12	28	6	3	317074	1	0	0	0	0	0	0	0	1	0	0	0	1	1	0	1	0	255	0	32	NA	1	0	10	5.54126358032227	100	666
1770	3001	0	0	13	24	4	1	309300	1	0	0	0	0	0	0	0	1	0	0	0	1	1	1	1	0	524	0	26	NA	6	0	5	6.2614917755127	25	666
1771	3002	0	0	12	33	5	9	454271	1	0	0	0	0	0	0	0	1	0	0	0	1	1	0	1	0	292	0	29	NA	1	0	15	5.67675399780273	225	666
1772	3004	0	0	14	28	7	7	375674	1	0	0	0	0	0	0	0	1	0	0	0	1	0	1	1	0	375	0	24	NA	1	0	8	5.92692613601685	64	666
1773	3008	0	0	18	32	7	11	363128	1	0	0	0	0	0	0	0	1	0	0	0	1	0	1	1	1	529	0	38	NA	6	1	8	6.27098846435547	64	666
1774	3012	0	0	16	25	10	12	336009	1	0	0	0	0	0	0	0	1	0	0	0	1	0	0	1	0	909	0	20	124	6	0	3	6.81234502792358	9	666
1775	3013	0	0	9	28	NA	7	375674	0	1	0	0	0	0	0	0	1	0	0	0	1	0	1	1	1	353	0	30	NA	1	0	13	5.86646795272827	169	666
1776	3018	0	0	14	28	12	12	375674	1	0	0	0	0	0	0	0	1	0	0	0	1	0	1	1	1	1155	0	41	107	1	1	8	7.05185556411743	64	666
1777	3021	0	0	8	34	NA	NA	403476	1	0	0	0	0	0	0	0	1	0	0	0	1	0	1	1	1	250	0	22	NA	4	0	20	5.52146100997925	400	666
1778	3022	0	0	13	28	12	12	107087	1	0	0	0	0	0	0	0	1	0	0	0	1	0	1	1	1	781	1	35	107	1	1	9	6.6605749130249	81	666
1779	3023	0	0	13	31	16	12	139895	1	0	0	0	0	0	0	0	1	0	0	0	1	0	1	1	1	416	0	45	110	6	1	12	6.03068542480469	144	666
1780	3029	0	1	13	29	7	11	118905	1	0	0	0	0	0	0	1	0	0	0	0	1	1	0	1	0	364	1	30	80	1	0	10	5.89715385437012	100	665
1781	3030	0	1	13	27	NA	11	78509	0	0	1	0	0	0	0	1	0	0	0	0	1	1	1	1	0	375	1	27	91	1	0	8	5.92692613601685	64	665
1782	3032	0	1	15	24	7	11	76585	0	1	0	0	0	0	0	1	0	0	0	0	1	1	0	1	0	375	1	29	NA	1	0	3	5.92692613601685	9	665
1783	3033	0	1	16	28	NA	5	78509	0	1	0	0	0	0	0	1	0	0	0	0	1	1	0	1	0	358	1	26	96	1	NA	6	5.88053321838379	36	665
1784	3034	0	1	7	31	NA	2	140524	0	1	0	0	0	0	0	1	0	0	0	0	1	1	0	1	0	300	0	16	NA	2	0	18	5.70378255844116	324	665
1785	3036	0	1	14	25	16	16	425871	1	0	0	0	0	0	0	1	0	0	0	0	1	0	0	1	0	528	0	32	102	1	1	5	6.26909637451172	25	665
1786	3037	0	1	12	34	NA	NA	88765	0	1	0	0	0	0	0	1	0	0	0	0	1	0	0	1	0	299	0	26	93	6	0	16	5.70044374465942	256	665
1787	3038	0	1	8	32	0	8	454271	1	0	0	0	0	0	0	1	0	0	0	0	1	1	0	1	0	450	0	33	NA	1	0	18	6.10924768447876	324	665
1788	3039	0	1	14	25	6	10	309300	1	0	0	0	0	0	0	1	0	0	0	0	1	1	0	1	0	540	1	20	NA	1	0	5	6.29156923294067	25	665
1789	3040	0	1	8	29	1	6	490767	1	0	0	0	0	0	0	1	0	0	0	0	1	0	0	1	0	528	0	26	NA	1	0	15	6.26909637451172	225	665
1790	3042	0	1	12	30	NA	12	119965	1	0	0	0	0	0	0	1	0	0	0	0	1	0	0	1	0	769	0	36	81	1	1	12	6.64509105682373	144	665
1791	3043	0	1	12	26	5	8	77507	1	0	0	0	0	0	0	1	0	0	0	0	1	1	1	0	0	198	0	32	NA	6	0	8	5.28826713562012	64	665
1792	3047	0	1	12	24	2	3	75607	1	0	0	0	0	0	0	1	0	0	0	0	1	1	1	0	0	400	0	22	NA	6	0	6	5.99146461486816	36	665
1793	3048	0	1	12	28	NA	6	77507	0	0	0	0	0	0	0	1	0	0	0	0	1	1	1	0	0	753	0	26	NA	6	0	10	6.62406539916992	100	665
1794	3049	0	1	12	24	NA	NA	75607	0	0	0	0	0	0	0	1	0	0	0	0	1	1	1	0	0	445	1	20	NA	6	0	6	6.09807443618774	36	665
1795	3050	0	1	9	30	3	5	117386	1	0	0	0	0	0	0	1	0	0	0	0	1	1	0	1	0	240	0	18	NA	1	0	15	5.48063898086548	225	665
1796	3052	0	1	3	25	NA	5	75607	0	1	0	0	0	0	0	1	0	0	0	0	1	1	0	1	0	167	0	6	NA	1	0	16	5.11799383163452	256	665
1797	3059	0	1	12	24	9	7	89271	1	0	0	0	0	0	0	1	0	0	0	0	1	0	1	1	0	445	0	36	NA	1	0	6	6.09807443618774	36	665
1798	3060	0	1	10	26	3	4	77507	1	0	0	0	0	0	0	1	0	0	0	0	1	1	0	1	0	250	0	8	NA	1	0	10	5.52146100997925	100	665
1799	3061	0	1	12	26	10	12	91831	1	0	0	0	0	0	0	1	0	0	0	0	1	0	0	1	0	475	0	36	99	1	0	8	6.16331481933594	64	665
1800	3062	0	1	16	28	16	16	84491	1	0	0	0	0	0	0	1	0	0	0	0	1	0	0	1	1	400	0	42	122	1	1	6	5.99146461486816	36	665
1801	3063	0	1	18	24	16	16	82135	1	0	0	0	0	0	0	1	0	0	0	0	1	0	0	1	0	398	0	38	94	6	1	0	5.98645210266113	0	665
1802	3064	0	1	12	25	3	5	75607	1	0	0	0	0	0	0	1	0	0	0	0	1	1	1	0	0	350	0	24	NA	1	1	7	5.85793304443359	49	665
1803	3065	0	1	12	33	NA	NA	111044	1	0	0	0	0	0	0	1	0	0	0	0	1	1	0	1	0	523	0	26	93	1	0	15	6.25958156585693	225	665
1804	3066	0	1	10	31	4	8	117386	1	0	0	0	0	0	0	1	0	0	0	0	1	1	0	1	0	270	0	31	NA	1	0	15	5.59842205047607	225	665
1805	3067	0	1	9	30	NA	1	117386	1	0	0	0	0	0	0	1	0	0	0	0	1	1	0	1	0	310	0	20	NA	1	0	15	5.736572265625	225	665
1806	3071	0	1	6	31	NA	NA	117386	0	0	0	0	0	0	0	1	0	0	0	0	1	1	0	1	0	300	0	NA	NA	2	0	19	5.70378255844116	361	665
1807	3072	0	1	12	28	NA	NA	77507	0	0	0	0	0	0	0	1	0	0	0	0	1	1	0	1	0	325	0	32	69	1	0	10	5.78382539749146	100	665
1808	3074	0	1	12	24	18	12	367506	1	0	0	0	0	0	0	1	0	0	0	0	1	0	1	1	1	900	0	28	NA	1	0	6	6.80239486694336	36	665
1809	3077	0	0	13	26	12	12	438085	1	0	0	0	0	0	0	1	0	0	0	0	1	0	1	1	1	750	0	35	102	1	0	7	6.62007331848145	49	665
1810	3079	0	0	8	26	NA	6	77507	0	1	0	0	0	0	0	1	0	0	0	0	1	1	1	1	1	285	0	12	NA	1	0	12	5.65248918533325	144	665
1811	3081	0	0	12	24	12	12	82135	1	0	0	0	0	0	0	1	0	0	0	0	1	0	1	1	1	278	0	10	NA	1	0	6	5.62762117385864	36	665
1812	3082	0	0	13	29	13	10	117386	1	0	0	0	0	0	0	1	0	0	0	0	1	1	1	1	1	500	0	29	NA	1	1	10	6.21460819244385	100	665
1813	3084	0	0	8	30	5	8	119965	1	0	0	0	0	0	0	1	0	0	0	0	1	0	1	1	1	700	0	28	NA	1	0	16	6.55108022689819	256	665
1814	3085	0	0	9	26	5	8	91831	1	0	0	0	0	0	0	1	0	0	0	0	1	0	1	1	1	300	0	16	NA	1	0	11	5.70378255844116	121	665
1815	3086	0	0	8	34	5	8	88765	1	0	0	0	0	0	0	1	0	0	0	0	1	0	1	1	1	392	0	36	NA	1	0	20	5.97126197814941	400	665
1816	3088	0	0	12	34	5	12	88765	1	0	0	0	0	0	0	1	0	0	0	0	1	0	1	1	1	511	0	44	95	1	0	16	6.23636960983276	256	665
1817	3089	0	0	16	31	8	11	119965	1	0	0	0	0	0	0	1	0	0	0	0	1	0	1	1	1	624	0	37	98	6	1	9	6.43615055084229	81	665
1818	3090	0	0	12	27	NA	NA	77507	0	0	0	0	0	0	0	1	0	0	0	0	1	1	1	1	1	244	0	28	84	1	0	9	5.49716806411743	81	665
1819	3091	0	0	12	27	7	NA	91831	1	0	0	0	0	0	0	1	0	0	0	0	1	0	1	1	1	363	0	30	88	1	1	9	5.89440298080444	81	665
1820	3097	0	0	16	27	NA	4	84491	0	1	0	0	0	0	0	0	0	1	0	0	1	0	1	1	0	606	0	41	109	5	1	5	6.40687990188599	25	667
1821	3098	0	0	12	25	NA	9	851743	0	1	0	0	0	0	0	0	0	1	0	0	1	0	1	1	1	760	0	32	115	1	1	7	6.63331842422485	49	667
1822	3104	0	0	14	31	12	12	130444	1	0	0	0	0	0	0	0	0	1	0	0	1	0	1	1	1	385	0	37	105	1	1	11	5.95324325561523	121	667
1823	3109	0	0	12	32	8	8	454271	1	0	0	0	0	0	0	0	0	1	0	0	1	1	1	1	1	495	0	27	NA	1	0	14	6.2045578956604	196	667
1824	3110	0	0	16	27	8	10	438085	1	0	0	0	0	0	0	0	0	1	0	0	1	0	1	1	0	828	1	38	90	1	1	5	6.71901321411133	25	667
1825	3111	0	0	12	25	NA	12	425871	0	1	0	0	0	0	0	0	0	1	0	0	1	0	1	1	1	404	0	28	92	1	1	7	6.00141477584839	49	667
1826	3112	0	0	15	27	10	12	438085	1	0	0	0	0	0	0	0	0	1	0	0	1	0	0	1	1	267	0	27	113	6	1	6	5.58724880218506	36	667
1827	3114	0	0	12	34	5	8	423456	1	0	0	0	0	0	0	0	0	1	0	0	1	0	0	1	0	440	0	41	82	1	0	16	6.0867748260498	256	667
1828	3116	0	0	14	28	NA	12	438085	0	1	0	0	0	0	0	0	0	1	0	0	1	0	0	1	0	375	0	22	105	6	1	8	5.92692613601685	64	667
1829	3117	0	0	10	24	2	8	336009	1	0	0	0	0	0	0	0	0	1	0	0	1	0	0	1	0	301	0	22	NA	1	1	8	5.70711040496826	64	667
1830	3118	0	0	12	34	8	12	363128	1	0	0	0	0	0	0	0	0	1	0	0	1	0	0	1	0	658	0	36	95	1	1	16	6.48920488357544	256	667
1831	3119	0	0	15	24	7	10	76585	1	0	0	0	0	0	0	0	0	1	0	0	1	1	1	0	0	514	0	33	92	4	1	3	6.24222326278687	9	667
1832	3120	0	0	12	26	NA	7	78509	0	1	0	0	0	0	0	0	0	1	0	0	1	1	0	1	0	300	0	25	NA	6	0	8	5.70378255844116	64	667
1833	3122	0	0	12	26	10	7	78509	0	0	1	0	0	0	0	0	0	1	0	0	1	1	0	1	0	230	0	24	NA	6	0	8	5.43807935714722	64	667
1834	3126	0	0	10	31	NA	NA	118905	0	0	0	0	0	0	0	0	0	1	0	0	1	1	0	1	0	260	0	12	NA	6	0	15	5.56068181991577	225	667
1835	3127	0	0	12	24	8	9	76585	0	0	1	0	0	0	0	0	0	1	0	0	1	1	0	1	0	305	0	16	NA	1	1	6	5.72031164169312	36	667
1836	3128	0	0	8	31	0	0	122798	1	0	0	0	0	0	0	0	0	1	0	0	1	1	0	1	0	430	0	21	NA	1	0	17	6.06378507614136	289	667
1837	3129	0	0	8	24	0	0	79093	1	0	0	0	0	0	0	0	0	1	0	0	1	1	0	1	0	260	0	12	NA	1	1	10	5.56068181991577	100	667
1838	3130	0	0	16	24	12	12	89271	1	0	0	0	0	0	0	0	0	1	0	0	1	0	1	1	0	577	0	36	140	6	1	2	6.35784244537354	4	667
1839	3132	0	0	11	29	4	2	117386	1	0	0	0	0	0	0	0	0	1	0	0	1	1	0	1	0	425	0	19	NA	1	1	12	6.05208921432495	144	667
1840	3133	0	0	12	25	4	2	79093	1	0	0	0	0	0	0	0	0	1	0	0	1	1	0	1	0	315	0	24	NA	1	0	7	5.75257253646851	49	667
1841	3134	0	0	13	29	7	10	119965	1	0	0	0	0	0	0	0	0	1	0	0	1	0	0	1	0	375	1	33	85	1	0	10	5.92692613601685	100	667
1842	3135	0	0	9	33	1	2	111044	1	0	0	0	0	0	0	0	0	1	0	0	1	1	0	1	0	500	0	23	NA	1	0	18	6.21460819244385	324	667
1843	3136	0	0	12	25	1	6	365200	1	0	0	0	0	0	0	0	0	1	0	0	1	0	1	1	0	500	0	30	116	4	0	7	6.21460819244385	49	667
1844	3137	0	0	12	32	3	1	111044	1	0	0	0	0	0	0	0	0	1	0	0	1	1	1	1	0	350	0	24	85	1	0	14	5.85793304443359	196	667
1845	3138	0	0	10	29	3	1	117386	1	0	0	0	0	0	0	0	0	1	0	0	1	1	1	1	0	525	0	20	85	1	1	13	6.26339817047119	169	667
1846	3139	0	0	17	26	13	12	84491	1	0	0	0	0	0	0	0	0	1	0	0	1	0	0	1	0	500	0	37	NA	1	1	3	6.21460819244385	9	667
1847	3140	0	0	16	25	13	12	82135	1	0	0	0	0	0	0	0	0	1	0	0	1	0	1	1	0	385	0	21	122	1	1	3	5.95324325561523	9	667
1848	3142	0	1	9	25	12	8	86498	1	0	0	0	0	0	0	0	0	1	0	0	1	1	1	1	1	100	0	25	NA	1	1	10	4.60517024993896	100	667
1849	3143	0	1	15	26	6	7	88672	0	0	1	0	0	0	0	0	0	1	0	0	1	1	1	1	1	300	0	26	74	1	1	5	5.70378255844116	25	667
1850	3144	0	1	12	24	6	7	86498	0	0	1	0	0	0	0	0	0	1	0	0	1	1	1	1	1	188	0	24	NA	6	1	6	5.23644208908081	36	667
1851	3145	0	1	8	33	NA	3	127041	0	1	0	0	0	0	0	0	0	1	0	0	1	1	1	1	1	355	0	19	NA	1	1	19	5.87211799621582	361	667
1852	3147	0	1	12	25	4	4	86507	1	0	0	0	0	0	0	0	0	1	0	0	1	1	1	1	1	267	0	19	110	1	0	7	5.58724880218506	49	667
1853	3149	0	1	12	28	6	7	88681	1	0	0	0	0	0	0	0	0	1	0	0	1	1	1	1	1	267	0	30	NA	1	0	10	5.58724880218506	100	667
1854	3150	0	1	12	34	8	8	370720	1	0	0	0	0	0	0	0	0	1	0	0	1	0	1	1	1	586	0	38	NA	1	1	16	6.37331962585449	256	667
1855	3151	0	1	12	24	NA	5	76585	0	0	0	0	0	0	0	1	0	0	0	0	1	1	0	1	0	375	0	27	NA	4	1	6	5.92692613601685	36	665
1856	3154	0	1	12	31	NA	NA	118905	0	0	0	0	0	0	0	1	0	0	0	0	1	1	0	1	0	346	0	27	NA	5	0	13	5.84643888473511	169	665
1857	3157	0	1	16	28	14	12	438085	1	0	0	0	0	0	0	1	0	0	0	0	1	0	1	1	0	545	0	43	123	1	1	6	6.30078601837158	36	665
1858	3158	0	1	14	25	14	12	425871	1	0	0	0	0	0	0	1	0	0	0	0	1	0	1	1	0	562	0	31	122	1	1	5	6.33150196075439	25	665
1859	3159	0	1	12	26	12	12	438085	1	0	0	0	0	0	0	1	0	0	0	0	1	0	1	0	0	577	0	24	86	1	1	8	6.35784244537354	64	665
1860	3163	0	1	15	26	10	12	438085	1	0	0	0	0	0	0	1	0	0	0	0	1	0	1	0	0	890	0	30	80	1	1	5	6.79122161865234	25	665
1861	3166	0	1	13	26	6	NA	91831	1	0	0	0	0	0	0	1	0	0	0	0	1	0	0	1	0	625	0	30	96	1	0	7	6.43775177001953	49	665
1862	3168	0	1	13	26	6	12	91831	1	0	0	0	0	0	0	1	0	0	0	0	1	0	0	1	0	416	0	31	112	6	1	7	6.03068542480469	49	665
1863	3169	0	1	6	31	4	NA	119965	1	0	0	0	0	0	0	1	0	0	0	0	1	0	0	1	0	683	0	28	NA	1	0	19	6.5264949798584	361	665
1864	3171	1	0	11	30	NA	9	118905	1	0	0	0	0	0	0	1	0	0	0	0	1	1	1	1	1	625	0	20	NA	1	1	13	6.43775177001953	169	665
1865	3172	1	0	9	27	NA	NA	78509	0	1	0	0	0	0	0	1	0	0	0	0	1	1	1	1	1	310	0	34	NA	6	0	12	5.736572265625	144	665
1866	3173	1	0	12	28	NA	NA	78509	0	1	0	0	0	0	0	1	0	0	0	0	1	1	1	1	1	664	0	16	77	1	1	10	6.49828195571899	100	665
1867	3177	1	0	11	32	NA	NA	363128	1	0	0	0	0	0	0	1	0	0	0	0	1	0	1	1	1	286	0	22	92	1	0	15	5.65599203109741	225	665
1868	3179	1	0	12	26	NA	NA	78509	0	0	0	0	0	0	0	1	0	0	0	0	1	1	1	1	1	600	0	36	NA	1	0	8	6.39692974090576	64	665
1869	3182	1	0	16	29	12	12	118905	1	0	0	0	0	0	0	1	0	0	0	0	1	1	1	0	1	742	0	37	89	5	0	7	6.60934925079346	49	665
1870	3185	1	0	11	27	2	5	78509	1	0	0	0	0	0	0	1	0	0	0	0	1	1	1	1	1	225	0	28	NA	6	0	10	5.41610050201416	100	665
1871	3186	1	0	12	34	NA	8	103511	1	0	0	0	0	0	0	1	0	0	0	0	1	0	1	1	1	623	0	41	87	1	0	16	6.43454647064209	256	665
1872	3187	1	0	12	24	NA	8	104102	0	1	0	0	0	0	0	1	0	0	0	0	1	0	1	1	1	603	0	29	NA	6	1	6	6.40191698074341	36	665
1873	3188	1	0	12	29	11	10	165331	1	0	0	0	0	0	0	1	0	0	0	0	1	0	1	1	1	550	0	39	95	1	0	11	6.30991840362549	121	665
1874	3192	1	0	16	27	10	12	375674	1	0	0	0	0	0	0	1	0	0	0	0	1	0	0	1	0	801	0	39	117	1	0	5	6.68586111068726	25	665
1875	3195	0	1	14	30	12	12	572299	1	0	0	0	0	0	0	0	0	1	0	0	1	0	1	1	1	330	0	40	67	1	1	10	5.7990927696228	100	667
1876	3196	0	1	16	34	4	12	470506	1	0	0	0	0	0	0	0	0	1	0	0	1	0	1	1	1	684	0	50	112	1	1	12	6.52795791625977	144	667
1877	3197	0	1	15	29	18	12	635888	1	0	0	0	0	0	0	0	0	1	0	0	1	0	1	0	1	1000	0	41	119	6	1	8	6.90775537490845	64	667
1878	3198	0	1	16	30	NA	NA	139895	1	0	0	0	0	0	0	0	0	1	0	0	1	0	1	1	1	1091	0	30	103	6	0	8	6.99485015869141	64	667
1879	3199	0	1	13	24	NA	10	90509	0	1	0	0	0	0	0	0	0	1	0	0	1	1	1	1	1	476	0	23	NA	4	0	5	6.16541767120361	25	667
1880	3200	0	1	12	24	NA	3	76585	1	0	0	0	0	0	0	0	0	1	0	0	1	1	1	1	1	500	0	30	NA	6	1	6	6.21460819244385	36	667
1881	3201	0	1	14	25	6	10	76585	1	0	0	0	0	0	0	0	0	1	0	0	1	1	1	1	1	950	0	31	NA	1	1	5	6.85646200180054	25	667
1882	3202	0	1	18	30	14	12	140524	1	0	0	0	0	0	0	0	0	1	0	0	1	1	1	1	1	1142	0	36	NA	1	1	6	7.04053640365601	36	667
1883	3203	0	1	12	32	NA	9	460147	0	1	0	0	0	0	0	0	0	1	0	0	1	1	1	1	1	450	0	29	74	1	1	14	6.10924768447876	196	667
1884	3204	0	1	12	25	7	12	851743	0	0	1	0	0	0	0	0	0	1	0	0	1	0	1	1	1	448	1	32	NA	1	1	7	6.10479307174683	49	667
1885	3206	0	1	16	27	12	12	107087	1	0	0	0	0	0	0	0	0	1	0	0	1	0	1	1	1	361	0	35	112	6	1	5	5.88887786865234	25	667
1886	3207	0	1	13	24	12	12	104102	1	0	0	0	0	0	0	0	0	1	0	0	1	0	1	1	1	535	0	19	NA	1	1	5	6.28226661682129	25	667
1887	3210	0	1	17	25	6	8	336009	1	0	0	0	0	0	0	0	0	1	0	0	1	0	1	1	1	616	0	21	102	1	1	2	6.42324686050415	4	667
1888	3211	0	1	14	24	17	14	405778	1	0	0	0	0	0	0	0	0	1	0	0	1	0	1	1	1	490	0	34	NA	6	1	4	6.1944055557251	16	667
1889	3212	0	1	12	26	8	9	375674	1	0	0	0	0	0	0	0	0	1	0	0	1	0	1	1	1	415	0	24	95	1	1	8	6.02827835083008	64	667
1890	3216	1	0	13	24	NA	9	76585	0	1	0	0	0	0	0	1	0	0	0	0	1	1	1	1	1	250	0	21	NA	6	0	5	5.52146100997925	25	665
1891	3220	1	0	13	28	9	6	438085	1	0	0	0	0	0	0	1	0	0	0	0	1	0	0	1	0	500	0	33	81	1	1	9	6.21460819244385	81	665
1892	3221	1	0	18	28	10	10	438085	1	0	0	0	0	0	0	1	0	0	0	0	1	0	1	1	0	1155	0	48	124	1	0	4	7.05185556411743	16	665
1893	3222	1	0	12	32	8	7	470506	1	0	0	0	0	0	0	1	0	0	0	0	1	0	0	1	0	525	0	38	89	1	0	14	6.26339817047119	196	665
1894	3224	1	0	11	24	NA	12	425871	0	1	0	0	0	0	0	1	0	0	0	0	1	0	1	1	0	300	0	23	NA	1	1	7	5.70378255844116	49	665
1895	3225	1	0	9	26	8	12	438085	1	0	0	0	0	0	0	1	0	0	0	0	1	0	0	1	0	308	0	14	NA	1	0	11	5.73009967803955	121	665
1896	3226	1	0	8	29	8	12	572299	1	0	0	0	0	0	0	1	0	0	0	0	1	0	0	1	0	625	0	30	91	1	0	15	6.43775177001953	225	665
1897	3227	1	0	13	24	8	7	425871	1	0	0	0	0	0	0	1	0	0	0	0	1	0	1	1	0	350	1	35	117	6	1	5	5.85793304443359	25	665
1898	3228	1	0	16	30	7	11	572299	1	0	0	0	0	0	0	1	0	0	0	0	1	0	0	1	0	673	0	46	109	1	1	8	6.51174545288086	64	665
1899	3229	1	0	13	28	NA	7	486761	1	0	0	0	0	0	0	1	0	0	0	0	1	0	0	1	0	558	1	26	NA	1	0	9	6.32435894012451	81	665
1900	3232	1	0	12	28	6	7	317074	1	0	0	0	0	0	0	1	0	0	0	0	1	1	0	1	0	351	0	34	88	1	1	10	5.86078643798828	100	665
1901	3233	1	0	12	28	5	9	317074	1	0	0	0	0	0	0	1	0	0	0	0	1	1	1	0	0	723	0	31	67	1	0	10	6.58340930938721	100	665
1902	3234	1	0	15	27	9	12	317074	0	0	0	0	0	0	0	1	0	0	0	0	1	1	0	1	0	569	1	32	81	1	1	6	6.34388065338135	36	665
1903	3235	1	0	11	25	6	12	626601	1	0	0	0	0	0	0	1	0	0	0	0	1	1	1	1	1	240	0	35	81	6	1	8	5.48063898086548	64	665
1904	3236	1	0	8	32	7	4	88765	1	0	0	0	0	0	0	1	0	0	0	0	1	0	0	1	0	450	0	34	NA	1	0	18	6.10924768447876	324	665
1905	3237	1	0	11	33	3	3	131234	1	0	0	0	0	0	0	1	0	0	0	0	1	1	0	1	0	338	0	39	NA	1	1	16	5.82304573059082	256	665
1906	3238	1	0	10	29	0	7	138729	1	0	0	0	0	0	0	1	0	0	0	0	1	1	0	1	0	288	0	23	NA	1	0	13	5.66296052932739	169	665
1907	3242	0	1	17	24	12	12	425871	1	0	0	0	0	0	0	1	0	0	0	0	1	0	0	1	0	413	0	31	119	1	1	1	6.02344751358032	1	665
1908	3244	0	1	12	29	8	12	635888	1	0	0	0	0	0	0	1	0	0	0	0	1	0	0	1	0	848	0	28	83	1	1	11	6.74288082122803	121	665
1909	3245	0	1	16	32	7	16	423456	1	0	0	0	0	0	0	1	0	0	0	0	1	0	0	1	0	874	0	38	101	1	1	10	6.77308034896851	100	665
1910	3247	0	1	11	29	12	NA	118905	1	0	0	0	0	0	0	1	0	0	0	0	1	1	0	1	0	295	0	27	NA	1	1	12	5.68697547912598	144	665
1911	3248	0	1	8	26	NA	NA	78509	1	0	0	0	0	0	0	1	0	0	0	0	1	1	0	1	0	300	0	12	NA	4	0	12	5.70378255844116	144	665
1912	3252	0	1	16	26	9	12	78509	1	0	0	0	0	0	0	1	0	0	0	0	1	1	1	1	0	289	0	41	NA	1	1	4	5.66642665863037	16	665
1913	3256	0	1	9	29	6	14	140524	1	0	0	0	0	0	0	1	0	0	0	0	1	1	0	1	0	298	0	19	NA	2	0	14	5.69709348678589	196	665
1914	3257	0	1	5	32	2	5	132931	1	0	0	0	0	0	0	1	0	0	0	0	1	1	0	1	0	361	0	14	NA	1	0	21	5.88887786865234	441	665
1915	3261	0	1	12	30	NA	NA	118905	0	0	0	0	0	0	0	1	0	0	0	0	1	1	1	0	0	1097	0	23	NA	1	0	12	7.0003342628479	144	665
1916	3262	0	1	16	33	NA	8	112480	0	1	0	0	0	0	0	1	0	0	0	0	1	1	1	0	1	465	0	23	NA	1	1	11	6.1420373916626	121	665
1917	3263	0	1	14	27	NA	8	78509	1	0	0	0	0	0	0	1	0	0	0	0	1	1	0	1	0	265	0	27	75	1	1	7	5.57973003387451	49	665
1918	3265	0	1	16	30	12	12	490767	0	1	0	0	0	0	0	1	0	0	0	0	1	0	1	1	0	839	0	43	109	1	1	8	6.73221063613892	64	665
1919	3266	0	1	16	31	8	14	545297	1	0	0	0	0	0	0	1	0	0	0	0	1	0	0	1	0	577	1	45	111	1	1	9	6.35784244537354	81	665
1920	3267	0	1	10	27	5	5	77507	1	0	0	0	0	0	0	1	0	0	0	0	1	1	0	1	0	225	0	13	NA	1	0	11	5.41610050201416	121	665
1921	3268	0	1	12	25	5	5	75607	1	0	0	0	0	0	0	1	0	0	0	0	1	1	0	1	0	235	0	18	NA	1	0	7	5.45958566665649	49	665
1922	3269	0	1	12	26	2	8	77507	1	0	0	0	0	0	0	1	0	0	0	0	1	1	1	1	0	250	0	17	NA	1	0	8	5.52146100997925	64	665
1923	3272	0	1	12	28	4	1	84491	1	0	0	0	0	0	0	1	0	0	0	0	1	0	0	1	0	196	0	44	104	1	0	10	5.27811479568481	100	665
1924	3274	0	1	12	32	0	4	137285	1	0	0	0	0	0	0	1	0	0	0	0	1	1	0	1	0	475	0	25	72	1	0	14	6.16331481933594	196	665
1925	3277	0	1	11	26	7	4	375674	1	0	0	0	0	0	0	1	0	0	0	0	1	0	0	1	0	500	0	32	87	4	1	9	6.21460819244385	81	665
1926	3278	0	1	8	29	NA	1	480216	1	0	0	0	0	0	0	1	0	0	0	0	1	1	0	1	0	334	0	20	NA	1	0	15	5.81114101409912	225	665
1927	3279	0	1	10	27	NA	1	317074	1	0	0	0	0	0	0	1	0	0	0	0	1	1	0	1	0	454	0	26	NA	4	0	11	6.11809730529785	121	665
1928	3280	0	1	16	25	16	12	425871	1	0	0	0	0	0	0	1	0	0	0	0	1	0	1	1	0	945	0	41	106	1	1	3	6.8511848449707	9	665
1929	3281	0	1	13	24	8	16	425871	1	0	0	0	0	0	0	1	0	0	0	0	1	0	0	1	0	291	0	25	NA	1	1	5	5.67332315444946	25	665
1930	3282	0	1	16	27	8	10	375674	1	0	0	0	0	0	0	0	1	0	0	0	1	0	0	1	0	520	1	49	118	6	1	5	6.25382900238037	25	666
1931	3283	0	1	15	28	5	11	417415	1	0	0	0	0	0	0	0	1	0	0	0	1	0	0	1	0	474	0	30	103	1	0	7	6.16120719909668	49	666
1932	3284	0	1	8	32	8	6	363128	1	0	0	0	0	0	0	0	1	0	0	0	1	0	0	1	0	296	0	36	NA	1	0	18	5.69035959243774	324	666
1933	3286	0	1	12	33	3	NA	363128	1	0	0	0	0	0	0	0	1	0	0	0	1	0	1	1	1	420	0	28	NA	1	1	15	6.04025459289551	225	666
1934	3287	0	1	12	26	NA	NA	345645	0	0	0	0	0	0	0	0	1	0	0	0	1	0	0	1	0	519	0	28	95	1	1	8	6.25190401077271	64	666
1935	3289	0	1	12	32	8	8	363128	1	0	0	0	0	0	0	0	1	0	0	0	1	0	0	1	0	316	0	32	NA	1	0	14	5.75574207305908	196	666
1936	3290	0	1	12	28	8	6	751347	1	0	0	0	0	0	0	0	1	0	0	0	1	0	0	1	0	375	0	40	91	4	1	10	5.92692613601685	100	666
1937	3291	0	1	13	25	8	8	618601	1	0	0	0	0	0	0	0	1	0	0	0	1	1	0	1	0	550	0	28	NA	1	0	6	6.30991840362549	36	666
1938	3292	0	1	8	33	NA	NA	334102	0	0	0	0	0	0	0	0	1	0	0	0	1	0	0	1	0	944	0	36	NA	1	0	19	6.85012626647949	361	666
1939	3293	0	1	16	27	12	12	383527	1	0	0	0	0	0	0	0	0	1	0	0	1	0	1	1	1	475	0	34	101	1	1	5	6.16331481933594	25	667
1940	3294	0	1	16	27	11	12	383527	1	0	0	0	0	0	0	0	0	1	0	0	1	0	1	1	1	393	0	37	121	1	1	5	5.97380971908569	25	667
1941	3298	0	1	11	24	12	10	414261	1	0	0	0	0	0	0	0	0	1	0	0	1	0	1	1	1	750	0	37	NA	6	1	7	6.62007331848145	49	667
1942	3302	0	1	13	28	3	3	378045	1	0	0	0	0	0	0	0	0	1	0	0	1	0	1	1	1	492	1	26	NA	1	0	9	6.19847869873047	81	667
1943	3305	0	1	12	28	8	8	88672	1	0	0	0	0	0	0	0	0	1	0	0	1	1	1	1	1	500	0	35	65	1	1	10	6.21460819244385	100	667
1944	3310	0	1	11	24	1	3	86498	1	0	0	0	0	0	0	0	0	1	0	0	1	1	1	1	1	268	0	14	NA	1	0	7	5.59098720550537	49	667
1945	3311	0	1	12	33	NA	12	127041	0	1	0	0	0	0	0	0	0	1	0	0	1	1	1	1	1	475	0	30	85	1	0	15	6.16331481933594	225	667
1946	3313	1	1	12	31	NA	8	134296	0	1	0	0	0	0	0	1	0	0	0	0	1	1	1	1	1	365	0	34	70	1	1	13	5.89989757537842	169	665
1947	3314	1	1	11	26	NA	NA	88672	0	1	0	0	0	0	0	1	0	0	0	0	1	1	1	1	1	281	0	10	65	1	0	9	5.63835477828979	81	665
1948	3315	1	1	14	24	NA	NA	86498	0	0	0	0	0	0	0	1	0	0	0	0	1	1	1	1	1	250	0	22	NA	6	0	4	5.52146100997925	16	665
1949	3316	1	1	12	33	NA	6	127041	0	1	0	0	0	0	0	1	0	0	0	0	1	1	1	1	1	263	0	33	90	1	0	15	5.57215404510498	225	665
1950	3318	1	1	18	29	11	12	501027	1	0	0	0	0	0	0	1	0	0	0	0	1	0	1	0	1	1012	0	47	110	1	1	5	6.91968393325806	25	665
1951	3319	1	1	17	28	11	12	383527	1	0	0	0	0	0	0	1	0	0	0	0	1	0	1	1	1	833	0	54	102	1	1	5	6.7250337600708	25	665
1952	3320	1	1	16	24	11	12	372835	1	0	0	0	0	0	0	1	0	0	0	0	1	0	1	0	1	313	0	35	NA	6	1	2	5.74620342254639	4	665
1953	3322	1	1	14	32	12	12	370720	1	0	0	0	0	0	0	1	0	0	0	0	1	0	1	1	1	962	0	31	NA	1	1	12	6.86901426315308	144	665
1954	3323	1	1	9	29	7	5	158714	1	0	0	0	0	0	0	1	0	0	0	0	1	1	1	1	1	346	0	20	67	1	0	14	5.84643888473511	196	665
1955	3326	1	1	11	25	5	NA	86498	0	0	0	0	0	0	0	1	0	0	0	0	1	1	1	1	1	300	0	20	68	6	0	8	5.70378255844116	64	665
1956	3327	1	1	11	32	NA	11	127041	0	1	0	0	0	0	0	1	0	0	0	0	1	1	1	1	1	375	0	37	88	4	1	15	5.92692613601685	225	665
1957	3328	1	1	14	24	10	8	372835	1	0	0	0	0	0	0	1	0	0	0	0	1	0	1	1	1	500	0	34	NA	1	0	4	6.21460819244385	16	665
1958	3329	1	1	12	25	6	9	372835	1	0	0	0	0	0	0	1	0	0	0	0	1	0	1	1	1	346	1	22	NA	1	1	7	5.84643888473511	49	665
1959	3330	0	1	9	34	12	6	127041	1	0	0	0	0	0	0	1	0	0	0	0	1	1	1	1	1	319	0	16	NA	1	1	19	5.76519107818604	361	665
1960	3333	0	1	11	26	12	6	88672	1	0	0	0	0	0	0	1	0	0	0	0	1	1	1	1	1	400	0	22	NA	1	0	9	5.99146461486816	81	665
1961	3338	0	1	13	27	9	8	88672	0	1	0	0	0	0	0	1	0	0	0	0	1	1	1	1	1	548	0	37	NA	1	0	8	6.30627536773682	64	665
1962	3340	0	1	7	25	NA	12	86498	0	1	0	0	0	0	0	1	0	0	0	0	1	1	1	1	1	230	0	19	NA	6	NA	12	5.43807935714722	144	665
1963	3341	0	1	12	26	7	7	383527	1	0	0	0	0	0	0	1	0	0	0	0	1	0	0	1	1	418	0	34	94	1	0	8	6.03548145294189	64	665
1964	3342	0	1	13	29	11	10	501027	1	0	0	0	0	0	0	1	0	0	0	0	1	0	1	1	1	527	1	43	NA	1	0	10	6.2672004699707	100	665
1965	3345	0	1	10	33	8	12	812047	1	0	0	0	0	0	0	1	0	0	0	0	1	0	1	1	1	865	0	38	97	1	0	17	6.76272964477539	289	665
1966	3346	0	1	13	34	NA	6	812047	0	1	0	0	0	0	0	1	0	0	0	0	1	0	1	1	1	519	0	41	98	1	0	15	6.25190401077271	225	665
1967	3348	0	1	11	29	8	8	493866	1	0	0	0	0	0	0	1	0	0	0	0	1	0	1	1	1	335	0	30	NA	6	0	12	5.8141303062439	144	665
1968	3349	0	1	13	33	NA	12	406024	1	0	0	0	0	0	0	1	0	0	0	0	1	0	1	1	1	865	0	48	101	1	0	14	6.76272964477539	196	665
1969	3351	0	1	8	27	7	NA	378045	0	0	0	0	0	0	0	1	0	0	0	0	1	0	0	1	1	520	0	33	NA	1	0	13	6.25382900238037	169	665
1970	3352	0	1	17	27	16	12	383527	1	0	0	0	0	0	0	0	1	0	0	0	1	0	1	1	1	855	0	38	115	1	1	4	6.75110149383545	16	666
1971	3353	0	1	12	24	6	9	372835	1	0	0	0	0	0	0	0	1	0	0	0	1	0	0	1	1	316	0	32	NA	1	0	6	5.75574207305908	36	666
1972	3355	0	1	18	33	18	17	370720	1	0	0	0	0	0	0	0	1	0	0	0	1	0	1	1	1	831	0	44	122	1	1	9	6.7226300239563	81	666
1973	3356	0	1	16	31	18	17	501027	1	0	0	0	0	0	0	0	1	0	0	0	1	0	1	1	1	875	0	38	117	1	1	9	6.77422380447388	81	666
1974	3357	0	1	14	33	4	8	370720	1	0	0	0	0	0	0	0	1	0	0	0	1	0	1	1	1	1374	0	45	105	1	1	13	7.22548151016235	169	666
1975	3358	1	1	16	34	NA	8	365421	0	1	0	0	0	0	0	1	0	0	0	0	1	0	1	1	1	451	0	36	113	6	0	12	6.1114673614502	144	665
1976	3360	1	1	18	34	12	17	370720	1	0	0	0	0	0	0	1	0	0	0	0	1	0	0	1	1	684	0	44	101	1	1	10	6.52795791625977	100	665
1977	3361	1	1	13	28	NA	12	383527	0	1	0	0	0	0	0	1	0	0	0	0	1	0	1	1	1	435	1	39	NA	4	0	9	6.07534599304199	81	665
1978	3362	1	1	13	32	12	12	370720	1	0	0	0	0	0	0	1	0	0	0	0	1	0	1	1	1	913	0	36	113	1	1	13	6.81673574447632	169	665
1979	3363	1	1	13	33	NA	12	1112160	1	0	0	0	0	0	0	1	0	0	0	0	1	0	0	1	1	855	0	31	88	1	1	14	6.75110149383545	196	665
1980	3364	1	1	10	34	NA	10	1112160	0	1	0	0	0	0	0	1	0	0	0	0	1	0	1	1	1	600	0	25	NA	1	0	18	6.39692974090576	324	665
1981	3365	1	1	12	28	NA	NA	88672	1	0	0	0	0	0	0	1	0	0	0	0	1	1	1	1	1	256	0	22	NA	6	0	10	5.5451774597168	100	665
1982	3366	1	1	12	29	NA	12	134296	0	1	0	0	0	0	0	1	0	0	0	0	1	1	1	1	1	375	0	41	93	6	1	11	5.92692613601685	121	665
1983	3367	1	1	16	27	NA	5	104794	0	1	0	0	0	0	0	1	0	0	0	0	1	1	1	1	1	441	0	29	117	1	1	5	6.08904504776001	25	665
1984	3368	1	1	13	25	NA	5	102225	0	1	0	0	0	0	0	1	0	0	0	0	1	1	1	1	1	405	0	29	NA	1	1	6	6.00388717651367	36	665
1985	3369	1	1	12	32	NA	7	127041	0	1	0	0	0	0	0	1	0	0	0	0	1	1	1	1	1	410	0	39	83	5	1	14	6.01615715026855	196	665
1986	3370	1	1	15	27	15	12	378045	1	0	0	0	0	0	0	1	0	0	0	0	1	0	1	1	1	300	1	35	103	6	1	6	5.70378255844116	36	665
1987	3371	1	1	16	26	14	16	378045	1	0	0	0	0	0	0	1	0	0	0	0	1	0	1	1	1	693	0	27	113	1	1	4	6.54102993011475	16	665
1988	3373	1	1	18	30	NA	10	501027	1	0	0	0	0	0	0	1	0	0	0	0	1	0	1	0	1	1012	0	38	124	1	1	6	6.91968393325806	36	665
1989	3375	1	0	15	26	15	12	78509	1	0	0	0	0	0	0	1	0	0	0	0	1	1	1	1	1	452	0	33	123	1	1	5	6.11368227005005	25	665
1990	3379	1	0	12	28	11	12	107087	1	0	0	0	0	0	0	1	0	0	0	0	1	0	1	1	1	388	0	42	NA	1	1	10	5.96100521087646	100	665
1991	3381	1	0	18	27	13	16	375674	1	0	0	0	0	0	0	1	0	0	0	0	1	0	0	1	1	492	0	32	98	1	1	3	6.19847869873047	9	665
1992	3384	1	0	5	31	NA	NA	451538	0	0	0	0	0	0	0	1	0	0	0	0	1	0	0	1	1	313	0	12	NA	1	0	20	5.74620342254639	400	665
1993	3388	0	1	14	26	12	12	107087	1	0	0	0	0	0	0	1	0	0	0	0	1	0	1	1	1	577	0	32	107	5	1	6	6.35784244537354	36	665
1994	3389	0	1	12	24	12	12	104102	1	0	0	0	0	0	0	1	0	0	0	0	1	0	1	1	1	375	0	31	NA	5	1	6	5.92692613601685	36	665
1995	3395	0	1	12	33	NA	10	103511	0	1	0	0	0	0	0	1	0	0	0	0	1	0	1	0	1	655	0	36	114	1	1	15	6.48463535308838	225	665
1996	3396	0	1	16	26	10	11	107087	1	0	0	0	0	0	0	1	0	0	0	0	1	0	1	1	1	709	0	32	119	6	1	4	6.56385564804077	16	665
1997	3398	0	1	14	26	3	9	77507	0	0	0	0	0	0	0	1	0	0	0	0	1	1	1	1	1	511	0	26	82	6	0	6	6.23636960983276	36	665
1998	3400	0	1	12	34	4	1	103511	1	0	0	0	0	0	0	1	0	0	0	0	1	0	1	1	1	625	0	40	89	1	0	16	6.43775177001953	256	665
1999	3402	0	1	14	25	11	10	425871	1	0	0	0	0	0	0	1	0	0	0	0	1	0	1	1	1	460	0	32	111	6	0	5	6.13122653961182	25	665
[truncated: 1,011 more rows]
